# Supplementary material for: Accuracy of testing for anti-Helicobacter pylori IgG in urine for H. pylori infection diagnosis: a systematic review and meta-analysis
Source: PubMed Central journal article supplement — BMJ Open. 2017 Apr 28;7(4):e013248. doi: 10.1136/bmjopen-2016-013248 (PMC5719657; doi:10.1136/bmjopen-2016-013248), 2017-04-28
Supplement: bmjopen-2016-013248.draft_revisions.pdf [file bmjopen-2016-013248.draft_revisions.pdf]

# BMJ Open

## Accuracy of testing for anti-Helicobacter pylori IgG in urine for H. pylori infection diagnosis: systematic review and meta-analysis

|                                 |                                                                                                                                                                                                                                                                                                                                                                                                                                        |
|---------------------------------|----------------------------------------------------------------------------------------------------------------------------------------------------------------------------------------------------------------------------------------------------------------------------------------------------------------------------------------------------------------------------------------------------------------------------------------|
| Journal:                        | <i>BMJ Open</i>                                                                                                                                                                                                                                                                                                                                                                                                                        |
| Manuscript ID                   | bmjopen-2016-013248                                                                                                                                                                                                                                                                                                                                                                                                                    |
| Article Type:                   | Research                                                                                                                                                                                                                                                                                                                                                                                                                               |
| Date Submitted by the Author:   | 01-Jul-2016                                                                                                                                                                                                                                                                                                                                                                                                                            |
| Complete List of Authors:       | Gong, Yuehua; Cancer Institute and General Surgery, The First Affiliated Hospital of China Medical University , Department of Tumor Etiology and Screening<br>Li, Qiuping; Cancer Institute and General Surgery, The First Affiliated Hospital of China Medical University , Department of Tumor Etiology and Screening<br>Yuan, Yuan; Cancer Institute and General Surgery, The First Affiliated Hospital of China Medical University |
| <b>Primary Subject Heading</b>: | Gastroenterology and hepatology                                                                                                                                                                                                                                                                                                                                                                                                        |
| Secondary Subject Heading:      | Infectious diseases                                                                                                                                                                                                                                                                                                                                                                                                                    |
| Keywords:                       | H.pylori, urine IgG antibody, diagnosis, Meta analysis                                                                                                                                                                                                                                                                                                                                                                                 |
|                                 |                                                                                                                                                                                                                                                                                                                                                                                                                                        |

SCHOLARONE™  
Manuscripts

1  
2  
3 **Accuracy of testing for anti-*Helicobacter pylori* IgG in urine for *H. pylori* infection**  
4  
5 **diagnosis: systematic review and meta-analysis**  
6

7 Yuehua Gong, Li Qiuping, Yuan Yuan\*

8  
9 *Department of Tumor Etiology and Screening, Cancer Institute and General Surgery, The First Affiliated Hospital of China*  
10 *Medical University and Key Laboratory of Cancer Etiology and Prevention, Liaoning Provincial Education*  
11 *Department, Shenyang 110001, China*  
12

13  
14 \*Correspondence should be addressed to Yuan Yuan; yyuansubmission@hotmail.com  
15

16  
17 **Abstract**

18 **Objectives:** This meta-analysis aims to systematically measure the potential diagnostic value  
19 of Anti-*H. pylori* IgG in urine for infection diagnosis, using all eligible studies published in the  
20 English and Chinese language literature.  
21

22  
23 **Design:** The random effect model was used to analyse the pooled sensitivity, specificity,  
24 positive likelihood ratio (PLR), negative LR (NLR), diagnostic odds ratio (DOR), together with  
25 the summary receiver operator characteristic (SROC) curve.  
26

27  
28 **Setting :** Literature searches of databases including PubMed, EMBASE, MEDLINE, Web of  
29 Science, Chinese National Knowledge Infrastructure (CNKI) and Wanfang Databases were  
30 performed to retrieve studies evaluating the diagnostic value of urine IgG antibody for  
31 *H.pylori* infection  
32

33  
34 **Primary outcome measure:** Twenty-three studies were included in the current  
35 meta-analysis with 4,963 subjects.  
36

37  
38 **Results:** The pooled sensitivity, specificity, PLR, NLR, DOR, and AUC were 0.83 (95% CI,  
39 0.82-0.85), 0.89 (95% CI, 0.88-0.90), 8.81 (95% CI, 6.37-12.2), 0.13 (95% CI, 0.09-0.2), 73 (95%  
40 CI, 46.45-114.74), and 0.9551, respectively. Subgroup analyses showed that in Asian, healthy  
41 or adult population, anti-*H.pylori* antibody in urine yielded more accurate results and  
42 seemed to be more valuable in diagnosing of *H.pylori* infection.  
43

44  
45 **Conclusions:** Anti-*H.pylori* antibody in urine exerts important function and represent a good  
46 marker in diagnosing *H.pylori* infection. However, further validation based on a larger  
47 sample is still required.  
48

49  
50 **Strengths and limitations of this study:**  
51  
52  
53  
54  
55  
56  
57  
58  
59  
60

1  
2  
3  
4  
5  
6  
7  
8  
9  
10  
11  
12  
13  
14  
15  
16  
17  
18  
19  
20  
21  
22  
23  
24  
25  
26  
27  
28  
29  
30  
31  
32  
33  
34  
35  
36  
37  
38  
39  
40  
41  
42  
43  
44  
45  
46  
47  
48  
49  
50  
51  
52  
53  
54  
55  
56  
57  
58  
59  
60

Non-invasive tests for the assessment of *H.pylori* status have become part of the management strategies for individuals. Preliminary studies have explored the diagnostic accuracy for anti-*H.pylori* antibody in urine, but the results are inconclusive. In the present study, we performed a comprehensive databases search for all the eligible studies reported the diagnostic accuracy of anti-*H.pylori* antibody in urine. Our meta-analysis is strengthened by the use of a standard protocol, strict inclusion criteria, standardized data extraction, independent reviewers. To the best of our knowledge, this is the first study assessing the summary predictive value of Anti-*H. pylori* IgG in urine for infection diagnosis.

Several limitations should be acknowledged in this meta-analysis when interpreting the results. First, included documents were not comprehensive enough. The search range was limited to the published studies, however the unpublished research such as conference papers, can not be obtained. This may probably miss some gray literatures. On the other hand, only the studies published in English or Chinese were included in this meta-analysis, which might miss relevant research of other languages. Second, for articles contained different cut-off values within the same study, we selected the cut-off value according to the manufacturer recommended. This may lead to the included cutoff value may be not the most appropriate one in the specific area. Third, as a diagnostic test, urine IgG antibody determined with the blinded can minimize the tendency to diagnose. However, most studies did not report whether blinding detect was used, which may increases the possibility of measurement bias.

## Introduction

1  
2  
3 Helicobacter pylori (*H. pylori*) is a bacterium that chronically infects more than half the  
4 world's population and plays a causative role in the pathogenesis of chronic gastritis, peptic  
5 ulcer diseases, gastric cancer, and mucosa-associated lymphoid tissue lymphoma [1]. The  
6 considerable burden of these *H. pylori*-related sequelae means that there is an acute demand  
7 for accurate diagnosis of this infection. Several detection methods have been developed, such  
8 as culture, histological staining, urea breath test (UBT), and *H. pylori* stool antigen test  
9 (HpSA), among which, a simple, non-invasive, and inexpensive but accurate diagnostic test  
10 remains the goal.

11  
12  
13  
14  
15  
16 A number of methods have been developed for non-invasive *H. pylori* infection  
17 diagnosis using body fluids. Tests for the detection of anti-*H. pylori* antibodies in serum are  
18 widely used because they are relatively straightforward, convenient, and economical. A  
19 number of studies have reported the presence of specific antibodies for *H. pylori* in body  
20 fluids other than serum [2]. Anti-*H. pylori* IgG in urine is detectable and has been used for the  
21 diagnosis of *H. pylori* infection. If sensitive screening for *H. pylori* infection was possible  
22 using urine samples, it would not only be more convenient in clinical practice but would also  
23 be very useful for mass screening.

24  
25  
26  
27  
28  
29  
30 In 1993, Alemohammad *et al.* reported that ELISA was both highly sensitive and  
31 specific for the detection of anti-*H. pylori* antibodies in urine. These findings were confirmed  
32 by another study from Japan [3,4]. The Japanese study laid the groundwork for the  
33 development of a urine-based ELISA kit and a rapid immunochromatography assay for *H.*  
34 *pylori* diagnosis. Evaluation of the immunochromatography assay in Japanese asymptomatic  
35 adults and patients with gastric disorders showed promising results against UBT (sensitivity:  
36 86.3%–99%; specificity: 91.5%–100%) [4,5]. Studies using ELISA among Japanese children  
37 revealed high levels of sensitivity and specificity as well. When compared with <sup>13</sup>C-UBT  
38 and/or HpSA, sensitivity ranged between 92.3% and 94.4%, and specificity ranged between  
39 76.4% and 96.9% [6,7]. Different findings were recorded, however, for the same kit when  
40 compared with gastrointestinal endoscopic testing for *H. pylori*, in line with European  
41 multicentre studies. Sensitivity and specificity in adults were 89.4% and 68%, respectively  
42 [8]. The corresponding figures in children were 63.2% and 97.3% [9]. Subsequently, the  
43 accuracy and usefulness of the immunochromatography assay have been supported by several  
44 trials in different geographic areas, including Japan<sup>[10]</sup>, Turkey [11], Hong Kong and Taiwan  
45 [12], the United States [13], and Europe [14].

46  
47  
48  
49  
50  
51  
52  
53  
54  
55  
56  
57  
58  
59  
60  
61 Variations in the sensitivity and specificity of anti-*H. pylori* IgG in urine revealed by  
62 the previous trials indicate the need for comprehensive evaluation of the test performance

1  
2  
3 before wider application. Therefore, this systematic review and meta-analysis was conducted  
4 to identify whether anti-*H. pylori* IgG in urine can serve as a valuable test for *H. pylori*  
5 diagnosis.  
6  
7

## 8 **Methods**

### 9 *Literature search strategy*

10 We searched several electronic databases up to January 7, 2016, namely, PubMed,  
11 EMBASE, MEDLINE, Web of Science, Chinese National Knowledge Infrastructure (CNKI)  
12 and Wanfang Databases by two independent researchers to identify relevant studies that  
13 evaluated the diagnostic value of urine IgG antibody for *H. pylori* infection. The following  
14 search terms (in Title, Abstract or keywords fields) were combined using Boolean rules:  
15 ‘*H. pylori*’, ‘*Helicobacter pylori*’, ‘urine IgG antibody’, ‘urine antibody’, with a filter for  
16 human studies published in English or Chinese. Two researchers (Yuehua Gong and Qiuping  
17 Li) screened all the titles and abstracts; studies including data on *H. pylori* and urine IgG  
18 levels were read in full. The reference lists of the selected papers were hand-searched to  
19 identify additional papers. When multiple publications presented results using the same  
20 patient cohort, the most recent or the most complete publication was selected for inclusion.  
21 Review articles and references from accepted articles were searched for any additional  
22 papers.  
23  
24  
25  
26  
27  
28  
29  
30  
31  
32

### 33 *Literature selection criteria*

34 We included studies that met the following criteria: (1) Anti-*H. pylori* IgG antibody in  
35 urine was determined; (2) Investigation of the diagnostic accuracy of urine IgG of *H. pylori*  
36 compared to culture or histopathology or UBT or HpSA (based on only one or at least two  
37 reference methods); (3) Sensitivity, specificity, and cut-off values can be found in identified  
38 studies or calculated from the provided data; (4) Publication of full paper in a peer-reviewed  
39 scientific journal. While the exclusion criteria were listed as follows: (1) studies with  
40 insufficient data to construct the 2\*2 table; (2) The reference standard was only serological  
41 assay; (3) Reviews, letters, and conference abstracts; and (4) publications were identified as  
42 duplicates. Two researchers (Yuehua Gong and Qiuping Li) independently assessed the  
43 papers for final selection. If a study fulfilled the eligibility criteria, it was included in the  
44 systematic review. Any discrepancies were resolved with discussion.  
45  
46  
47  
48  
49  
50  
51  
52  
53  
54

55 Data extraction and QUADAS-2 assessment the following variables were extracted from  
56 the original studies in a predefined data extraction form (see Table 1): Author, Ethnicity, year  
57  
58  
59  
60

1  
2  
3 of publication, number of cases, age (adults or children), study population (patients or  
4 healthy), reference standard, and assay method (ELISA or IM technique). True positives (TP),  
5 false positives (FP), false negatives (FN), and true negatives (TN) with urine IgG antibody  
6 diagnose were included. Extraction of studies was done independently by two reviewers.  
7  
8 Discrepancies in the interpretation were resolved by consensus. If a study was selected for the  
9 systematic review but did not provide data that could be included in the meta-analysis, the  
10 authors were contacted via e-mail. If the authors did not reply or did not provide the  
11 requested information, then this article would be excluded.  
12  
13  
14  
15

### 16 ***Statistical analysis***

17  
18 The following parameters representing test accuracy were calculated based on the data  
19 (TP, FP, FN, and TN) we extracted from each included studies: the pooled sensitivity,  
20 specificity, PLR, NLR, DOR, and corresponding 95% confidence intervals (95% CI).  
21 Simultaneously, the SROC was also calculated. The heterogeneity was measured by Q test  
22 and the inconsistency index ( $I^2$ ), and a  $P < 0.05$  and a  $I^2 > 50\%$  indicated significant  
23 heterogeneity among studies, the random-effect model (DerSimonian-Laird method) was  
24 conducted for the meta-analysis to calculate the pooled sensitivity, specificity, and other  
25 related indexes of the studies, and meta-regression was performed to detect the source;  
26 otherwise, the fixed-effect model (MantelHaenszel method) was chosen.  
27  
28  
29  
30  
31  
32

33 In addition, the Spearman correlation coefficient was used to verify if the heterogeneity  
34 in meta-analysis could be explained by a threshold effect; a threshold effect was defined as a  
35 positive correlation ( $P < 0.05$ ). Subgroup analyses were performed for region, age, study  
36 population, and assay method. Deek's Funnel Plot Asymmetry Test was applied to determine  
37 the presence of publication bias using STATA 12.1 software (Stata Corp., College Station,  
38 Texas, USA.) [15] and a  $P < 0.05$  indicated the presence of publication bias. MetaDisc  
39 (version 1.4) software [16] was also used to calculate the other parameters of diagnostic  
40 accuracy. All P values were two-sided, and  $P < 0.05$  was considered statistically significant.  
41  
42  
43  
44  
45  
46  
47

## 48 **Results**

### 49 ***Search results***

50  
51 Figure 1 summarizes the search process and numerical selection of the final papers that were  
52 included in the systematic review and meta-analysis. A systematic search of biomedical  
53 databases resulted in 423 hits, and after excluding duplicates, 246 citations were identified.  
54 No unpublished literature relevant to the topic was identified. Forty papers were selected  
55 based on their abstracts and titles and were read in full for eligibility. Two eligible studies  
56  
57  
58  
59  
60

1  
2  
3 referred to the same study group, hence, only one of them was included in the systematic  
4 review [6,14]. Twenty-four individual studies fulfilled eligibility criteria and were included in  
5 the systematic review [3-5,7,8,10-14][9,17,18,19]. Twenty-three studies had extractable data  
6 after contacting the authors and were included in the meta-analysis [3-5][7-9,11-14,17,18,20].  
7  
8 A flowchart detailing the process for how studies were selected is shown in Figure 1.  
9

### 10 11 ***Study characteristics***

12 Baseline characteristics of the eligible studies are summarized in Table 1. A total of 23 studies  
13 with 4963 participants were included in the meta-analysis. Among these studies, three were  
14 conducted in the United States [3,13,18], two in Europe[8,9], and the remaining 18 in Asia. All  
15 eligible studies were published between 2000 and 2014. Sample sizes ranged between 21 and  
16 449. Urinary *H. pylori* IgG was detected using ELISA in nine studies, using  
17 immunochromatography in nine studies, and using both assays in five studies. Key data were  
18 successfully extracted from all included studies, such as true positives, false positives, false  
19 negatives, and true negatives. The number of true positives ranged between 12 and 237, the  
20 number of false negatives ranged between 0 and 83, the number of false positives ranged  
21 between 0 and 66, and the number of true negatives ranged between 2 and 176.  
22  
23

### 24 25 26 27 28 29 30 ***Quality assessment***

31 Quality Assessment of Diagnostic Accuracy Studies-2 (QUADAS-2) summary plots are  
32 outlined in Table 2 and Supplemental Figure 1 and show the methodological quality of the  
33 selected studies assessed using the QUADAS-2 tool [21]. The majority of studies were  
34 ranked as high quality for most domains. A score of 1 for each “yes” and a score of 0 for each  
35 “unclear” and “no” was given. Any scoring discrepancies were resolved through discussion.  
36  
37

### 38 39 40 41 ***Diagnostic accuracy and threshold analysis***

42 Spearman’s correlation coefficient was first used to examine whether the threshold effect  
43 existed, because of it being the important source of heterogeneity. Spearman’s correlation  
44 coefficient for sensitivity and 1-specificity in the meta-analysis was 0.161, with a *P*-value of  
45 0.413, suggesting no heterogeneity from the threshold effect. Heterogeneity was measured  
46 using the Q test and the inconsistency index ( $I^2$ ) to choose the appropriate calculation model.  
47 There was statistically significant heterogeneity in the pooled diagnostic odds ratio (DOR)  
48 (DOR = 73,  $I^2$  = 75%, *P* = 0.0000) (Figure 2). Therefore, the random effects model was used  
49 for calculating sensitivity, specificity, positive likelihood ratio (PLR) and DOR.  
50

51 Based on extracted data on true positives, true negatives, false positives, and false  
52 negatives from the included studies that evaluated the diagnostic accuracy of urinary IgG in  
53  
54  
55  
56  
57  
58  
59  
60

1  
2  
3 *H. pylori* diagnosis, the following diagnostic quantitative results were obtained. Pooled  
4 sensitivity and specificity were 0.83 (95% CI: 0.82–0.85; Figure 3a) and 0.89 (95% CI:  
5 0.88–0.90; Figure 3b), respectively. Pooled PLR and negative likelihood ratio (NLR) were  
6 8.81 (95% CI: 6.37–12.2; Figure 3c) and 0.13 (95% CI: 0.09–0.2; Figure 3d), respectively.  
7  
8 The summary receiver operating characteristic (sROC) curve for urinary IgG was positioned  
9 near the desirable upper left corner, and the area under the curve (AUC) was 0.9551,  
10 indicating that the level of overall accuracy was high (Supplemental Figure 2).  
11  
12

### 13 **Subgroup analysis**

14  
15 Subgroup analysis was conducted based on age, region, study population, and assay method.  
16 Pooled results are shown in Table 3. A random effects model was used because significant  
17 heterogeneity was observed (all  $I^2 > 50\%$ ).  
18  
19

### 20 **Age analysis**

21  
22 Seven studies containing 1047 adults (>17 years of age) were evaluated for diagnostic  
23 accuracy of the urine IgG assay for *H. pylori* diagnosis. Pooled sensitivity, specificity, PLR,  
24 and NLR were 0.87 (95% CI: 0.84–0.89), 0.91 (95% CI: 0.88–0.94), 8.13 (95% CI:  
25 4.61–14.33), and 0.13 (95% CI: 0.07–0.22), respectively, with a DOR of 85.12 and AUC  
26 value of 0.9593. The diagnostic performance of urinary IgG was lower for young persons in  
27 the four other studies containing 644 children ( $\leq 17$  years of age). Pooled sensitivity,  
28 specificity, PLR, and NLR were 0.53 (95% CI: 0.48–0.58), 0.96 (95% CI: 0.94–0.97), 17.93  
29 (95% CI: 4.83–62.59), and 0.35 (95% CI: 0.22–0.58), respectively, with a DOR of 61.62 and  
30 AUC value of 0.9632. Therefore, the diagnostic accuracy of the urine IgG assay might be  
31 more promising in adults than in children.  
32  
33

### 34 **Region analysis**

35  
36 Of the 23 included studies, five were from Europe or the United States and the remaining 18  
37 were from Asia. For studies from Europe and the United States, analysis showed a pooled  
38 sensitivity of 0.80 (95% CI: 0.77–0.82) and a pooled specificity of 0.88 (95% CI: 0.86–0.90).  
39 Combined PLR was 12.05 (95% CI: 5.22–27.8) and NLR was 0.16 (95% CI: 0.07–0.38).  
40 AUC and DOR were 0.9557 and 73.75, respectively, suggesting moderate diagnostic  
41 accuracy. For studies from Asia, performance of the urine IgG assay for the diagnosis of *H.*  
42 *pylori* showed an improvement in accuracy, with a pooled sensitivity of 0.86 (95% CI:  
43 0.84–0.88) and a pooled specificity of 0.9 (95% CI: 0.88–0.92). Combined PLR was 7.74 (95%  
44 CI: 5.77–10.39), NLR was 0.12 (95% CI: 0.07–0.2), and DOR was 73.75. AUC was 0.9553,  
45 suggesting relatively high diagnostic accuracy. Therefore, the urine IgG assay might be more  
46 reliable for Asian populations than for populations from other countries.  
47  
48  
49  
50  
51  
52  
53  
54  
55  
56  
57  
58  
59  
60



### ***Study population analysis***

Study population analysis, which included patients and healthy controls, was performed in the systematic review. A total 16 patient studies and five healthy or without significant upper abdominal symptoms studies were evaluated for diagnostic accuracy of the urine IgG assay. In the patient population, pooled sensitivity, specificity, PLR, and NLR were 0.84 (95% CI: 0.82–0.85), 0.87 (95% CI: 0.85–0.89), 7.17 (95% CI: 5.18–9.93), and 0.14 (95% CI: 0.09–0.23), respectively, with a DOR of 54.29 and AUC value of 0.9436. In the healthy population, pooled sensitivity, specificity, PLR, and NLR were 0.75 (95% CI: 0.69–0.80), 0.97 (95% CI: 0.94–0.98), 16.25 (95% CI: 6.94–38.06), and 0.13 (95% CI: 0.03–0.53), respectively, with a DOR of 156.11 and AUC value of 0.98. Except for pooled sensitivity, the diagnostic performance of the urine IgG assay was better for the healthy population than the patient population, suggesting relatively high diagnostic accuracy in the healthy population.

### ***Assay method analysis***

In the review, urinary *H. pylori* IgG was detected using ELISA in nine studies, using immunochromatography in nine studies, and using both assays in five studies. For studies that used ELISA, pooled sensitivity was 0.86 (95% CI: 0.84–0.87) and pooled specificity was 0.87 (95% CI: 0.84–0.88). Combined PLR was 7.92 (95% CI: 5.02–12.5) and NLR was 0.12 (95% CI: 0.07–0.23). AUC and DOR were 0.9521 and 67.46, respectively. For studies that used immunochromatography, pooled sensitivity, specificity, PLR, and NLR were 0.81 (95% CI: 0.78–0.83), 0.92 (95% CI: 0.89–0.93), 9.81 (95% CI: 6.28–15.34), and 0.14 (95% CI: 0.07–0.28), respectively, with a DOR of 82.94 and AUC value of 0.9584. Analysis suggested that there was no significant difference between ELISA and immunochromatography in diagnostic performance for the antibody in urine.

### ***Meta-regression analysis***

Heterogeneity was found in summary estimates for sensitivity, specificity, PLR, NLR, and DOR. Therefore, meta-regression was conducted to examine the source of heterogeneity based on region, sample size, age, study population, blind design, quality of study, and assay method. The results indicated that study population and quality of study were the important factors contributing to heterogeneity ( $P = 0.0189$  and  $P = 0.0295$ , respectively) (Table 4).

### ***Publication bias***

Because publication bias is recognized as an important factor that influences the results of meta-analysis [22], the Deeks' funnel plot asymmetry test was performed to examine publication bias (Supplemental Figure 3). The test returned a  $P$ -value of 0.124, suggesting

1  
2  
3 that potential publication bias did not exist among the studies.  
4

#### 5 **Discussion**

6 Non-invasive tests for the assessment of *H. pylori* status have become part of management  
7 strategies for individuals[23]. Preliminary studies have explored the diagnostic accuracy of  
8 testing for anti-*H. pylori* antibodies in urine, but the results are inconclusive. In the present  
9 study, we performed comprehensive database searches for all eligible studies reporting the  
10 diagnostic accuracy of testing for anti-*H. pylori* antibodies in urine. Our meta-analysis was  
11 strengthened by the use of a standard protocol, strict inclusion criteria, standardized data  
12 extraction, and independent reviewers. To the best of our knowledge, this is the first study  
13 assessing the summary predictive value of anti-*H. pylori* IgG in urine for infection diagnosis.  
14  
15

16 After pooling data, the following summary of diagnostic parameters was obtained.  
17 Pooled sensitivity was 0.83 and pooled specificity was 0.89, which represent a good marker  
18 for *H. pylori* diagnosis. The sROC curve, which assesses overall test performance by showing  
19 the trade-off between sensitivity and specificity, had an AUC of 0.9551, suggesting good  
20 accuracy. Another indicator of diagnostic accuracy is DOR, which combines sensitivity and  
21 specificity data into a single number ranging from 0 to infinity, with a higher value indicating  
22 better discriminatory test performance. Mean DOR in the meta-analysis was 73, suggesting  
23 that testing for anti-*H. pylori* antibodies in urine should be helpful in the diagnosis of *H.*  
24 *pylori* infection. We further examined the diagnostic accuracy of anti-*H. pylori* antibody in  
25 urine by calculating PLR and NLR, which can be easier to relate to clinical practice than  
26 sROC and DOR. Pooled PLR was 8.81 and pooled NLR was 0.13, indicating that the  
27 presence of anti-*H. pylori* antibodies in urine has an important function in diagnosing *H.*  
28 *pylori* infection. Substantial heterogeneity was found with meta-analysis, where pooled  
29 specificity, PLR, NLR, and DOR were analysed. Therefore, the random-effect model was  
30 used to synthesise the above data.  
31  
32  
33  
34  
35  
36  
37  
38  
39  
40  
41  
42  
43  
44

45 Heterogeneity is an important factor that can affect the results of meta-analysis.  
46 Therefore, we used Spearman's correlation coefficient to clarify whether the threshold effect  
47 contributed to the source of heterogeneity. Spearman's correlation coefficient was 0.193, with  
48 a *P*-value of 0.334, suggesting that heterogeneity among the included studies could not have  
49 been induced by the threshold effect. We further used subgroup analysis based on study  
50 population, region, age, and assay method to explore heterogeneity.  
51  
52  
53  
54

55 First, in age subgroup analysis, pooled sensitivity was found to be significantly higher  
56 in adults than in children. A previous report suggests a significant positive association  
57 between the sensitivity of anti-*H. pylori* antibodies in urine and children's age [24]. A strong  
58  
59  
60

1  
2  
3 association between the sensitivity of testing using ELISA serum IgG for *H. pylori* and the  
4 increasing age of the children studied has been reported [25]. It is possible that the diagnostic  
5 accuracy of the urine IgG assay might be because of a higher antibody response in adults than  
6 in children.  
7  
8

9  
10 Second, we found that the urine antibody showed a relatively higher diagnostic  
11 accuracy in Asian countries compared with Europe and the United States. This finding may  
12 be because the *H. pylori* antigen spectrum is different in Asian strains compared with most  
13 European strains. The antigen used in detection kits, which is extracted from *H. pylori* strains  
14 isolated in Japan[10,11], might not always react well with anti-*H. pylori* IgG produced by  
15 European or American individuals, resulting in a number of false negative cases.  
16  
17

18  
19 Third, for the study population, subgroup analysis showed that diagnostic  
20 performance of the urine IgG assay was better in healthy people than in patients. In  
21 meta-analysis, the patient population included dyspeptic, chronic gastritis, and peptic ulcer  
22 patients amongst others. It is possible that the disease condition in the stomach may cause a  
23 change in *H. pylori* colonization. *H. pylori* IgG is not synchronized with the *H. pylori*  
24 infection process, and delayed generation or the disappearance of colonization for several  
25 months may affect results. Graham *et al.*[18] reported that urine test results may remain  
26 positive for an extended time after successful treatment of the infection. This may be an  
27 important factor affecting the accuracy of the antibody test in the diseased population.  
28  
29

30  
31 Fourth, in assay method subgroup analysis, we did not find any significant difference  
32 between ELISA and immunochromatography for the diagnostic performance of urine IgG  
33 testing. We conducted meta-regression analysis to investigate sources of heterogeneity.  
34 Regression analysis demonstrated that study population was the important factor contributing  
35 to heterogeneity, a finding consistent with subgroup analysis. Additionally, regression  
36 analysis showed that the quality of included studies was another factor for heterogeneity. In  
37 meta-analysis, 23 included studies were qualified using QUADAS-2 assessment, which  
38 included a score of 7 for one study, a score of 8 for nine studies, a score of 9 for four studies,  
39 and a score of 10 or more for nine studies. According to regression analysis, there was a  
40 difference in diagnostic accuracy between low and high scoring studies.  
41  
42

43  
44 There are several limitations to the meta-analysis that should be borne in mind when  
45 interpreting the results. First, the studies included is not an exhaustive list, with the search  
46 range being limited to published studies. Unpublished research, such as conference papers,  
47 cannot be obtained. It is therefore possible that some literature has been missed. Additionally,  
48 only studies published in English or Chinese were included, which means that relevant  
49  
50  
51  
52  
53  
54  
55  
56  
57  
58  
59  
60

1  
2  
3 research published in other languages has not been included. Second, , for articles that  
4 contained different cut-off values within the same study, we selected cut-off values according  
5 to the manufacturers' recommendations. This may mean that the included cut-off values may  
6 not be the most appropriate ones for specific areas. Third, as a diagnostic test, urinary IgG  
7 determined using blinded testing can reduce the tendency to diagnose. However, most studies  
8 did not report whether blinded detection was used, which may increase the possibility of  
9 measurement bias.  
10

11  
12  
13  
14 In conclusion, testing for anti-*H. pylori* antibodies in urine has an important function  
15 and represents a good marker for the diagnosis of *H. pylori* infection. Sources of  
16 heterogeneity were found to come from region, age, quality of the studies included, and  
17 especially from study population. The urine IgG assay showed better diagnostic performance  
18 in Asian populations compared with European or American, in healthy people compared with  
19 patients, and in adults compared with children. Further large-scale, well-designed studies  
20 examining different study populations are required to confirm the results of this  
21 meta-analysis.  
22  
23  
24  
25  
26  
27  
28  
29  
30  
31  
32  
33  
34  
35  
36  
37  
38  
39  
40  
41  
42  
43  
44  
45  
46  
47  
48  
49  
50  
51  
52  
53  
54  
55  
56  
57  
58  
59  
60

## References

- 1 Covacci A, Telford JL, Del Giudice G, Parsonnet J, Rappuoli R. Helicobacter pylori virulence and genetic geography *Science*. 1999;284:1328-1333; Peek RM, Jr., Blaser MJ. Helicobacter pylori and gastrointestinal tract adenocarcinomas *Nature reviews. Cancer*. 2002;2:28-37; Suerbaum S, Michetti P. Helicobacter pylori infection *The New England journal of medicine*. 2002;347:1175-1186; Plebani A, Notarangelo LD, Monafo V, Nespoli L, Ugazio AG. A new immunoperoxidase assay for Lolium perenne-specific IgE in serum based on the biotin/avidin system (BAS) *Clinical allergy*. 1984;14:373-378.
- 2 Yamamoto T, Tamura M, Ishii Tet al. . Urinary antibody titers to Helicobacter pylori and an impact of clinical characteristics *Journal of clinical gastroenterology*. 2003;36:329-331; Yamamoto T, Kojima K, Sanaka Met al. . Reliability of rapid urinary test for antibody to Helicobacter pylori in adult patients with proteinuria *Diagnostic microbiology and infectious disease*. 2006;54:105-108.
- 3 Alemohammad MM, Foley TJ, Cohen H. Detection of immunoglobulin G antibodies to Helicobacter pylori in urine by an enzyme immunoassay method *Journal of clinical microbiology*. 1993;31:2174-2177.
- 4 Katsuragi K, Noda A, Tachikawa Tet al. . Highly sensitive urine-based enzyme-linked immunosorbent assay for detection of antibody to Helicobacter pylori *Helicobacter*. 1998;3:289-295.
- 5 Miwa H, Hirose M, Kikuchi Set al. . How useful is the detection kit for antibody to Helicobacter pylori in urine (URINELISA) in clinical practice? *The American journal of gastroenterology*. 1999;94:3460-3463.
- 6 Okuda M, Nakazawa T, Booka M, Miyashiro E, Yosikawa N. Evaluation of a urine antibody test for Helicobacter pylori in Japanese children *The Journal of pediatrics*. 2004;144:196-199.
- 7 Shimizu T, Yarita Y, Haruna Het al. . Urine-based enzyme-linked immunosorbent assay for the detection of Helicobacter pylori antibodies in children *Journal of paediatrics and child health*. 2003;39:606-610.
- 8 Leodolter A, Vaira D, Bazzoli Fet al. . European multicentre validation trial of two new non-invasive tests for the detection of Helicobacter pylori antibodies: urine-based ELISA and rapid urine test *Alimentary pharmacology & therapeutics*. 2003;18:927-931.
- 9 Megraud F. Comparison of non-invasive tests to detect Helicobacter pylori infection in children and adolescents: results of a multicenter European study *The Journal of pediatrics*. 2005;146:198-203.
- 10 Quach DT, Hiyama T, Shimamoto Fet al. . Value of a new stick-type rapid urine test for the diagnosis of Helicobacter pylori infection in the Vietnamese population *World journal of gastroenterology*. 2014;20:5087-5091.
- 11 Demiray Gurbuz E, Gonen C, Bekmen Net al. . The diagnostic accuracy of urine IgG antibody tests for the detection of Helicobacter pylori infection in Turkish dyspeptic patients *The Turkish journal of gastroenterology : the official journal of Turkish Society of Gastroenterology*. 2012;23:753-758.
- 12 Lu CY, Kuo FC, Wang SWet al. . The clinical applications and accuracy of 2 rapid near-patient tests in detecting Helicobacter pylori infection *Diagnostic microbiology and infectious disease*. 2006;56:241-246.
- 13 Opekun AR, Luu P, Gotschall ABet al. . Point-of-care Helicobacter pylori urine antibody detection in a multi-ethnic adult population in the United States *Translational research : the journal of laboratory and clinical medicine*. 2006;148:13-18.
- 14 Okuda M, Kamiya S, Booka Met al. . Diagnostic accuracy of urine-based kits for detection of Helicobacter pylori antibody in children *Pediatrics international : official journal of the Japan Pediatric Society*. 2013;55:337-341.
- 15 Deeks JJ, Macaskill P, Irwig L. The performance of tests of publication bias and other sample size effects in systematic reviews of diagnostic test accuracy was assessed *Journal of clinical epidemiology*. 2005;58:882-893.
- 16 Zamora J, Abaira V, Muriel A, Khan K, Coomarasamy A. Meta-DiSc: a software for meta-analysis of test accuracy data *BMC medical research methodology*. 2006;6:31.
- 17 Yamamoto S, Uemura N, Okamoto S, Yamaguchi S, Mashiba H, Tachikawa T. A new rapid test for detecting anti-Helicobacter pylori antibody excreted into urine *Helicobacter*. 2000;5:160-164; Fujisawa T, Kaneko T, Kumagai Tet al. . Evaluation of urinary rapid test for Helicobacter pylori in general practice *Journal of clinical laboratory analysis*. 2001;15:154-159; Miwa H, Akamatsu S, Tachikawa Tet al. . On-site diagnosis of H-pylori infection by urine *Diagnostic microbiology and infectious disease*. 2001;39:95-97; randomWong WM, Wong BC, Xia HHet al. . An evaluation of a rapid urine test for the diagnosis of Helicobacter pylori infection in the Chinese population *Alimentary pharmacology & therapeutics*. 2002;16:813-817; Muhsen K, Athamna A, Athamna M, Spungin-Bialik A, Cohen D. Evaluation of a urine-based enzyme-linked immunosorbent assay test for

- 1  
2  
3 the detection of *Helicobacter pylori* infection among 3- to 5-year-old Israeli Arab healthy children  
4 *Journal of pediatric gastroenterology and nutrition*. 2006;43:398-401; Nguyen LT, Uchida T,  
5 Tsukamoto Y et al. . Evaluation of rapid urine test for the detection of *Helicobacter pylori* infection in  
6 the Vietnamese population *Digestive diseases and sciences*. 2010;55:89-93.
- 7  
8  
9  
10  
11  
12  
13  
14  
15  
16  
17  
18  
19  
20  
21  
22  
23  
24  
25  
26  
27  
28  
29  
30  
31  
32  
33  
34  
35  
36  
37  
38  
39  
40  
41  
42  
43  
44  
45  
46  
47  
48  
49  
50  
51  
52  
53  
54  
55  
56  
57  
58  
59  
60
- 18 Graham DY, Reddy S. Rapid detection of anti-*Helicobacter pylori* IgG in urine using  
immunochromatography *Alimentary pharmacology & therapeutics*. 2001;15:699-702.
- 19 Wu DC, Kuo CH, Lu CY et al. . Evaluation of an office-based urine test for detecting *Helicobacter*  
*pylori*: a Prospective Pilot Study *Hepato-gastroenterology*. 2001;48:614-617; Adachi K, Kawamura  
A, Ono M et al. . Comparative evaluation of urine-based and other minimally invasive methods for the  
diagnosis of *Helicobacter pylori* infection *Journal of gastroenterology*. 2002;37:703-708; Kuo FC,  
Wang SW, Wu IC et al. . Evaluation of urine ELISA test for detecting *Helicobacter pylori* infection in  
Taiwan: a prospective study *World journal of gastroenterology*. 2005;11:5545-5548.
- 20 Quach DT, Hiyama T, Shimamoto F et al. . Value of a new stick-type rapid urine test for the diagnosis  
of *Helicobacter pylori* infection in the Vietnamese population *World journal of gastroenterology*.  
2014;20:5087-5091; Kuo F-C, Wang S-W, Wu IC et al. . Evaluation of urine ELISA test for detecting  
*Helicobacter pylori* infection in Taiwan: A prospective study *World journal of gastroenterology*.  
2005;11:5545-5548.
- 21 Whiting PF, Rutjes AW, Westwood ME et al. . QUADAS-2: a revised tool for the quality assessment of  
diagnostic accuracy studies *Annals of internal medicine*. 2011;155:529-536.
- 22 Sterne JA, Gavaghan D, Egger M. Publication and related bias in meta-analysis: power of statistical  
tests and prevalence in the literature *Journal of clinical epidemiology*. 2000;53:1119-1129.
- 23 Malfertheiner P, Megraud F, O'Morain CA et al. . Management of *Helicobacter pylori* infection--the  
Maastricht IV/ Florence Consensus Report *Gut*. 2012;61:646-664.
- 24 Megraud F, European Paediatric Task Force on *Helicobacter p*. Comparison of non-invasive tests to  
detect *Helicobacter pylori* infection in children and adolescents: results of a multicenter European  
study *The Journal of pediatrics*. 2005;146:198-203.
- 25 de Oliveira AM, Rocha GA, Queiroz DM et al. . Evaluation of enzyme-linked immunosorbent assay for  
the diagnosis of *Helicobacter pylori* infection in children from different age groups with and without  
duodenal ulcer *Journal of pediatric gastroenterology and nutrition*. 1999;28:157-161.

**Acknowledgements**

This work was supported by a grant from National Natural Science Foundation of China (Grant No. 31000074).

**Author contributions**

GYH and YY wrote the main manuscript text and LQP analyzed the data. All authors reviewed the manuscript.

**Competing financial interests**

The authors declare that they have no competing financial interests.

**Data sharing statement**

No additional unpublished data are available.

1  
2  
3 **Figure legends**  
4  
5  
6

7 **Fig 1. Flow diagram of the literature search.**  
8  
9

10 **Fig 2. Forest plots of DOR for or H.pylori diagnosis by urine IgG antibody.**

11 The pooled diagnostic odds ratio was 73(95%CI: 46.45-114.74)  
12  
13

14 **Fig 3. Forest plots of sensitivity, specificity, DLR+, and DLR- for H.pylori diagnosis by urine IgG antibody**  
15  
16

17 (a) The summary sensitivity was 0.83 (95% CI: 0.82–0.85; I2 = 94.4%); (b) The summary specificity  
18 0.89 (95% CI: 0.87–0.90; I2 = 86.1%); (c) The summary PLR was 8.5 (95% CI: 6.27-12.2; I2 = 81.0%); (d)  
19 The summary NLR of all articles was 0.13 (95% CI: 0.09–0.20; I2 = 96.3%).  
20  
21  
22  
23  
24  
25  
26  
27  
28  
29  
30  
31  
32  
33  
34  
35  
36  
37  
38  
39  
40  
41  
42  
43  
44  
45  
46  
47  
48  
49  
50  
51  
52  
53  
54  
55  
56  
57  
58  
59  
60



Table 1. Characteristics of the studies included in the meta-analysis

| Author                 | Ethnicity    | Year | Region  | No. of cases | Age      | Diseases | Reference standard | Blind design | Assay method | TP(a) | FP(b) | FN(c) | TN(d) |
|------------------------|--------------|------|---------|--------------|----------|----------|--------------------|--------------|--------------|-------|-------|-------|-------|
| Mohammad M             | American     | 1993 | America | 306          | MIX      | Patient  | C,HE,R             | N.A.         | ELISA        | 237   | 6     | 10    | 53    |
| Kiyonori Katsuragi     | Japanese     | 1998 | Asia    | 119          | N.A.     | MIX      | U                  | N.A.         | ELISA        | 69    | 0     | 1     | 49    |
| Hiroto Miwa            | Japanese     | 1999 | Asia    | 132          | Adult    | Patient  | U                  | Yes          | ELISA        | 63    | 5     | 10    | 54    |
| Mototsugu Kato         | Japanese     | 2000 | Asia    | 189          | N.A.     | Patient  | C,H,R              | N.A.         | ELISA        | 127   | 12    | 5     | 45    |
| Soichiro Yamamoto      | Japanese     | 2000 | Asia    | 117          | N.A.     | mix      | H,S                | N.A.         | IM           | 81    | 2     | 7     | 27    |
| D. Y. Graham           | American     | 2001 | America | 104          | Adult    | healthy  | U                  | Yes          | IM           | 41    | 2     | 2     | 59    |
| Toru Fujisawa          | Japanese     | 2001 | Asia    | 21           | Adult    | healthy  | C,H,R              | N.A.         | IM           | 18    | 1     | 0     | 2     |
| Hiroto Miwa            | Japanese     | 2001 | Asia    | 155          | Adult    | Patient  | U                  | N.A.         | IM           | 93    | 7     | 4     | 51    |
| Kyoichi Adachi         | Japanese     | 2002 | Asia    | 100          | MIX      | healthy  | U                  | Yes          | ELISA        | 32    | 2     | 3     | 37    |
|                        |              |      |         |              |          |          |                    |              | IM           | 30    | 1     | 5     | 38    |
| W. M. Wong             | Chinese      | 2002 | Asia    | 123          | Adult    | Patient  | R,H                | Yes          | IM           | 58    | 3     | 2     | 60    |
| Youke Lu               | Chinese      | 2002 | Asia    | 102          | MIX      | Patient  | C,R,H              | N.A.         | ELISA        | 60    | 4     | 2     | 27    |
| A. Leodolter, D. Vaira | European     | 2003 | Europe  | 449          | N.A.     | Patient  | C,H,R              | N.A.         | IM           | 178   | 34    | 38    | 170   |
|                        |              |      |         |              |          |          |                    |              | ELISA        | 193   | 66    | 23    | 140   |
| T Shimizu              | Japanese     | 2003 | Asia    | 68           | Children | Patient  | U, HpSA            | N.A.         | ELISA        | 12    | 13    | 1     | 42    |
| Antone R. Opekun       | American     | 2004 | America | 188          | Adult    | Patient  | U,S                | Yes          | IM           | 72    | 0     | 8     | 87    |
| Fu-Chen Kuo            | Chinese      | 2005 | Asia    | 317          | MIX      | Patient  | C,R,H,U            | N.A.         | ELISA        | 211   | 8     | 19    | 79    |
| Francis Megraud        | European     | 2005 | Europe  | 316          | Children | Patient  | C,H,R              | Yes          | ELISA        | 86    | 4     | 50    | 176   |
|                        |              |      |         |              |          |          |                    |              | IM           | 36    | 2     | 83    | 151   |
| Yanfeng Gong           | Chinese      | 2005 | Asia    | 215          | MIX      | Patient  | U                  | Yes          | ELISA        | 80    | 19    | 16    | 100   |
| Chien-Yu Lu            | Chinese      | 2006 | Asia    | 120          | NA       | Patient  | C,HE,R,U           | Yes          | IM           | 54    | 6     | 8     | 52    |
| Khitam Muhsen          | Israeli Arab | 2006 | Asia    | 159          | Children | healthy  | HpSA               | N.A.         | ELISA        | 27    | 3     | 52    | 77    |
| Lam Tung Nguyen        | Vietnamese   | 2010 | Asia    | 148          | MIX      | Patient  | C,IM,S             | Yes          | IM           | 66    | 6     | 17    | 59    |
| Demray Gürbüz E        | Turks        | 2012 | Asia    | 124          | Adult    | Patient  | C,H,R              | Yes          | IM           | 61    | 8     | 21    | 34    |
|                        |              |      |         |              |          |          |                    |              | ELISA        | 61    | 8     | 21    | 34    |
| Masumi Okuda           | Japanese     | 2013 | Asia    | 101          | Children | healthy  | U, HpSA            | Yes          | ELISA        | 34    | 2     | 3     | 62    |
|                        |              |      |         |              |          |          |                    |              | IM           | 29    | 0     | 7     | 64    |
| Duc T Quach            | Vietnamese   | 2014 | Asia    | 200          | Adult    | Patient  | R,H                | N.A.         | IM           | 94    | 9     | 17    | 80    |

C:culture, H: histology,R: rapid urease test,IM:immunochromatographic technique, S:serology;

Table 2. Summary of QUADAS-2 assessments of included studies

| Author                 | 1 | 2 | 3 | 4 | 5 | 6 | 7 | 8 | 9 | 10 | 11 | 12 | 13 | 14 | Quantity |
|------------------------|---|---|---|---|---|---|---|---|---|----|----|----|----|----|----------|
| Mohammad M             | N | Y | Y | Y | U | Y | N | Y | U | N  | U  | Y  | Y  | Y  | 8        |
| Kiyonri Katsuragi      | N | Y | Y | Y | U | Y | N | Y | U | N  | U  | Y  | Y  | Y  | 8        |
| Hiroto Miwa            | N | Y | Y | Y | Y | Y | N | Y | Y | N  | Y  | Y  | Y  | Y  | 11       |
| Mototsugu Kato         | U | Y | Y | Y | U | Y | N | Y | U | N  | U  | Y  | Y  | Y  | 8        |
| Soichiro Yamamoto      | U | Y | Y | Y | U | Y | N | Y | U | N  | Y  | Y  | Y  | Y  | 8        |
| D. Y. Graham           | N | Y | Y | Y | Y | Y | N | Y | Y | N  | U  | Y  | Y  | Y  | 10       |
| Toru Fujisawa          | U | Y | Y | Y | U | Y | N | Y | U | N  | U  | Y  | Y  | Y  | 8        |
| Hiroto Miwa            | Y | Y | Y | Y | U | Y | N | Y | U | N  | Y  | Y  | Y  | Y  | 10       |
| Kyoichi Adachi         | N | Y | Y | Y | Y | Y | N | Y | Y | N  | Y  | Y  | Y  | Y  | 11       |
| W. M. WONG             | U | Y | Y | Y | Y | Y | N | Y | Y | N  | U  | Y  | Y  | Y  | 10       |
| Youke Lu               | Y | Y | Y | Y | U | Y | N | Y | U | N  | Y  | Y  | Y  | Y  | 10       |
| A. LEODOLTER, D. VAIRA | N | Y | Y | Y | U | Y | N | Y | U | N  | U  | Y  | Y  | Y  | 8        |
| T Shimizu              | N | Y | Y | Y | U | Y | N | Y | U | N  | Y  | Y  | Y  | Y  | 9        |
| Antone R. Opekun       | Y | Y | Y | Y | U | Y | Y | Y | Y | Y  | Y  | Y  | Y  | Y  | 13       |
| Fu-Chen Kuo            | N | Y | Y | Y | U | Y | N | Y | U | N  | Y  | Y  | Y  | Y  | 9        |
| Francis Megraud        | U | Y | Y | Y | Y | Y | N | Y | Y | N  | Y  | Y  | Y  | Y  | 11       |
| Chien-Yu Lu            | N | Y | Y | Y | Y | Y | N | Y | Y | N  | Y  | Y  | Y  | Y  | 11       |
| Yanfang Gong           | U | Y | N | Y | Y | Y | N | Y | Y | N  | U  | Y  | Y  | Y  | 9        |
| Khitam Muhsen          | N | Y | N | Y | U | Y | N | Y | U | N  | U  | Y  | Y  | Y  | 7        |
| Lam Tung Nguyen        | N | Y | Y | Y | Y | Y | N | Y | Y | N  | U  | Y  | Y  | Y  | 8        |
| Demiray Gürbüz E       | N | Y | Y | Y | U | Y | N | Y | Y | N  | U  | Y  | Y  | Y  | 8        |
| Masumi Okuda           | N | Y | Y | Y | Y | Y | N | Y | Y | N  | Y  | Y  | Y  | Y  | 9        |
| Duc T Quach            | U | Y | Y | Y | U | Y | N | Y | U | N  | U  | Y  | Y  | Y  | 8        |

Y:Yes;N:No;U:Unclear.

1. Was a consecutive or random sample of patients enrolled?
2. Was a case-control design avoided?
3. Did the study avoid inappropriate exclusions?
4. Are There Concerns That the Included Patients and Setting Do Not Match the Review Question?
5. Were the index test results interpreted without knowledge of the results of the reference standard?
6. If a threshold was used, was it prespecified?
7. Are There Concerns That the Index Test, Its Conduct, or Its Interpretation Differ From the Review Question?
8. Is the reference standard likely to correctly classify the target condition?
9. Were the reference standard results interpreted without knowledge of the results of the index test?
10. Are There Concerns That the Target Condition as Defined by the Reference Standard Does Not Match the Question?
11. Was there an appropriate interval between the index test and reference standard?
12. Did all patients receive the same reference standard?
13. Were all patients included in the analysis?
14. Could the patient flow have introduced bias?

Table 3. Group/ subgroup analysis of Pooled estimates with 95 % confidence interval for sensitivity, specificity, and positive and negative likelihood ratios

| Group/Subgroup     | Spearman P | Cochrane Q test      |        | Pooled Sensitivity<br>( 95%CI ) | Pooled Specificity<br>( 95%CI ) | Pooled Positive LR<br>( 95%CI ) | Pooled Negative NR<br>( 95%CI ) | AUC    |
|--------------------|------------|----------------------|--------|---------------------------------|---------------------------------|---------------------------------|---------------------------------|--------|
|                    |            | DOR ( 95%CI )        | P      |                                 |                                 |                                 |                                 |        |
| Overall            | 0.413      | 73(46.45-114.74)     | 0.0000 | 0.83(0.82-0.85)                 | 0.89(0.88-0.90)                 | 8.81(6.37-12.2)                 | 0.13(0.09-0.2)                  | 0.9551 |
| Age                |            |                      |        |                                 |                                 |                                 |                                 |        |
| Children           | 0.397      | 61.62(22.16-171.32)  | 0.0335 | 0.53(0.48-0.58)                 | 0.96(0.94-0.97)                 | 17.93(4.83-62.59)               | 0.35(0.22-0.58)                 | 0.9632 |
| Adult              | 0.732      | 85.12(29.81-243.06)  | 0.0000 | 0.87(0.84-0.89)                 | 0.91(0.88-0.94)                 | 8.13(4.61-14.33)                | 0.13(0.07-0.22)                 | 0.9593 |
| Region             |            |                      |        |                                 |                                 |                                 |                                 |        |
| Asian              | 0.724      | 73.75(43.38-125.38)  | 0.0000 | 0.86 ( 0.84-0.88 )              | 0.9 ( 0.88-0.92 )               | 7.74(5.77-10.39)                | 0.12(0.07-0.20)                 | 0.9553 |
| Europe and America | 0.645      | 73.75(29.26-125.38)  | 0.0000 | 0.80 ( 0.77-0.82 )              | 0.88(0.86-0.90)                 | 12.05 ( 5.22-27.8 )             | 0.16(0.07-0.38)                 | 0.9557 |
| Study population   |            |                      |        |                                 |                                 |                                 |                                 |        |
| Patient            | 0.616      | 54.29(34.07-86.51)   | 0.0000 | 0.84(0.82-0.85)                 | 0.87(0.85-0.89)                 | 7.17 ( 5.18-9.93 )              | 0.14 ( 0.09-0.23 )              | 0.9436 |
| Healthy            | 0.294      | 156.11(41.44-588.04) | 0.0073 | 0.75 ( 0.69-0.80 )              | 0.97(0.94-0.98)                 | 16.25 ( 6.94-38.06 )            | 0.13 ( 0.03-0.53 )              | 0.98   |
| Assay method       |            |                      |        |                                 |                                 |                                 |                                 |        |
| IM                 | 0.5940     | 82.94(41.62-165.29)  | 0.0000 | 0.81(0.78-0.83)                 | 0.92(0.90-0.94)                 | 9.81 ( 6.28-15.34 )             | 0.14 ( 0.07-0.28 )              | 0.9584 |
| ELISA              | 0.7820     | 67.46(35.58-127.9)   | 0.0000 | 0.86(0.84-0.87)                 | 0.87(0.84-0.88)                 | 7.92(5.02-12.5)                 | 0.12 ( 0.07-0.23 )              | 0.9521 |

Table 4. Meta-regression of potential heterogeneity within the included studies

| Variables        | Coeff. | Std. Err. | P-value | RDOR | [95%CI]      |
|------------------|--------|-----------|---------|------|--------------|
| Cte.             | -0.98  | 3.4737    | 0.781   | ---- | ----         |
| S                | 0.309  | 0.1614    | 0.0706  | ---- | ----         |
| Region           | -0.459 | 0.8022    | 0.574   | 0.63 | (0.12;3.39)  |
| Sample size      | -0.001 | 0.0041    | 0.8856  | 1    | (0.99;1.01)  |
| Age              | -0.093 | 0.2489    | 0.7117  | 0.91 | (0.54;1.53)  |
| Study population | 1.367  | 0.5326    | 0.0189  | 3.92 | (1.29;11.96) |
| blinded design   | 0.144  | 0.6537    | 0.8282  | 1.15 | (0.29;4.54)  |
| Assay method     | 0.008  | 0.4155    | 0.9841  | 1.01 | (0.42;2.41)  |
| quantity         | 0.518  | 0.22      | 0.0295  | 1.68 | (1.06;2.66)  |

Coeff:Constant Coefficient; Std. Err.Standard Error; RDOR:Relative diagnostic odd ratio.

For peer review only

1  
2  
3  
4  
5  
6  
7  
8  
9  
10  
11  
12  
13  
14  
15  
16  
17  
18  
19  
20  
21  
22  
23  
24  
25  
26  
27  
28  
29  
30  
31  
32  
33  
34  
35  
36  
37  
38  
39  
40  
41  
42  
43  
44  
45  
46  
47  
48  
49  
50  
51  
52  
53  
54  
55  
56  
57  
58  
59  
60

For peer review only

1  
2  
3  
4  
5  
6  
7  
8  
9  
10  
11  
12  
13  
14  
15  
16  
17  
18  
19  
20  
21  
22  
23  
24  
25  
26  
27  
28  
29  
30  
31  
32  
33  
34  
35  
36  
37  
38  
39  
40  
41  
42  
43  
44  
45  
46  
47  
48  
49  
50  
51  
52  
53  
54  
55  
56  
57  
58  
59  
60

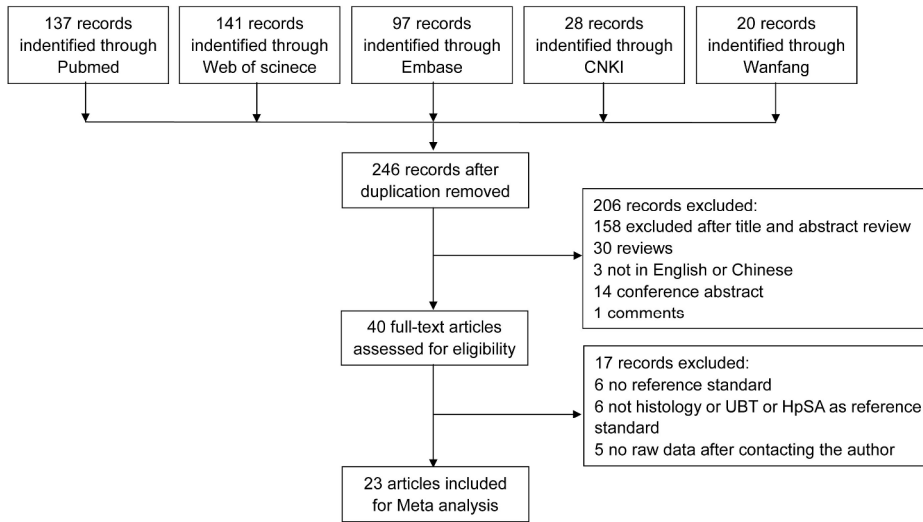

Fig 1. Flow diagram of the literature search.

253x131mm (300 x 300 DPI)

review only

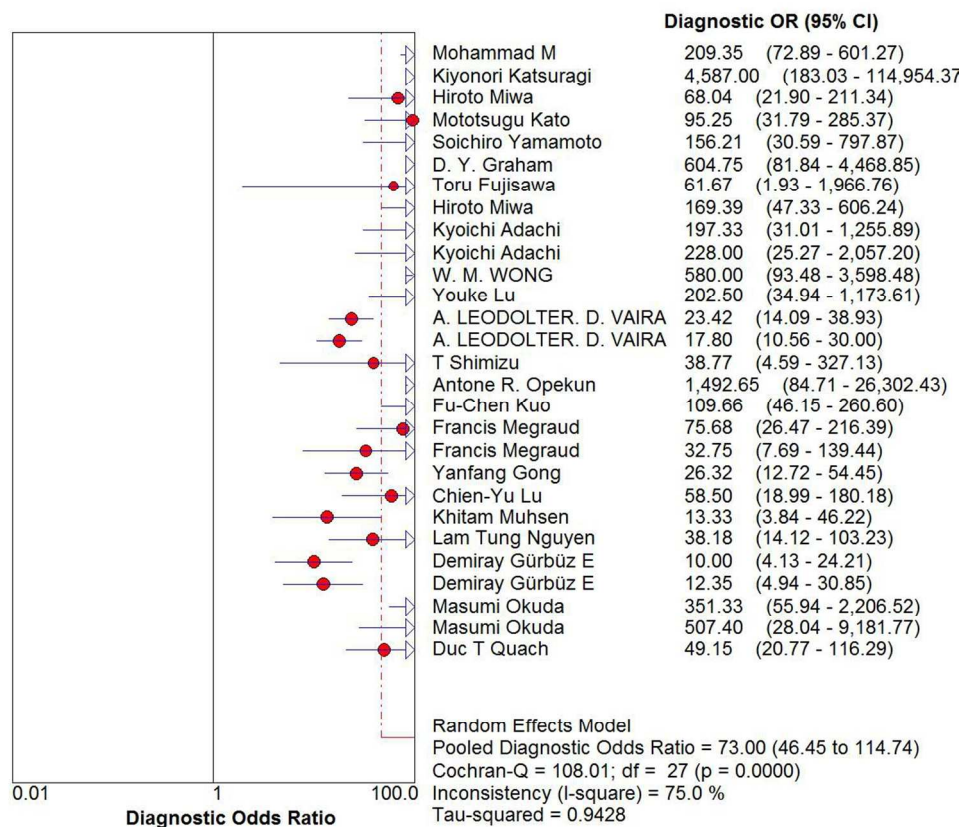

Fig 2. Forest plots of DOR for or H.pylori diagnosis by urine IgG antibody. The pooled diagnostic odds ratio was 73(95%CI: 46.45-114.74)

433x369mm (72 x 72 DPI)

only

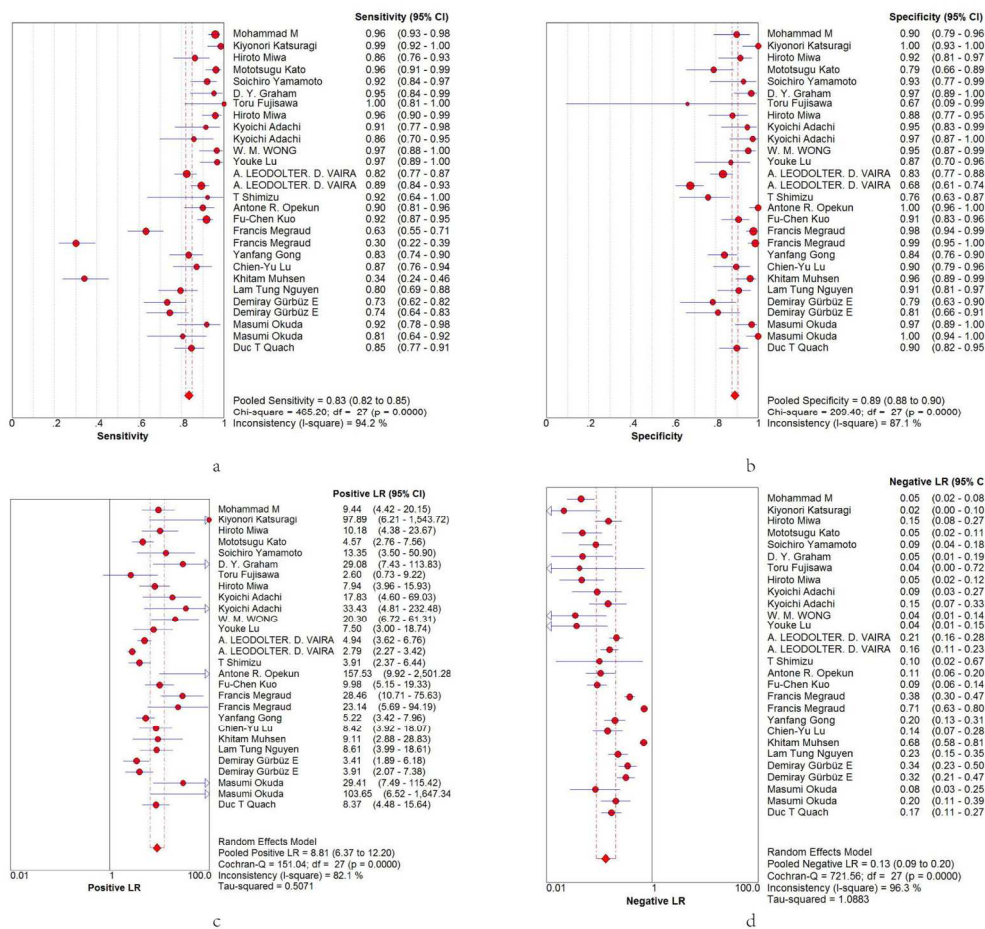

Fig 3. Forest plots of sensitivity, specificity, DLR+, and DLR- for H.pylori diagnosis by urine IgG antibody (a) The summary sensitivity was 0.83 (95% CI: 0.82–0.85; I2 = 94.4%); (b) The summary specificity was 0.89 (95% CI: 0.87–0.90; I2 = 86.1%); (c) The summary PLR was 8.5 (95% CI: 6.27–12.2; I2 = 81.0%); (d) The summary NLR of all articles was 0.13 (95% CI: 0.09–0.20; I2 = 96.3%).

150x140mm (300 x 300 DPI)



1  
2  
3 **Accuracy of testing for anti-*Helicobacter pylori* IgG<sup>1</sup> in urine for *H. pylori***  
4  
5 **infection diagnosis: systematic review and meta-analysis**  
6

7 Yuehua Gong, Li Qiuping, Yuan Yuan\*

8  
9  
10 *Department of Tumor Etiology and Screening, Cancer Institute and General Surgery, The First Affiliated*  
11 *Hospital of China Medical University and Key Laboratory of Cancer Etiology and Prevention, Liaoning*  
12 *Provincial Education Department, Shenyang 110001, China*  
13

14  
15 \*Correspondence should be addressed to Yuan Yuan; yyuan@mail.cmu.edu.cn  
16  
17  
18  
19

20 **Supplemental Figure legends**  
21

22  
23  
24 **Figure 1. Summary of QUADAS-2 assessments of included studies.**  
25

26  
27 **Fig 2. Summary receiver operating characteristic (SROC) curves and confidence interval**  
28 **for the diagnosis of *H.pylori* infection using IgG antibody in urine**  
29  
30

31  
32  
33 **Fig 3. Deek's funnel plot to assess the likelihood of publication bias.** The statistically non-  
34 significant P-value of 0.124 for the slope coefficient suggests symmetry in the data and a low  
35 likelihood of publication bias  
36  
37  
38  
39  
40  
41  
42  
43  
44  
45  
46  
47  
48  
49  
50  
51  
52  
53  
54  
55  
56  
57  
58  
59  
60

1  
2  
3  
4  
5  
6  
7  
8  
9  
10  
11  
12  
13  
14  
15  
16  
17  
18  
19  
20  
21  
22  
23  
24  
25  
26  
27  
28  
29  
30  
31  
32  
33  
34  
35  
36  
37  
38  
39  
40  
41  
42  
43  
44  
45  
46  
47  
48  
49  
50  
51  
52  
53  
54  
55  
56  
57  
58  
59  
60

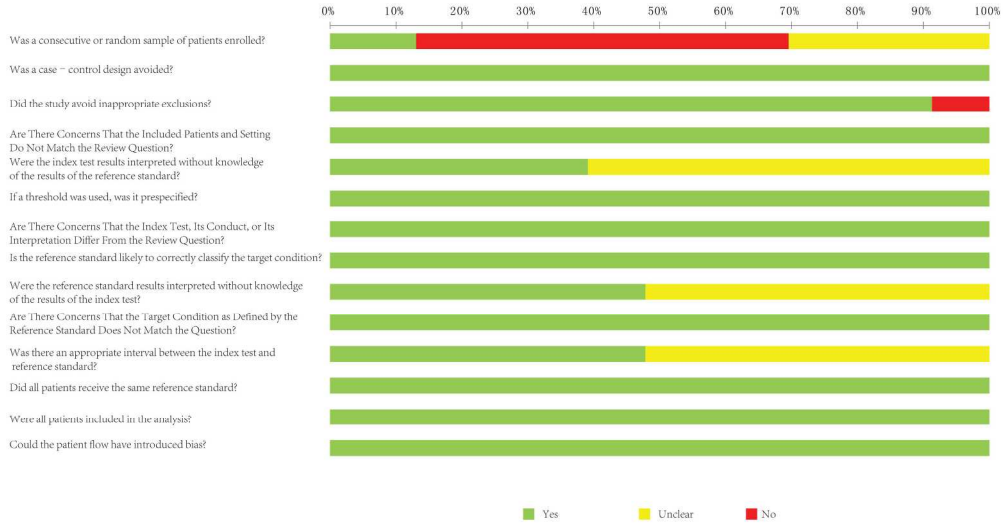

216x112mm (300 x 300 DPI)

review only

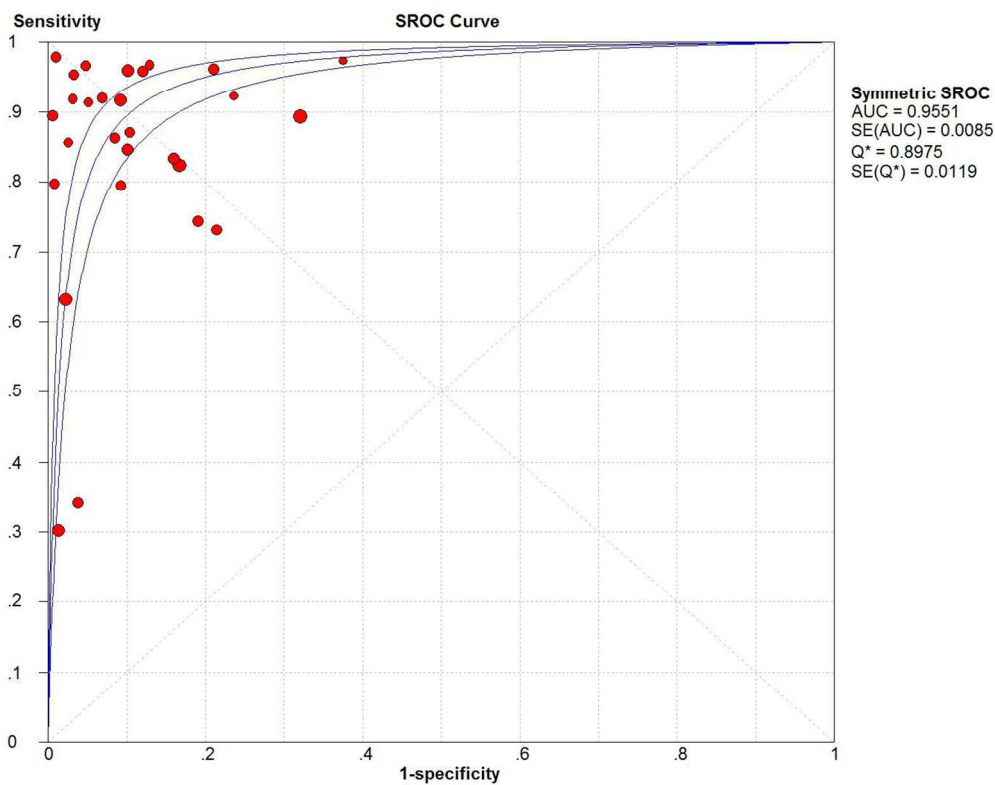

473x376mm (72 x 72 DPI)

For peer review only

1  
2  
3  
4  
5  
6  
7  
8  
9  
10  
11  
12  
13  
14  
15  
16  
17  
18  
19  
20  
21  
22  
23  
24  
25  
26  
27  
28  
29  
30  
31  
32  
33  
34  
35  
36  
37  
38  
39  
40  
41  
42  
43  
44  
45  
46  
47  
48  
49  
50  
51  
52  
53  
54  
55  
56  
57  
58  
59  
60

1  
2  
3  
4  
5  
6  
7  
8  
9  
10  
11  
12  
13  
14  
15  
16  
17  
18  
19  
20  
21  
22  
23  
24  
25  
26  
27  
28  
29  
30  
31  
32  
33  
34  
35  
36  
37  
38  
39  
40  
41  
42  
43  
44  
45  
46  
47  
48  
49  
50  
51  
52  
53  
54  
55  
56  
57  
58  
59  
60

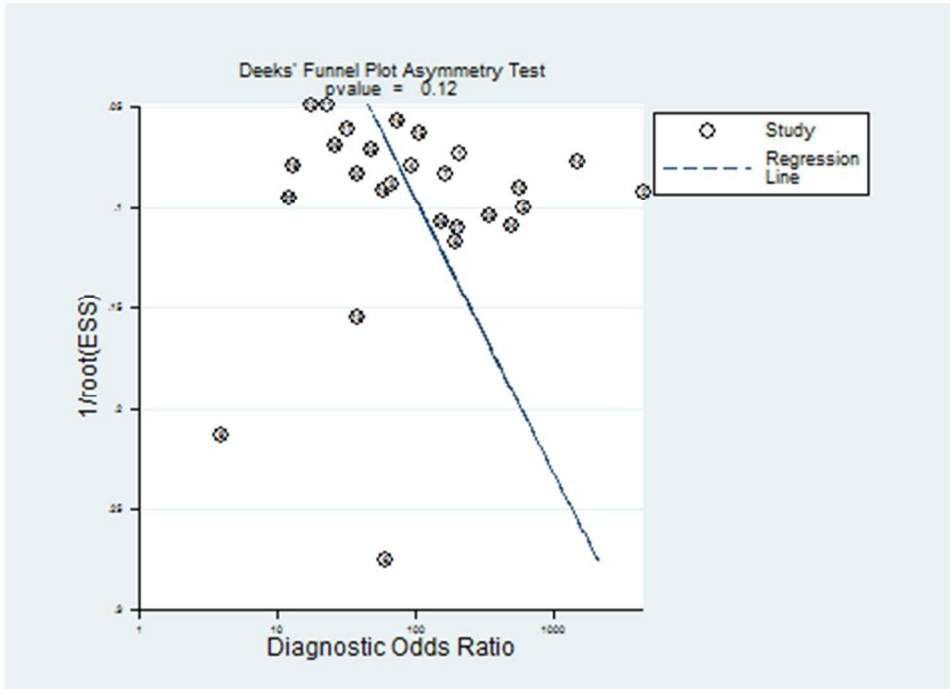

166x121mm (72 x 72 DPI)

View only

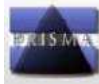

# PRISMA 2009 Checklist

| Section/topic                      | #  | Checklist item                                                                                                                                                                                                                                                                                              | Reported on page # |
|------------------------------------|----|-------------------------------------------------------------------------------------------------------------------------------------------------------------------------------------------------------------------------------------------------------------------------------------------------------------|--------------------|
| <b>TITLE</b>                       |    |                                                                                                                                                                                                                                                                                                             |                    |
| Title                              | 1  | Identify the report as a systematic review, meta-analysis, or both.                                                                                                                                                                                                                                         | 1                  |
| <b>ABSTRACT</b>                    |    |                                                                                                                                                                                                                                                                                                             |                    |
| Structured summary                 | 2  | Provide a structured summary including, as applicable: background; objectives; data sources; study eligibility criteria, participants, and interventions; study appraisal and synthesis methods; results; limitations; conclusions and implications of key findings; systematic review registration number. | 1                  |
| <b>INTRODUCTION</b>                |    |                                                                                                                                                                                                                                                                                                             |                    |
| Rationale                          | 3  | Describe the rationale for the review in the context of what is already known.                                                                                                                                                                                                                              | 2                  |
| Objectives                         | 4  | Provide an explicit statement of questions being addressed with reference to participants, interventions, comparisons, outcomes, and study design (PICOS).                                                                                                                                                  | 2,3                |
| <b>METHODS</b>                     |    |                                                                                                                                                                                                                                                                                                             |                    |
| Protocol and registration          | 5  | Indicate if a review protocol exists, if and where it can be accessed (e.g., Web address), and, if available, provide registration information including registration number.                                                                                                                               |                    |
| Eligibility criteria               | 6  | Specify study characteristics (e.g., PICOS, length of follow-up) and report characteristics (e.g., years considered, language, publication status) used as criteria for eligibility, giving rationale.                                                                                                      | 3                  |
| Information sources                | 7  | Describe all information sources (e.g., databases with dates of coverage, contact with study authors to identify additional studies) in the search and date last searched.                                                                                                                                  | 3,4                |
| Search                             | 8  | Present full electronic search strategy for at least one database, including any limits used, such that it could be repeated.                                                                                                                                                                               | 3                  |
| Study selection                    | 9  | State the process for selecting studies (i.e., screening, eligibility, included in systematic review, and, if applicable, included in the meta-analysis).                                                                                                                                                   | 3                  |
| Data collection process            | 10 | Describe method of data extraction from reports (e.g., piloted forms, independently, in duplicate) and any processes for obtaining and confirming data from investigators.                                                                                                                                  | 3,4                |
| Data items                         | 11 | List and define all variables for which data were sought (e.g., PICOS, funding sources) and any assumptions and simplifications made.                                                                                                                                                                       | 3,4                |
| Risk of bias in individual studies | 12 | Describe methods used for assessing risk of bias of individual studies (including specification of whether this was done at the study or outcome level), and how this information is to be used in any data synthesis.                                                                                      | 4                  |
| Summary measures                   | 13 | State the principal summary measures (e.g., risk ratio, difference in means).                                                                                                                                                                                                                               | 4                  |
| Synthesis of results               | 14 | Describe the methods of handling data and combining results of studies, if done, including measures of consistency (e.g., $I^2$ for each meta-analysis).                                                                                                                                                    | 4                  |

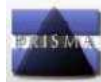

# PRISMA 2009 Checklist

Page 1 of 2

| Section/topic                 | #  | Checklist item                                                                                                                                                                                           | Reported on page # |
|-------------------------------|----|----------------------------------------------------------------------------------------------------------------------------------------------------------------------------------------------------------|--------------------|
| Risk of bias across studies   | 15 | Specify any assessment of risk of bias that may affect the cumulative evidence (e.g., publication bias, selective reporting within studies).                                                             | 4                  |
| Additional analyses           | 16 | Describe methods of additional analyses (e.g., sensitivity or subgroup analyses, meta-regression), if done, indicating which were pre-specified.                                                         | 4                  |
| <b>RESULTS</b>                |    |                                                                                                                                                                                                          |                    |
| Study selection               | 17 | Give numbers of studies screened, assessed for eligibility, and included in the review, with reasons for exclusions at each stage, ideally with a flow diagram.                                          | 4-5                |
| Study characteristics         | 18 | For each study, present characteristics for which data were extracted (e.g., study size, PICOS, follow-up period) and provide the citations.                                                             | 4-5                |
| Risk of bias within studies   | 19 | Present data on risk of bias of each study and, if available, any outcome level assessment (see item 12).                                                                                                |                    |
| Results of individual studies | 20 | For all outcomes considered (benefits or harms), present, for each study: (a) simple summary data for each intervention group (b) effect estimates and confidence intervals, ideally with a forest plot. | 5-7                |
| Synthesis of results          | 21 | Present results of each meta-analysis done, including confidence intervals and measures of consistency.                                                                                                  | 5-7                |
| Risk of bias across studies   | 22 | Present results of any assessment of risk of bias across studies (see Item 15).                                                                                                                          | 7-8                |
| Additional analysis           | 23 | Give results of additional analyses, if done (e.g., sensitivity or subgroup analyses, meta-regression [see Item 16]).                                                                                    | 6-7                |
| <b>DISCUSSION</b>             |    |                                                                                                                                                                                                          |                    |
| Summary of evidence           | 24 | Summarize the main findings including the strength of evidence for each main outcome; consider their relevance to key groups (e.g., healthcare providers, users, and policy makers).                     | 8-9                |
| Limitations                   | 25 | Discuss limitations at study and outcome level (e.g., risk of bias), and at review-level (e.g., incomplete retrieval of identified research, reporting bias).                                            | 9-10               |
| Conclusions                   | 26 | Provide a general interpretation of the results in the context of other evidence, and implications for future research.                                                                                  | 10                 |
| <b>FUNDING</b>                |    |                                                                                                                                                                                                          |                    |
| Funding                       | 27 | Describe sources of funding for the systematic review and other support (e.g., supply of data); role of funders for the systematic review.                                                               | 13                 |

From: Moher D, Liberati A, Tetzlaff J, Altman DG, The PRISMA Group (2009). Preferred Reporting Items for Systematic Reviews and Meta-Analyses: The PRISMA Statement. PLoS Med 6(6): e1000097. doi:10.1371/journal.pmed1000097

For more information, visit: [www.prisma-statement.org](http://www.prisma-statement.org).

Page 2 of 2

For peer review only - <http://bmjopen.bmj.com/site/about/guidelines.xhtml>

# BMJ Open

## Accuracy of testing for anti-Helicobacter pylori IgG in urine for H. pylori infection diagnosis: systematic review and meta-analysis

|                                 |                                                                                                                                                                                                                                                                                                                                                                                                                                        |
|---------------------------------|----------------------------------------------------------------------------------------------------------------------------------------------------------------------------------------------------------------------------------------------------------------------------------------------------------------------------------------------------------------------------------------------------------------------------------------|
| Journal:                        | <i>BMJ Open</i>                                                                                                                                                                                                                                                                                                                                                                                                                        |
| Manuscript ID                   | bmjopen-2016-013248.R1                                                                                                                                                                                                                                                                                                                                                                                                                 |
| Article Type:                   | Research                                                                                                                                                                                                                                                                                                                                                                                                                               |
| Date Submitted by the Author:   | 16-Feb-2017                                                                                                                                                                                                                                                                                                                                                                                                                            |
| Complete List of Authors:       | Gong, Yuehua; Cancer Institute and General Surgery, The First Affiliated Hospital of China Medical University , Department of Tumor Etiology and Screening<br>Li, Qiuping; Cancer Institute and General Surgery, The First Affiliated Hospital of China Medical University , Department of Tumor Etiology and Screening<br>Yuan, Yuan; Cancer Institute and General Surgery, The First Affiliated Hospital of China Medical University |
| <b>Primary Subject Heading</b>: | Gastroenterology and hepatology                                                                                                                                                                                                                                                                                                                                                                                                        |
| Secondary Subject Heading:      | Infectious diseases, Gastroenterology and hepatology                                                                                                                                                                                                                                                                                                                                                                                   |
| Keywords:                       | H.pylori, urine IgG antibody, diagnosis, Meta analysis                                                                                                                                                                                                                                                                                                                                                                                 |
|                                 |                                                                                                                                                                                                                                                                                                                                                                                                                                        |

SCHOLARONE™  
Manuscripts

Only

1  
2  
3 **Accuracy of testing for anti-*Helicobacter pylori* IgG in urine for *H. pylori* infection**  
4  
5 **diagnosis: a systematic review and meta-analysis**  
6

7 Yuehua Gong, Li Qiuping, Yuan Yuan\*

8  
9 *Department of Tumor Etiology and Screening, Cancer Institute and General Surgery, The First Affiliated Hospital of China*  
10 *Medical University and Key Laboratory of Cancer Etiology and Prevention, Liaoning Provincial Education Department,*  
11 *Shenyang 110001, China*  
12

13  
14 \*Correspondence should be addressed to Yuan Yuan; yuanyuan@cmu.edu.cn  
15

16  
17 **Abstract**  
18

19 **Objectives:** This meta-analysis aims to systematically measure the potential diagnostic value  
20 of anti-*H. pylori* IgG in urine for infection diagnosis, using all eligible studies published in  
21 English and Chinese language.  
22

23 **Design:** The random effect model was used to analyze the pooled sensitivity, specificity,  
24 positive likelihood ratio (PLR), negative LR (NLR), diagnostic odds ratio (DOR), together with  
25 the summary receiver operator characteristic (SROC) curve.  
26

27 **Setting:** Literature searches of databases including PubMed, EMBASE, MEDLINE, Web of  
28 Science, Chinese National Knowledge Infrastructure (CNKI) and Wanfang Databases were  
29 performed to retrieve studies evaluating the diagnostic value of urine IgG antibody for  
30 *H.pylori* infection.  
31

32 **Primary outcome measure:** Twenty-three studies with 4,963 subjects were included in the  
33 current meta-analysis.  
34

35 **Results:** The pooled sensitivity, specificity, PLR, NLR, DOR, and AUC were 0.83 (95% CI,  
36 0.82-0.85), 0.89 (95% CI, 0.88-0.90), 8.81 (95% CI, 6.37-12.2), 0.13 (95% CI, 0.09-0.2), 73 (95%  
37 CI, 46.45-114.74), and 0.9551, respectively. Subgroup analyses showed that diagnostic  
38 accuracy of the urine IgG assay was different in the study population.  
39

40 **Conclusions:** Anti-*H.pylori* antibody in urine might serve as a good marker in diagnosing  
41 *H.pylori* infection. However, further validation based on a larger sample is still required.  
42  
43  
44  
45  
46  
47  
48  
49  
50  
51  
52  
53  
54  
55  
56  
57  
58  
59  
60



### Strengths and limitations of this study

1. A comprehensive search of literature databases was performed to identify all eligible studies that reported the diagnostic performance of an anti-*Helicobacter pylori* antibody in urine.
2. The systematic meta-analysis used a standard protocol, strict inclusion criteria, standardized data extraction, and independent reviewers.
3. We first assessed the summary predictive value of anti-*H. pylori* IgG in urine for infection diagnosis, and additional subgroup analyses based on study population, region, age, and assay method were used to explore heterogeneity.
4. Unpublished research such as conference papers and studies published in languages other than English or Chinese were not included in this meta-analysis, so some relevant research may have been missed.
5. We selected the cut-off value according to the manufacturer's recommendations, but this may not have been the most appropriate for specific areas.

## Introduction

Helicobacter pylori (*H. pylori*) is a bacterium that chronically infects more than half of the world's population and plays a causative role in the pathogenesis of chronic gastritis, peptic ulcer diseases, gastric cancer, and mucosa-associated lymphoid tissue lymphoma [1-4]. The considerable burden of these *H. pylori*-related outcomes means that there is an acute demand for accurate diagnosis of this infection. Several detection methods have already been developed, such as culture, histological staining, the urea breath test (UBT), and the *H. pylori* stool antigen test (HpSA), but a simple, non-invasive, inexpensive, and accurate diagnostic test remains the goal.

A number of methods have been developed for non-invasive *H. pylori* infection diagnosis using body fluids. Tests for the detection of serum anti-*H. pylori* antibodies are widely used because they are relatively straightforward, convenient, and economical. Several studies have also reported the presence of specific anti-*H. pylori* antibodies in body fluids other than serum [5,6]. For example, anti-*H. pylori* immunoglobulin (Ig)G is detectable in urine and has been used for the diagnosis of *H. pylori* infection. If urine samples could be used for the sensitive screening of *H. pylori* infection, this would be more convenient both for clinical practice and mass screening.

In 1993, Alemohammad *et al.* reported that the enzyme-linked immunosorbent assay (ELISA) was both highly sensitive and specific for the detection of anti-*H. pylori* antibodies in urine. This was confirmed by another study from Japan [7]. These studies laid the groundwork for the development of a urine-based ELISA kit and a rapid immunochromatography (IM) assay for *H. pylori* diagnosis [8]. Evaluation of the IM assay in Japanese asymptomatic adults and patients with gastric disorders showed promising results compared with UBT (sensitivity: 86.3%–99%; specificity: 91.5%–100%) [8,9]. The use of ELISA to detect *H. pylori* in Japanese children also revealed high levels of sensitivity and specificity. When compared with <sup>13</sup>C-UBT and/or HpSA, the ELISA sensitivity ranged from 92.3%–94.4%, and specificity from 76.4%–96.9% [10,11]. Different findings were recorded, however, for the same kit when compared with gastrointestinal endoscopic testing for *H. pylori*, in line with European multicentre studies. Sensitivity and specificity in adults were 89.4% and 68%, respectively [12], and the corresponding figures in children were 63.2% and 97.3%, respectively [13]. Subsequently, the accuracy and usefulness of the IM assay have been supported by several trials in different geographic areas, including Japan [14], Turkey [15], Hong Kong and Taiwan [16], the United States [17], and Europe [18].

These variations in the sensitivity and specificity of anti-*H. pylori* IgG urine testing

1  
2  
3 indicate the need for a comprehensive evaluation of the test performance before wider  
4 application. Therefore, this systematic review and meta-analysis was conducted to identify  
5 whether anti-*H. pylori* IgG in urine can serve as a valuable test for *H. pylori* diagnosis.  
6  
7  
8

## 9 10 **Methods**

### 11 ***Literature search strategy***

12  
13 Literatures of electronic databases including PubMed, EMBASE, MEDLINE, Web of  
14 Science, Chinese National Knowledge Infrastructure (CNKI) and Wanfang Databases were  
15 searched by two independent researchers to identify relevant studies that evaluate the  
16 diagnostic value of urine IgG antibody for *H.pylori* infection. The last search date was  
17 January 7, 2016. The following search terms (in Title, Abstract or keywords fields) were  
18 combined using Boolean rules: '*H.pylori*', '*Helicobacter pylori*', 'urine IgG antibody',  
19 'urine antibody' (Supplemental Figure 1) , with a filter for human studies published in  
20 English or Chinese. Two researchers (Yuehua Gong and Qiuping Li) screened all the titles  
21 and abstracts; studies including data on *H. pylori* and urine IgG levels were read in full text.  
22 The reference lists of the selected papers were hand-searched to identify additional available  
23 papers. When multiple publications presented results using the same patient cohort, the most  
24 recent or the most complete publication was selected for inclusion. Review articles and  
25 references of the accepted articles were searched for additional papers.  
26  
27  
28  
29  
30  
31  
32  
33  
34  
35

### 36 ***Literature selection criteria***

37  
38 We included studies that met the following criteria: (1) Anti-*H.pylori* IgG antibody in  
39 urine was detected; (2) Investigation of the diagnostic accuracy of urine IgG of *H.pylori*  
40 compared to culture or histopathology or UBT or HpSA (based on only one or at least two  
41 reference methods); (3) Sensitivity, specificity, and cut-off values can be found in identified  
42 studies or calculated from the provided data; (4) Publication with full text in a peer-reviewed  
43 scientific journal. While the exclusion criteria were listed as follows: (1) studies with  
44 insufficient data to construct the 2\*2 table; (2) Reviews, letters, and conference abstracts; and  
45 (3) publications identified as duplicates. If a study fulfilled the eligibility criteria, it was  
46 included in the systematic review. Any discrepancies were resolved with discussion.  
47  
48  
49  
50  
51  
52  
53  
54

### 55 **Data extraction and Quality Assessment of Diagnostic Accuracy Studies (QUADAS)-2** 56 **assessment** 57 58 59 60

1  
2  
3 The following variables were extracted from the original studies in a predefined data  
4 extraction form (see Table 1): author, ethnicity, year of publication, number of cases, age  
5 (adults or children), study population (patients or healthy), reference standard, and assay  
6 method (ELISA or IM technique). True positives (TP), false positives (FP), false negatives  
7 (FN), and true negatives (TN) for urine IgG antibody diagnose were included. Extraction of  
8 studies was performed independently by two reviewers (Yuehua Gong and Qiuping Li).  
9 Discrepancies were discussed with the third researcher (Yuan Yuan) and agreement was  
10 eventually reached. If a study was selected for the systematic review but did not provide data  
11 that could be included in the meta-analysis, the authors were contacted via e-mail. If the  
12 authors did not reply or did not provide the requested information, then this article would be  
13 excluded. QUADAS-2 summary plots were outlined in Table 2 and Supplemental Figure 2  
14 [19].  
15  
16  
17  
18  
19  
20  
21  
22  
23

### 24 *Statistical analysis*

25  
26 The following parameters representing test accuracy were calculated based on the data  
27 (TP, FP, FN, and TN) we extracted from each included studies: the pooled sensitivity,  
28 specificity, PLR, NLR, DOR, and corresponding 95% confidence intervals (95% CI).  
29 Simultaneously, the SROC was also assessed. The heterogeneity was measured by Q test and  
30 the inconsistency index ( $I^2$ ), and  $P < 0.05$  and  $I^2 > 50\%$  indicated significant heterogeneity  
31 among studies. The random-effect model (DerSimonian-Laird method) was conducted for the  
32 meta-analysis to calculate the pooled sensitivity, specificity, and other related indexes of the  
33 studies, and meta-regression was performed to detect the source of the heterogeneity;  
34 otherwise, the fixed-effect model (MantelHaenszel method) was chosen.  
35  
36  
37  
38  
39  
40

41 In addition, the Spearman correlation coefficient was used to verify if the heterogeneity  
42 in meta-analysis could be explained by a threshold effect, which was defined as a positive  
43 correlation ( $P < 0.05$ ). Subgroup analyses were performed for region, age, study population  
44 and assay method. The differences between subgroups were compared by Z test. The formula  
45 was  $Z = |AUC1 - AUC2| / \sqrt{SE1^2 + SE2^2}$ . Deek's Funnel Plot Asymmetry Test was  
46 applied to determine the presence of publication bias using STATA 12.1 software (Stata Corp.,  
47 College Station, Texas, USA.) [20]. MetaDisc (version 1.4) software [21] was also used to  
48 calculate other parameters of diagnostic performance. All  $P$  values were two-sided, and  $P <$   
49  $0.05$  was considered statistically significant.  
50  
51  
52  
53  
54  
55  
56  
57  
58  
59  
60

## Results

### Search results

This meta-analysis was organized according to the PRISMA statement (Supplemental file 1). Figure 1 summarizes the search process and numerical selection of the final papers that were included in the systematic review and meta-analysis. A systematic search of biomedical databases resulted in 423 hits, and after excluding duplicates, 246 citations were identified. No unpublished literature relevant to the topic was identified. Forty papers were selected based on their abstracts and titles and were read in full for eligibility. Two eligible studies referred to the same study group; hence, only one of these was included in the systematic review [10,18]. Twenty-four individual studies fulfilled the eligibility criteria and were included in the systematic review [7-9,11,12,14-18],[13,22-31]. Of these, 23 studies had extractable data after contacting the authors and were included in the meta-analysis [7-9][11-13,15-18,22-24,26,28,30-33]. A flowchart detailing the study selection process is shown in Figure 1.

### Study characteristics

Baseline characteristics of the eligible studies are summarized in Table 1. A total of 23 studies with 4963 participants were included in the meta-analysis. Of these, three were conducted in the United States [7,17,23], two in Europe [12,13], and the remaining 18 in Asia. All eligible studies were published between 2000 and 2014. Sample sizes ranged from 21–449. Urinary *H. pylori* IgG was detected using ELISA in nine studies, using IM in nine studies, and using both assays in five studies. Key data were successfully extracted from all studies, including TPs, FPs, FNs, and TNs. The number of TPs ranged from 12–237, FNs from 0–83, FPs from 0–66, and TNs from 2–176.

### Diagnostic accuracy and threshold analysis

Spearman's correlation coefficient was first used to determine the existence of the threshold effect because it is an important source of heterogeneity. The Spearman's correlation coefficient for sensitivity and 1-specificity in the meta-analysis was 0.161, with a *P*-value of 0.413, suggesting no heterogeneity from the threshold effect. Heterogeneity was measured using the Q test and the inconsistency index ( $I^2$ ) to choose the appropriate calculation model. Significant heterogeneity was detected in the pooled diagnostic odds ratio (DOR) (DOR = 73,  $I^2 = 75\%$ ,  $P = 0.0000$ ) (Figure 2). Therefore, the random effects model was used to calculate sensitivity, specificity, the positive likelihood ratio (PLR), and DOR.

1  
2  
3 Based on TP, TN, FP, and FN data extracted from the included studies, we evaluated  
4 the diagnostic accuracy of urinary IgG in *H. pylori* diagnosis from the following quantitative  
5 parameters: pooled sensitivity and specificity were 0.83 (95% CI: 0.82–0.85; Figure 3a) and  
6 0.89 (95% CI: 0.88–0.90; Figure 3b), respectively; pooled PLR and negative likelihood ratio  
7 (NLR) were 8.81 (95% CI: 6.37–12.2; Figure 3c) and 0.13 (95% CI: 0.09–0.2; Figure 3d),  
8 respectively. The summary receiver operating characteristic (sROC) curve for urinary IgG  
9 was positioned near the desirable upper left corner, and the area under the curve (AUC) was  
10 0.9551, indicating that the level of overall accuracy was high (Supplemental Figure 3).  
11  
12  
13  
14  
15  
16  
17

### 18 **Subgroup analysis**

19 Subgroup analysis was conducted based on age, region, study population, and assay method.  
20 Pooled results are shown in Table 3. A random effects model was used because significant  
21 heterogeneity was observed (all  $I^2 > 50\%$ ). A two-sample Z-test was conducted to evaluate  
22 significant differences in AUC values between any two subgroups.  
23  
24  
25  
26  
27

### 28 **Age analysis**

29 Seven studies containing 1047 adults (>17 years of age) were evaluated. Pooled sensitivity,  
30 specificity, PLR, and NLR were 0.87 (95% CI: 0.84–0.89), 0.91 (95% CI: 0.88–0.94), 8.13  
31 (95% CI: 4.61–14.33), and 0.13 (95% CI: 0.07–0.22), respectively, with a DOR of 85.12 and  
32 an AUC value of 0.9593. The diagnostic performance of urinary IgG was evaluated for young  
33 people in the four other studies containing 644 children ( $\leq 17$  years of age). Pooled sensitivity,  
34 specificity, PLR, and NLR were 0.53 (95% CI: 0.48–0.58), 0.96 (95% CI: 0.94–0.97), 17.93  
35 (95% CI: 4.83–62.59), and 0.35 (95% CI: 0.22–0.58), respectively, with a DOR of 61.62 and  
36 an AUC value of 0.9632. There was no significant difference in the AUC values between  
37 adults and children ( $P > 0.05$ ).  
38  
39  
40  
41  
42  
43  
44  
45

### 46 **Regional analysis**

47 Of the 23 included studies, five were from Europe or the United States and the remaining 18  
48 were from Asia. For studies from Europe and the United States, the analysis showed a pooled  
49 sensitivity of 0.80 (95% CI: 0.77–0.82) and a pooled specificity of 0.88 (95% CI: 0.86–0.90).  
50 Combined PLR was 12.05 (95% CI: 5.22–27.8), NLR was 0.16 (95% CI: 0.07–0.38), and  
51 AUC and DOR were 0.9557 and 73.75, respectively. For studies from Asia, the pooled  
52 sensitivity was 0.86 (95% CI: 0.84–0.88) and the pooled specificity was 0.9 (95% CI:  
53 0.88–0.92). Combined PLR was 7.74 (95% CI: 5.77–10.39), NLR was 0.12 (95% CI:  
54  
55  
56  
57  
58  
59  
60

0.07–0.2), DOR was 73.75, and AUC was 0.9553. There was no significant difference in the AUC values between Europe or the United States and Asia ( $P>0.05$ ).

### Study population analysis

Study population analysis, of both patients and healthy controls, was performed in the systematic review. A total of 16 patient studies and five studies of healthy controls or individuals with no upper abdominal symptoms were evaluated. In the patient population, pooled sensitivity, specificity, PLR, and NLR were 0.84 (95% CI: 0.82–0.85), 0.87 (95% CI: 0.85–0.89), 7.17 (95% CI: 5.18–9.93), and 0.14 (95% CI: 0.09–0.23), respectively, with a DOR of 54.29 and AUC value of 0.9436. In the healthy population, pooled sensitivity, specificity, PLR, and NLR were 0.75 (95% CI: 0.69–0.80), 0.97 (95% CI: 0.94–0.98), 16.25 (95% CI: 6.94–38.06), and 0.13 (95% CI: 0.03–0.53), respectively, with a DOR of 156.11 and AUC value of 0.98. Except for pooled sensitivity, the diagnostic performance of the urine IgG assay was better for the healthy population than the patient population. Furthermore, there was a significant difference in AUC values between patients and controls ( $P<0.05$ ), suggesting that relatively high diagnostic accuracy can be achieved in the healthy population.

### Assay method analysis

Of all studies included, urinary *H. pylori* IgG was detected using ELISA in nine, IM in nine, and both assays in five. For studies that used ELISA, the pooled sensitivity was 0.86 (95% CI: 0.84–0.87) and pooled specificity was 0.87 (95% CI: 0.84–0.88). Combined PLR was 7.92 (95% CI: 5.02–12.5), NLR was 0.12 (95% CI: 0.07–0.23), and AUC and DOR were 0.9521 and 67.46, respectively. For studies that used IM, pooled sensitivity, specificity, PLR, and NLR were 0.81 (95% CI: 0.78–0.83), 0.92 (95% CI: 0.89–0.93), 9.81 (95% CI: 6.28–15.34), and 0.14 (95% CI: 0.07–0.28), respectively, with a DOR of 82.94 and AUC value of 0.9584. No significant difference was detected between ELISA and IM for the diagnostic accuracy of urine antibody detection.

### Meta-regression analysis

Heterogeneity was found in summary estimates for sensitivity, specificity, PLR, NLR, and DOR. Therefore, meta-regression was conducted to examine the source of heterogeneity based on region, sample size, age, study population, blind design, quality of study, and assay method. The results indicated that study population and quality of study were the important factors contributing to heterogeneity ( $P = 0.0189$  and  $P = 0.0295$ , respectively) (Table 4).

### Publication bias

Because publication bias is recognized as an important factor that influences the results of meta-analyses [34], the Deeks' funnel plot asymmetry test was performed to examine publication bias (Supplemental Figure 4). The test returned a *P*-value of 0.124, suggesting no significant publication bias was found in the pooled analysis of the studies.

### Discussion

Non-invasive tests for the assessment of *H. pylori* status have become part of patient management strategies [35-37]. Preliminary studies have explored the diagnostic accuracy of testing for anti-*H. pylori* antibodies in urine, but the results are inconclusive. In the present study, we performed comprehensive database searches for all eligible studies reporting the diagnostic accuracy of testing for anti-*H. pylori* antibodies in urine. Our meta-analysis was strengthened by the use of a standard protocol, strict inclusion criteria, standardized data extraction, and independent reviewers. To the best of our knowledge, this is the first study assessing the summary predictive value of anti-*H. pylori* IgG in urine for infection diagnosis.

Anti-*H. pylori* IgG in urine is detectable and has been used for the diagnosis of *H. pylori* infection, but a comprehensive evaluation of the test performance is needed before its wider application. After pooling data, we obtained a pooled sensitivity of 0.83 and a pooled specificity of 0.89, which represent good markers for *H. pylori* diagnosis. The sROC curve, which assesses overall test performance by showing the trade-off between sensitivity and specificity [38,39], had an AUC of 0.9551, suggesting a good level of accuracy. Another indicator of diagnostic accuracy is DOR, which combines sensitivity and specificity data into a single number ranging from 0 to infinity, with higher values indicating better discriminatory test performances [40]. The mean DOR in the meta-analysis was 73, suggesting that testing for anti-*H. pylori* antibodies in urine should be helpful in the diagnosis of *H. pylori* infection. We further examined the diagnostic accuracy of an anti-*H. pylori* antibody in urine by calculating the PLR and NLR, which can be easier to relate to clinical practice than sROC and DOR. The pooled PLR was 8.81 and the pooled NLR was 0.13, indicating that the presence of anti-*H. pylori* antibodies in urine has an important function in diagnosing *H. pylori* infection. Substantial heterogeneity was found with meta-analysis, so the random effects model was used to synthesize the above data. Our results show that anti-*H. pylori* IgG represents a good marker for the diagnosis of *H. pylori* infection.



1  
2  
3 Heterogeneity is an important factor that can affect the results of meta-analysis.  
4 Therefore, we used the Spearman's correlation coefficient to clarify whether the threshold  
5 effect contributed to the source of heterogeneity. The Spearman's correlation coefficient was  
6 0.193, with a *P*-value of 0.334, suggesting that heterogeneity among the included studies  
7 could not have been induced by the threshold effect. We further used subgroup analysis based  
8 on study population, region, age, and assay method to explore heterogeneity. No significant  
9 difference in age, region, or assay method was detected, but subgroup analysis for the study  
10 population revealed a significant difference in AUC values between patients and controls,  
11 suggesting a relatively high level of diagnostic accuracy in the healthy population. In  
12 meta-analysis, the patient population included dyspeptic, chronic gastritis, and peptic ulcer  
13 patients amongst others. It is possible that the disease condition in the stomach may cause a  
14 change in *H. pylori* colonization [41]. On the other hand, *H. pylori* IgG is not synchronized  
15 with the *H. pylori* infection process, so the delayed generation or disappearance of *H. pylori*  
16 colonization for several months may affect the level of anti-*H. pylori* IgG in the urine [42].  
17 Indeed, Graham *et al.* [23] reported that urine tests may remain positive for an extended time  
18 after successful treatment of the infection. This may be an important factor affecting the  
19 accuracy of the antibody test in the diseased population. The meta-regression analysis also  
20 demonstrated that study population was an important factor contributing to heterogeneity,  
21 which is consistent with subgroup analysis. These findings indicate that *H. pylori* infection  
22 diagnosis by anti-*H. pylori* IgG in the urine requires extra caution in diseased populations.  
23  
24  
25  
26  
27  
28  
29  
30  
31  
32  
33  
34  
35

36 The QUADAS tool was developed and evaluated by Whiting *et al.* [43] and is  
37 recommended by the Cochrane diagnostic accuracy systematic reviews [44] to provide a  
38 methodological assessment of the quality of diagnostic accuracy studies. Experience, reports  
39 from users, and feedback from the Cochrane Collaboration suggested the potential for  
40 improvements; therefore, QUADAS-2 was developed [19] and has been shown to be a  
41 considerable improvement over the original tool. The responses to QUADAS-2 signalling  
42 questions are assessed in terms of risk of bias or concerns regarding applicability. In the  
43 present meta-analysis, 23 of the included studies were qualified using QUADAS-2  
44 assessment, which included a score of 7 for one study, a score of 8 for nine studies, a score of  
45 9 for four studies, and a score of 10 or more for nine studies. Meta-regression analysis  
46 showed that the quality of included studies was another factor for heterogeneity. Therefore, a  
47 difference in diagnostic accuracy was present between low and high scoring studies  
48 according to regression analysis. This indicates that meta-analyses should include as many  
49 high-quality articles as possible to improve their accuracy.  
50  
51  
52  
53  
54  
55  
56  
57  
58  
59  
60

1  
2  
3 There are several limitations to our meta-analysis that should be borne in mind when  
4 interpreting the results. First, the studies included are not an exhaustive list because the  
5 search range was limited to published studies. Unpublished research, such as conference  
6 papers, cannot be obtained so it is possible that some relevant literature has been missed.  
7  
8 Additionally, only studies published in English or Chinese were included. Second, for articles  
9 that contained different cut-off values within the same study, we selected cut-off values  
10 according to the manufacturers' recommendations. However, these may not be the most  
11 appropriate values for specific areas.  
12  
13

14  
15  
16 In conclusion, testing for anti-*H. pylori* antibodies in urine appears to have an  
17 important function and represents a good marker for the diagnosis of *H. pylori* infection.  
18 Sources of heterogeneity were found to come from the quality of the studies included, and  
19 especially from the study population. The urine IgG assay also showed a higher level of  
20 diagnostic accuracy in healthy individuals compared with patients. Further large-scale,  
21 well-designed studies examining different study populations are required to confirm the  
22 results of this meta-analysis.  
23  
24  
25  
26  
27  
28

### 29 **Acknowledgements**

30  
31 This work was supported by a grant from Natural Science Foundation of Liaoning Province  
32 (201602822).  
33  
34  
35  
36  
37

### 38 **Author contributions**

39  
40 GYH and YY wrote the main manuscript text and LQP analyzed the data. All authors  
41 reviewed the manuscript.  
42  
43  
44  
45  
46

### 47 **Competing financial interests**

48  
49 The authors declare that they have no competing financial interests.  
50  
51  
52

### 53 **Data sharing statement**

54  
55 No additional unpublished data are available.  
56  
57  
58  
59  
60

## References

1. Covacci A, Telford JL, Del Giudice G, Parsonnet J, Rappuoli R (1999) *Helicobacter pylori* virulence and genetic geography. *Science* 284: 1328-1333.
2. Peek RM, Jr., Blaser MJ (2002) *Helicobacter pylori* and gastrointestinal tract adenocarcinomas. *Nat Rev Cancer* 2: 28-37.
3. Suerbaum S, Michetti P (2002) *Helicobacter pylori* infection. *N Engl J Med* 347: 1175-1186.
4. Plebani A, Notarangelo LD, Monafo V, Nespoli L, Ugazio AG (1984) A new immunoperoxidase assay for *Lolium perenne*-specific IgE in serum based on the biotin/avidin system (BAS). *Clin Allergy* 14: 373-378.
5. Yamamoto T, Tamura M, Ishii T, Anjiki H, Hattori K, et al. (2003) Urinary antibody titers to *Helicobacter pylori* and an impact of clinical characteristics. *J Clin Gastroenterol* 36: 329-331.
6. Yamamoto T, Kojima K, Sanaka M, Ishii T, Osaki Y, et al. (2006) Reliability of rapid urinary test for antibody to *Helicobacter pylori* in adult patients with proteinuria. *Diagn Microbiol Infect Dis* 54: 105-108.
7. Alemohammad MM, Foley TJ, Cohen H (1993) Detection of immunoglobulin G antibodies to *Helicobacter pylori* in urine by an enzyme immunoassay method. *J Clin Microbiol* 31: 2174-2177.
8. Katsuragi K, Noda A, Tachikawa T, Azuma A, Mukai F, et al. (1998) Highly sensitive urine-based enzyme-linked immunosorbent assay for detection of antibody to *Helicobacter pylori*. *Helicobacter* 3: 289-295.
9. Miwa H, Hirose M, Kikuchi S, Terai T, Iwazaki R, et al. (1999) How useful is the detection kit for antibody to *Helicobacter pylori* in urine (URINELISA) in clinical practice? *Am J Gastroenterol* 94: 3460-3463.
10. Okuda M, Nakazawa T, Booka M, Miyashiro E, Yosikawa N (2004) Evaluation of a urine antibody test for *Helicobacter pylori* in Japanese children. *J Pediatr* 144: 196-199.
11. Shimizu T, Yarita Y, Haruna H, Kaneko K, Yamashiro Y, et al. (2003) Urine-based enzyme-linked immunosorbent assay for the detection of *Helicobacter pylori* antibodies in children. *J Paediatr Child Health* 39: 606-610.
12. Leodolter A, Vaira D, Bazzoli F, Schutze K, Hirschl A, et al. (2003) European multicentre validation trial of two new non-invasive tests for the detection of *Helicobacter pylori* antibodies: urine-based ELISA and rapid urine test. *Aliment Pharmacol Ther* 18: 927-931.
13. Megraud F (2005) Comparison of non-invasive tests to detect *Helicobacter pylori* infection in children and adolescents: results of a multicenter European study. *J Pediatr* 146: 198-203.
14. Quach DT, Hiyama T, Shimamoto F, Le QD, Ho LX, et al. (2014) Value of a new stick-type rapid urine test for the diagnosis of *Helicobacter pylori* infection in the Vietnamese population. *World J Gastroenterol* 20: 5087-5091.
15. Demiray Gurbuz E, Gonen C, Bekmen N, Dolek D, Soy Turk M, et al. (2012) The diagnostic accuracy of urine IgG antibody tests for the detection of *Helicobacter pylori* infection in Turkish dyspeptic patients. *Turk J Gastroenterol* 23: 753-758.
16. Lu CY, Kuo FC, Wang SW, Lo YC, Wu IC, et al. (2006) The clinical applications and accuracy of 2 rapid near-patient tests in detecting *Helicobacter pylori* infection. *Diagn Microbiol Infect Dis* 56: 241-246.
17. Opekun AR, Luu P, Gotschall AB, Abdalla N, Torres E, et al. (2006) Point-of-care *Helicobacter pylori* urine antibody detection in a multi-ethnic adult population in the United States. *Transl Res* 148: 13-18.
18. Okuda M, Kamiya S, Booka M, Kikuchi S, Osaki T, et al. (2013) Diagnostic accuracy of urine-based kits for detection of *Helicobacter pylori* antibody in children. *Pediatr Int* 55: 337-341.
19. Whiting PF, Rutjes AW, Westwood ME, Mallett S, Deeks JJ, et al. (2011) QUADAS-2: a revised tool for the quality assessment of diagnostic accuracy studies. *Ann Intern Med* 155: 529-536.
20. Deeks JJ, Macaskill P, Irwig L (2005) The performance of tests of publication bias and other sample size effects in systematic reviews of diagnostic test accuracy was assessed. *J Clin Epidemiol* 58: 882-893.
21. Zamora J, Abaira V, Muriel A, Khan K, Coomarasamy A (2006) Meta-DiSc: a software for meta-analysis of test accuracy data. *BMC Med Res Methodol* 6: 31.
22. Yamamoto S, Uemura N, Okamoto S, Yamaguchi S, Mashiba H, et al. (2000) A new rapid test for detecting anti-*Helicobacter pylori* antibody excreted into urine. *Helicobacter* 5: 160-164.
23. Graham DY, Reddy S (2001) Rapid detection of anti-*Helicobacter pylori* IgG in urine using immunochromatography. *Aliment Pharmacol Ther* 15: 699-702.
24. Fujisawa T, Kaneko T, Kumagai T, Akamatsu T, Katsuyama T, et al. (2001) Evaluation of urinary rapid test for *Helicobacter pylori* in general practice. *J Clin Lab Anal* 15: 154-159.
25. Wu DC, Kuo CH, Lu CY, Su YC, Yu FJ, et al. (2001) Evaluation of an office-based urine test for detecting *Helicobacter pylori*: a Prospective Pilot Study. *Hepatogastroenterology* 48: 614-617.
26. Miwa H, Akamatsu S, Tachikawa T, Sogabe T, Ohtaka K, et al. (2001) On-site diagnosis of H-pylori infection by urine. *Diagnostic Microbiology and Infectious Disease* 39: 95-97.

- 1
- 2
- 3 27. Adachi K, Kawamura A, Ono M, Masuzaki K, Takashima T, et al. (2002) Comparative evaluation of
- 4 urine-based and other minimally invasive methods for the diagnosis of *Helicobacter pylori* infection. *J*
- 5 *Gastroenterol* 37: 703-708.
- 6 28. Wong WM, Wong BC, Xia HH, Tang VS, Lai KC, et al. (2002) An evaluation of a rapid urine test
- 7 for the diagnosis of *Helicobacter pylori* infection in the Chinese population. *Aliment Pharmacol Ther*
- 8 16: 813-817.
- 9 29. Kuo FC, Wang SW, Wu IC, Yu FJ, Yang YC, et al. (2005) Evaluation of urine ELISA test for detecting
- 10 *Helicobacter pylori* infection in Taiwan: a prospective study. *World J Gastroenterol* 11: 5545-5548.
- 11 30. Muhsen K, Athamna A, Athamna M, Spungin-Bialik A, Cohen D (2006) Evaluation of a urine-based
- 12 enzyme-linked immunosorbent assay test for the detection of *Helicobacter pylori* infection among 3- to
- 13 5-year-old Israeli Arab healthy children. *J Pediatr Gastroenterol Nutr* 43: 398-401.
- 14 31. Nguyen LT, Uchida T, Tsukamoto Y, Trinh TD, Ta L, et al. (2010) Evaluation of rapid urine test for the
- 15 detection of *Helicobacter pylori* infection in the Vietnamese population. *Dig Dis Sci* 55: 89-93.
- 16 32. Quach DT, Hiyama T, Shimamoto F, Le QD, Ho LX, et al. (2014) Value of a new stick-type rapid urine test
- 17 for the diagnosis of *Helicobacter pylori* infection in the Vietnamese population. *World Journal of*
- 18 *Gastroenterology* 20: 5087-5091.
- 19 33. Kuo F-C, Wang S-W, Wu IC, Yu F-J, Yang Y-C, et al. (2005) Evaluation of urine ELISA test for detecting
- 20 *Helicobacter pylori* infection in Taiwan: A prospective study. *World Journal of Gastroenterology* 11:
- 21 5545-5548.
- 22 34. Sterne JA, Gavaghan D, Egger M (2000) Publication and related bias in meta-analysis: power of statistical
- 23 tests and prevalence in the literature. *J Clin Epidemiol* 53: 1119-1129.
- 24 35. Malfertheiner P, Megraud F, O'Morain CA, Atherton J, Axon AT, et al. (2012) Management of *Helicobacter*
- 25 *pylori* infection--the Maastricht IV/ Florence Consensus Report. *Gut* 61: 646-664.
- 26 36. Wang YK, Kuo FC, Liu CJ, Wu MC, Shih HY, et al. (2015) Diagnosis of *Helicobacter pylori* infection:
- 27 Current options and developments. *World J Gastroenterol* 21: 11221-11235.
- 28 37. Miftahussurur M, Yamaoka Y (2016) Diagnostic Methods of *Helicobacter pylori* Infection for
- 29 Epidemiological Studies: Critical Importance of Indirect Test Validation. *Biomed Res Int* 2016:
- 30 4819423.
- 31 38. Hamza TH, van Houwelingen HC, Heijnenbroek-Kal MH, Stijnen T (2009) Associating explanatory variables
- 32 with summary receiver operating characteristic curves in diagnostic meta-analysis. *J Clin Epidemiol* 62:
- 33 1284-1291.
- 34 39. Schlattmann P, Verba M, Dewey M, Walther M (2015) Mixture models in diagnostic
- 35 meta-analyses--clustering summary receiver operating characteristic curves accounted for
- 36 heterogeneity and correlation. *J Clin Epidemiol* 68: 61-72.
- 37 40. Chen KF, Chaou CH, Jiang JY, Yu HW, Meng YH, et al. (2016) Diagnostic Accuracy of
- 38 Lipopolysaccharide-Binding Protein as Biomarker for Sepsis in Adult Patients: A Systematic Review
- 39 and Meta-Analysis. *PLoS One* 11: e0153188.
- 40 41. Bucker R, Azevedo-Vethacke M, Groll C, Garten D, Josenhans C, et al. (2012) *Helicobacter pylori*
- 41 colonization critically depends on postprandial gastric conditions. *Sci Rep* 2: 994.
- 42 42. Gong Y, Wei W, Jingwei L, Nannan D, Yuan Y (2015) *Helicobacter pylori* Infection Status Correlates with
- 43 Serum Parameter Levels Responding to Multi-organ Functions. *Dig Dis Sci* 60: 1748-1754.
- 44 43. Whiting P, Rutjes AW, Reitsma JB, Bossuyt PM, Kleijnen J (2003) The development of QUADAS: a tool
- 45 for the quality assessment of studies of diagnostic accuracy included in systematic reviews. *BMC Med*
- 46 *Res Methodol* 3: 25.
- 47 44. Leeflang MM, Deeks JJ, Takwoingi Y, Macaskill P (2013) Cochrane diagnostic test accuracy reviews. *Syst*
- 48 *Rev* 2: 82.
- 49
- 50
- 51
- 52
- 53
- 54
- 55
- 56
- 57
- 58
- 59
- 60

1  
2  
3 **Figure legends**  
4  
5  
6

7 **Figure 1.** Flow diagram of the literature search.  
8  
9

10 **Figure 2.** Forest plots of DOR for *H. pylori* diagnosis by urine IgG antibody. The pooled diagnostic odds  
11 ratio was 73 (95%CI: 46.45–114.74).  
12  
13

14 **Figure 3.** Forest plots of sensitivity, specificity, PLR, and NLR for *H. pylori* diagnosis by urine IgG  
15  
16 (a) The summary sensitivity was 0.83 (95% CI: 0.82–0.85;  $I^2 = 94.4\%$ ). (b) The summary specificity was  
17 0.89 (95% CI: 0.87–0.90;  $I^2 = 86.1\%$ ). (c) The summary PLR was 8.5 (95% CI: 6.27–12.2;  $I^2 = 81.0\%$ ). (d)  
18 The summary NLR of all articles was 0.13 (95% CI: 0.09–0.20;  $I^2 = 96.3\%$ ).  
19  
20  
21  
22  
23  
24  
25  
26  
27  
28  
29  
30  
31  
32  
33  
34  
35  
36  
37  
38  
39  
40  
41  
42  
43  
44  
45  
46  
47  
48  
49  
50  
51  
52  
53  
54  
55  
56  
57  
58  
59  
60

**Table 1.** Characteristics of the studies included in the meta-analysis

| Author                 | Ethnicity    | Year | Region  | No. of cases | Age      | Diseases | Reference standard | Blind design | Assay method | TP(a) | FP(b) | FN(c) | TN(d) |
|------------------------|--------------|------|---------|--------------|----------|----------|--------------------|--------------|--------------|-------|-------|-------|-------|
| Mohammad M             | American     | 1993 | America | 306          | MIX      | Patient  | C,HE,R             | N.A.         | ELISA        | 237   | 6     | 10    | 53    |
| Kiyonori Katsuragi     | Japanese     | 1998 | Asia    | 119          | N.A.     | MIX      | U                  | N.A.         | ELISA        | 69    | 0     | 1     | 49    |
| Hiroto Miwa            | Japanese     | 1999 | Asia    | 132          | Adult    | Patient  | U                  | Yes          | ELISA        | 63    | 5     | 10    | 54    |
| Mototsugu Kato         | Japanese     | 2000 | Asia    | 189          | N.A.     | Patient  | C,H,R              | N.A.         | ELISA        | 127   | 12    | 5     | 45    |
| Soichiro Yamamoto      | Japanese     | 2000 | Asia    | 117          | N.A.     | mix      | H,S                | N.A.         | IM           | 81    | 2     | 7     | 27    |
| D. Y. Graham           | American     | 2001 | America | 104          | Adult    | healthy  | U                  | Yes          | IM           | 41    | 2     | 2     | 59    |
| Toru Fujisawa          | Japanese     | 2001 | Asia    | 21           | Adult    | healthy  | C,H,R              | N.A.         | IM           | 18    | 1     | 0     | 2     |
| Hiroto Miwa            | Japanese     | 2001 | Asia    | 155          | Adult    | Patient  | U                  | N.A.         | IM           | 93    | 7     | 4     | 51    |
| Kyoichi Adachi         | Japanese     | 2002 | Asia    | 100          | MIX      | healthy  | U                  | Yes          | ELISA        | 32    | 2     | 3     | 37    |
|                        |              |      |         |              |          |          |                    |              | IM           | 30    | 1     | 5     | 38    |
| W. M. Wong             | Chinese      | 2002 | Asia    | 123          | Adult    | Patient  | R,H                | Yes          | IM           | 58    | 3     | 2     | 60    |
| Youke Lu               | Chinese      | 2002 | Asia    | 102          | MIX      | Patient  | C,R,H              | N.A.         | ELISA        | 60    | 4     | 2     | 27    |
| A. Leodolter, D. Vaira | European     | 2003 | Europe  | 449          | N.A.     | Patient  | C,H,R              | N.A.         | IM           | 178   | 34    | 38    | 170   |
|                        |              |      |         |              |          |          |                    |              | ELISA        | 193   | 66    | 23    | 140   |
| T Shimizu              | Japanese     | 2003 | Asia    | 68           | Children | Patient  | U, SA              | N.A.         | ELISA        | 12    | 13    | 1     | 42    |
| Antone R. Opekun       | American     | 2004 | America | 188          | Adult    | Patient  | U,S                | Yes          | IM           | 72    | 0     | 8     | 87    |
| Fu-Chen Kuo            | Chinese      | 2005 | Asia    | 317          | MIX      | Patient  | C,R,H,U            | N.A.         | ELISA        | 211   | 8     | 19    | 79    |
| Francis Megraud        | European     | 2005 | Europe  | 316          | Children | Patient  | C,H,R              | Yes          | ELISA        | 86    | 4     | 50    | 176   |
|                        |              |      |         |              |          |          |                    |              | IM           | 36    | 2     | 83    | 151   |
| Yanfang Gong           | Chinese      | 2005 | Asia    | 215          | MIX      | Patient  | U                  | Yes          | ELISA        | 80    | 19    | 16    | 100   |
| Chien-Yu Lu            | Chinese      | 2006 | Asia    | 120          | NA       | Patient  | C,HE,R,U           | Yes          | IM           | 54    | 6     | 8     | 52    |
| Khitam Muhsen          | Israeli Arab | 2006 | Asia    | 159          | Children | healthy  | SA                 | N.A.         | ELISA        | 27    | 3     | 52    | 77    |
| Lam Tung Nguyen        | Vietnamese   | 2010 | Asia    | 148          | MIX      | Patient  | C,IM,S             | Yes          | IM           | 66    | 6     | 17    | 59    |
| Demray Gürbüz E        | Turks        | 2012 | Asia    | 124          | Adult    | Patient  | C,H,R              | Yes          | IM           | 61    | 8     | 21    | 34    |
|                        |              |      |         |              |          |          |                    |              | ELISA        | 61    | 8     | 21    | 34    |
| Masumi Okuda           | Japanese     | 2013 | Asia    | 101          | Children | healthy  | U, SA              | Yes          | ELISA        | 34    | 2     | 3     | 62    |
|                        |              |      |         |              |          |          |                    |              | IM           | 29    | 0     | 7     | 64    |
| Duc T Quach            | Vietnamese   | 2014 | Asia    | 200          | Adult    | Patient  | R,H                | N.A.         | IM           | 94    | 9     | 17    | 80    |

C: culture, HE: hematoxylin and eosin, H: histology, R: rapid urease test, U: urea breath test, SA: stool, IM: immunochromatographic technique, S: serology.

**Table 2.** Summary of QUADAS-2 assessments of included studies

| Author                 | 1 | 2 | 3 | 4 | 5 | 6 | 7 | 8 | 9 | 10 | 11 | 12 | 13 | 14 | Quantity |
|------------------------|---|---|---|---|---|---|---|---|---|----|----|----|----|----|----------|
| Mohammad M             | N | Y | Y | Y | U | Y | N | Y | U | N  | U  | Y  | Y  | Y  | 8        |
| Kiyonri Katsuragi      | N | Y | Y | Y | U | Y | N | Y | U | N  | U  | Y  | Y  | Y  | 8        |
| Hiroto Miwa            | N | Y | Y | Y | Y | Y | N | Y | Y | N  | Y  | Y  | Y  | Y  | 11       |
| Mototsugu Kato         | U | Y | Y | Y | U | Y | N | Y | U | N  | U  | Y  | Y  | Y  | 8        |
| Soichiro Yamamoto      | U | Y | Y | Y | U | Y | N | Y | U | N  | Y  | Y  | Y  | Y  | 8        |
| D. Y. Graham           | N | Y | Y | Y | Y | Y | N | Y | Y | N  | U  | Y  | Y  | Y  | 10       |
| Toru Fujisawa          | U | Y | Y | Y | U | Y | N | Y | U | N  | U  | Y  | Y  | Y  | 8        |
| Hiroto Miwa            | Y | Y | Y | Y | U | Y | N | Y | U | N  | Y  | Y  | Y  | Y  | 10       |
| Kyoichi Adachi         | N | Y | Y | Y | Y | Y | N | Y | Y | N  | Y  | Y  | Y  | Y  | 11       |
| W. M. WONG             | U | Y | Y | Y | Y | Y | N | Y | Y | N  | U  | Y  | Y  | Y  | 10       |
| Youke Lu               | Y | Y | Y | Y | U | Y | N | Y | U | N  | Y  | Y  | Y  | Y  | 10       |
| A. LEODOLTER, D. VAIRA | N | Y | Y | Y | U | Y | N | Y | U | N  | U  | Y  | Y  | Y  | 8        |
| T Shimizu              | N | Y | Y | Y | U | Y | N | Y | U | N  | Y  | Y  | Y  | Y  | 9        |
| Antone R. Opekun       | Y | Y | Y | Y | U | Y | Y | Y | Y | Y  | Y  | Y  | Y  | Y  | 13       |
| Fu-Chen Kuo            | N | Y | Y | Y | U | Y | N | Y | U | N  | Y  | Y  | Y  | Y  | 9        |
| Francis Megraud        | U | Y | Y | Y | Y | Y | N | Y | Y | N  | Y  | Y  | Y  | Y  | 11       |
| Chien-Yu Lu            | N | Y | Y | Y | Y | Y | N | Y | Y | N  | Y  | Y  | Y  | Y  | 11       |
| Yanfang Gong           | U | Y | N | Y | Y | Y | N | Y | Y | N  | U  | Y  | Y  | Y  | 9        |
| Khitam Muhsen          | N | Y | N | Y | U | Y | N | Y | U | N  | U  | Y  | Y  | Y  | 7        |
| Lam Tung Nguyen        | N | Y | Y | Y | Y | Y | N | Y | Y | N  | U  | Y  | Y  | Y  | 8        |
| Demiray Gürbüz E       | N | Y | Y | Y | U | Y | N | Y | Y | N  | U  | Y  | Y  | Y  | 8        |
| Masumi Okuda           | N | Y | Y | Y | Y | Y | N | Y | Y | N  | Y  | Y  | Y  | Y  | 9        |
| Duc T Quach            | U | Y | Y | Y | U | Y | N | Y | U | N  | U  | Y  | Y  | Y  | 8        |

Y: Yes, N: No, U: Unclear.

1. Was a consecutive or random sample of patients enrolled?
2. Was a case-control design avoided?
3. Did the study avoid inappropriate exclusions?
4. Are there concerns that the included patients and setting do not match the review question?
5. Were the index test results interpreted without knowledge of the results of the reference standard?
6. If a threshold was used, was it prespecified?
7. Are there concerns that the index test, its conduct, or its interpretation differ from the review question?
8. Is the reference standard likely to correctly classify the target condition?
9. Were the reference standard results interpreted without knowledge of the results of the index test?
10. Are there concerns that the target condition as defined by the reference standard does not match the question?
11. Was there an appropriate interval between the index test and reference standard?
12. Did all patients receive the same reference standard?
13. Were all patients included in the analysis?
14. Could the patient flow have introduced bias?

**Table 3.** Group/subgroup analysis of pooled estimates with 95 % confidence interval for sensitivity, specificity, and positive and negative likelihood ratios

| Group/Subgroup     | Spearman<br>P | Cochrane Q test      |        | Pooled Sensitivity<br>( 95%CI ) | Pooled Specificity<br>( 95%CI ) | Pooled Positive LR<br>( 95%CI ) | Pooled Negative NR<br>( 95%CI ) | AUC  | <i>P</i> ( <i>AUC</i> ) |
|--------------------|---------------|----------------------|--------|---------------------------------|---------------------------------|---------------------------------|---------------------------------|------|-------------------------|
|                    |               | DOR ( 95%CI )        | P      |                                 |                                 |                                 |                                 |      |                         |
| Overall            | 0.413         | 73(46.45-114.74)     | 0.0000 | 0.83(0.82-0.85)                 | 0.89(0.88-0.90)                 | 8.81(6.37-12.2)                 | 0.13(0.09-0.2)                  | 0.96 |                         |
| Age                |               |                      |        |                                 |                                 |                                 |                                 |      |                         |
| Children           | 0.397         | 61.62(22.16-171.32)  | 0.0335 | 0.53(0.48-0.58)                 | 0.96(0.94-0.97)                 | 17.93(4.83-62.59)               | 0.35(0.22-0.58)                 | 0.96 | >0.05                   |
| Adult              | 0.732         | 85.12(29.81-243.06)  | 0.0000 | 0.87(0.84-0.89)                 | 0.91(0.88-0.94)                 | 8.13(4.61-14.33)                | 0.13(0.07-0.22)                 | 0.96 |                         |
| Region             |               |                      |        |                                 |                                 |                                 |                                 |      |                         |
| Asian              | 0.724         | 73.75(43.38-125.38)  | 0.0000 | 0.86 ( 0.84-0.88 )              | 0.9(0.88-0.92)                  | 7.74(5.77-10.39)                | 0.12(0.07-0.20)                 | 0.96 | >0.05                   |
| Europe and America | 0.645         | 73.75(29.26-125.38)  | 0.0000 | 0.80 ( 0.77-0.82 )              | 0.88(0.86-0.90)                 | 12.05(5.22-27.8)                | 0.16(0.07-0.38)                 | 0.96 |                         |
| Study population   |               |                      |        |                                 |                                 |                                 |                                 |      |                         |
| Patient            | 0.616         | 54.29(34.07-86.51)   | 0.0000 | 0.84(0.82-0.85)                 | 0.87(0.85-0.89)                 | 7.17(5.18-9.93)                 | 0.14 ( 0.09-0.23 )              | 0.94 | <0.05                   |
| Healthy            | 0.294         | 156.11(41.44-588.04) | 0.0073 | 0.75 ( 0.69-0.80 )              | 0.97(0.94-0.98)                 | 16.25(6.94-38.06)               | 0.13 ( 0.03-0.53 )              | 0.98 |                         |
| Assay method       |               |                      |        |                                 |                                 |                                 |                                 |      |                         |
| IM                 | 0.5940        | 82.94(41.62-165.29)  | 0.0000 | 0.81(0.78-0.83)                 | 0.92(0.90-0.94)                 | 9.81 ( 6.28-15.34 )             | 0.14 ( 0.07-0.28 )              | 0.96 | >0.05                   |
| ELISA              | 0.7820        | 67.46(35.58-127.9)   | 0.0000 | 0.86(0.84-0.87)                 | 0.87(0.84-0.88)                 | 7.92(5.02-12.5)                 | 0.12 ( 0.07-0.23 )              | 0.95 |                         |



**Table 4.** Meta-regression of potential heterogeneity within the included studies

| Variables        | Coeff. | Std. Err. | P-value | RDOR | [95%CI]      |
|------------------|--------|-----------|---------|------|--------------|
| Cte.             | -0.98  | 3.4737    | 0.781   | ---- | ----         |
| S                | 0.309  | 0.1614    | 0.0706  | ---- | ----         |
| Region           | -0.459 | 0.8022    | 0.574   | 0.63 | (0.12;3.39)  |
| Sample size      | -0.001 | 0.0041    | 0.8856  | 1    | (0.99;1.01)  |
| Age              | -0.093 | 0.2489    | 0.7117  | 0.91 | (0.54;1.53)  |
| Study population | 1.367  | 0.5326    | 0.0189  | 3.92 | (1.29;11.96) |
| blinded design   | 0.144  | 0.6537    | 0.8282  | 1.15 | (0.29;4.54)  |
| Assay method     | 0.008  | 0.4155    | 0.9841  | 1.01 | (0.42;2.41)  |
| quanlity         | 0.518  | 0.22      | 0.0295  | 1.68 | (1.06;2.66)  |

Cte: Constant coefficient, S: Statistic, Coeff: Constant coefficient, Std. Err: Standard error, RDOR: Relative diagnostic odd ratio.

or peer review only

1  
2  
3  
4  
5  
6  
7  
8  
9  
10  
11  
12  
13  
14  
15  
16  
17  
18  
19  
20  
21  
22  
23  
24  
25  
26  
27  
28  
29  
30  
31  
32  
33  
34  
35  
36  
37  
38  
39  
40  
41  
42  
43  
44  
45  
46  
47  
48  
49  
50  
51  
52  
53  
54  
55  
56  
57  
58  
59  
60

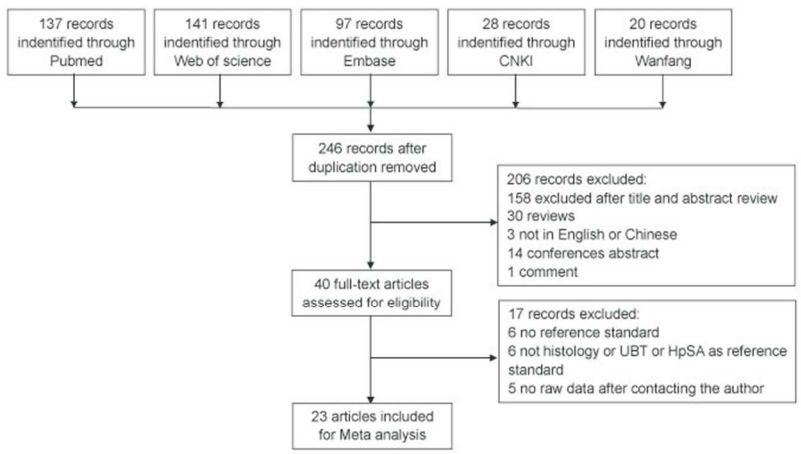

Figure 1. Flow diagram of the literature search.

71x50mm (300 x 300 DPI)

Review only

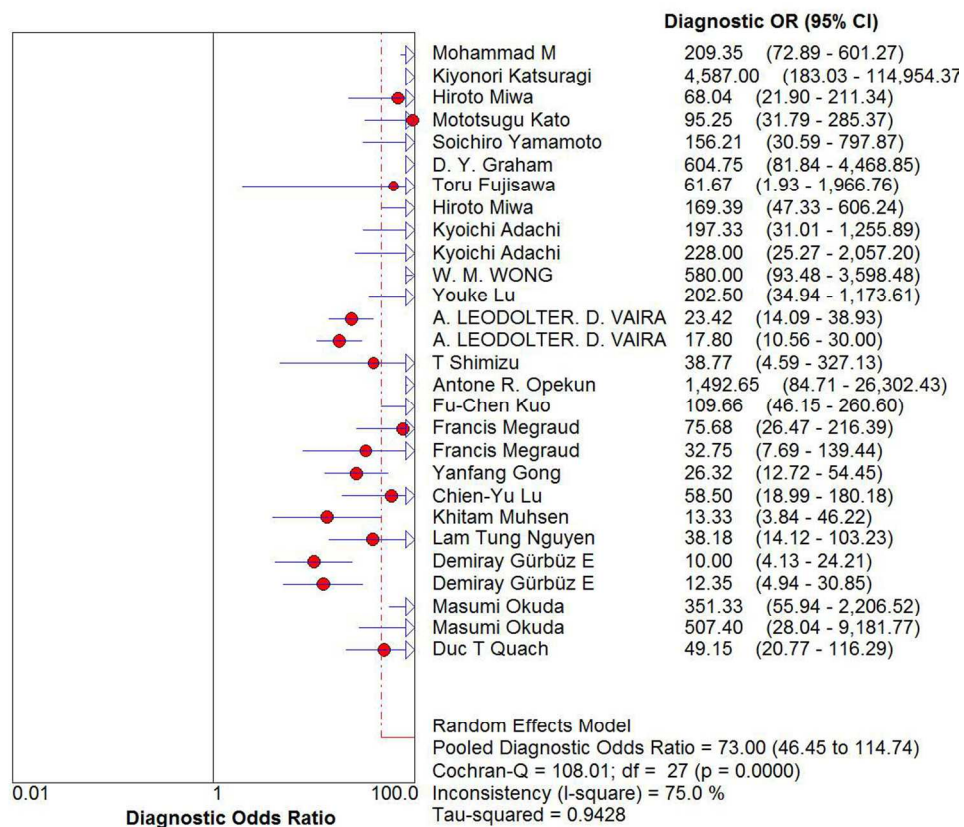

Figure 2. Forest plots of DOR for H. pylori diagnosis by urine IgG antibody. The pooled diagnostic odds ratio was 73 (95%CI: 46.45–114.74).

103x88mm (300 x 300 DPI)

Only

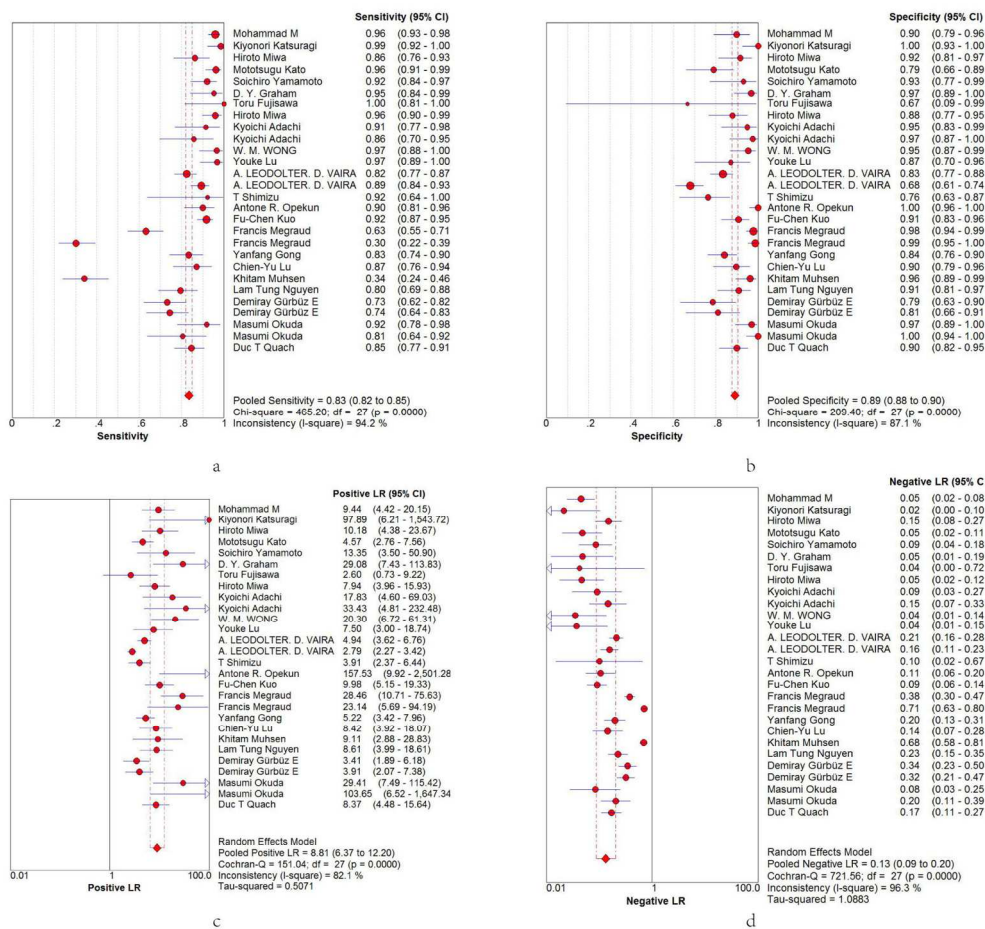

Figure 3. Forest plots of sensitivity, specificity, PLR, and NLR for *H. pylori* diagnosis by urine IgG antibody. (a) The summary sensitivity was 0.83 (95% CI: 0.82–0.85; I<sup>2</sup> = 94.4%). (b) The summary specificity was 0.89 (95% CI: 0.87–0.90; I<sup>2</sup> = 86.1%). (c) The summary PLR was 8.5 (95% CI: 6.27–12.2; I<sup>2</sup> = 81.0%). (d) The summary NLR of all articles was 0.13 (95% CI: 0.09–0.20; I<sup>2</sup> = 96.3%).

150x140mm (300 x 300 DPI)

1  
2  
3 **Accuracy of testing for anti-*Helicobacter pylori* IgG<sup>1</sup> in urine for *H. pylori***  
4  
5 **infection diagnosis: systematic review and meta-analysis**  
6

7 Yuehua Gong, Li Qiuping, Yuan Yuan\*

8  
9  
10 *Department of Tumor Etiology and Screening, Cancer Institute and General Surgery, The First Affiliated*  
11 *Hospital of China Medical University and Key Laboratory of Cancer Etiology and Prevention, Liaoning*  
12 *Provincial Education Department, Shenyang 110001, China*  
13

14  
15 \*Correspondence should be addressed to Yuan Yuan; [yuan yuan@cmu.edu.cn](mailto:yuan yuan@cmu.edu.cn)  
16  
17  
18  
19  
20

21 **Supplemental Figure legends**  
22  
23  
24

25 **Fig 1. Detail of search strategy as performed in Pubmed.**  
26  
27

28  
29 **Fig 2. Summary of QUADAS-2 assessments of included studies.**  
30  
31

32 **Fig 3. Summary receiver operating characteristic (SROC) curves and confidence interval**  
33 **for the diagnosis of *H.pylori* infection using IgG antibody in urine.**  
34  
35

36  
37  
38 **Fig 4. Deek's funnel plot to assess the likelihood of publication bias.** The statistically non-  
39 significant P-value of 0.124 for the slope coefficient suggests symmetry in the data and a low  
40 likelihood of publication bias  
41  
42  
43  
44  
45  
46  
47  
48  
49  
50  
51  
52  
53  
54  
55  
56  
57  
58  
59  
60

1  
2  
3  
4  
5  
6  
7 #1 H.pylori

8 Search details:

9 "helicobacter pylori"[MeSH Terms] OR ("helicobacter"[All Fields] AND "pylori"[All Fields]) OR

10 "helicobacter pylori"[All Fields] OR "h pylori"[All Fields]

11 #2 Helicobacter pylori

12 #3 #1 OR #2

13 #4 urine IgG antibody

14 Search details:

15 ("urine"[Subheading] OR "urine"[All Fields] OR "urine"[MeSH Terms]) AND IgG[All Fields] AND

16 ("immunoglobulins"[MeSH Terms] OR "immunoglobulins"[All Fields] OR "antibody"[All Fields] OR

17 "antibodies"[MeSH Terms] OR "antibodies"[All Fields])

18 #5 urine antibody

19 #6 #4 OR #5

20 #7 #3 AND #6

21  
22  
23  
24  
25 Fig 1. Detail of search strategy as performed in Pubmed.

26  
27 144x76mm (300 x 300 DPI)

28  
29  
30  
31  
32  
33  
34  
35  
36  
37  
38  
39  
40  
41  
42  
43  
44  
45  
46  
47  
48  
49  
50  
51  
52  
53  
54  
55  
56  
57  
58  
59  
60  
review only

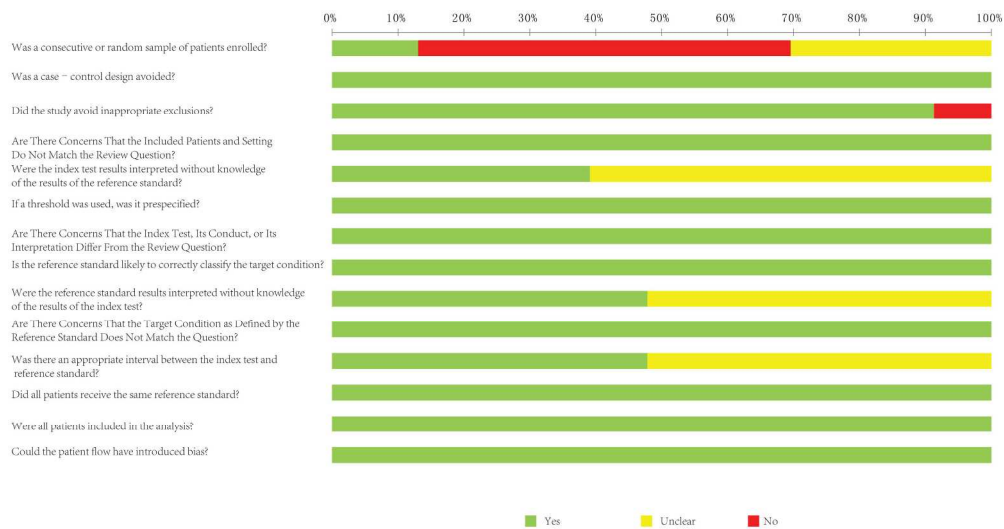

Fig 2. Summary of QUADAS-2 assessments of included studies.

216x112mm (300 x 300 DPI)

review only

1  
2  
3  
4  
5  
6  
7  
8  
9  
10  
11  
12  
13  
14  
15  
16  
17  
18  
19  
20  
21  
22  
23  
24  
25  
26  
27  
28  
29  
30  
31  
32  
33  
34  
35  
36  
37  
38  
39  
40  
41  
42  
43  
44  
45  
46  
47  
48  
49  
50  
51  
52  
53  
54  
55  
56  
57  
58  
59  
60

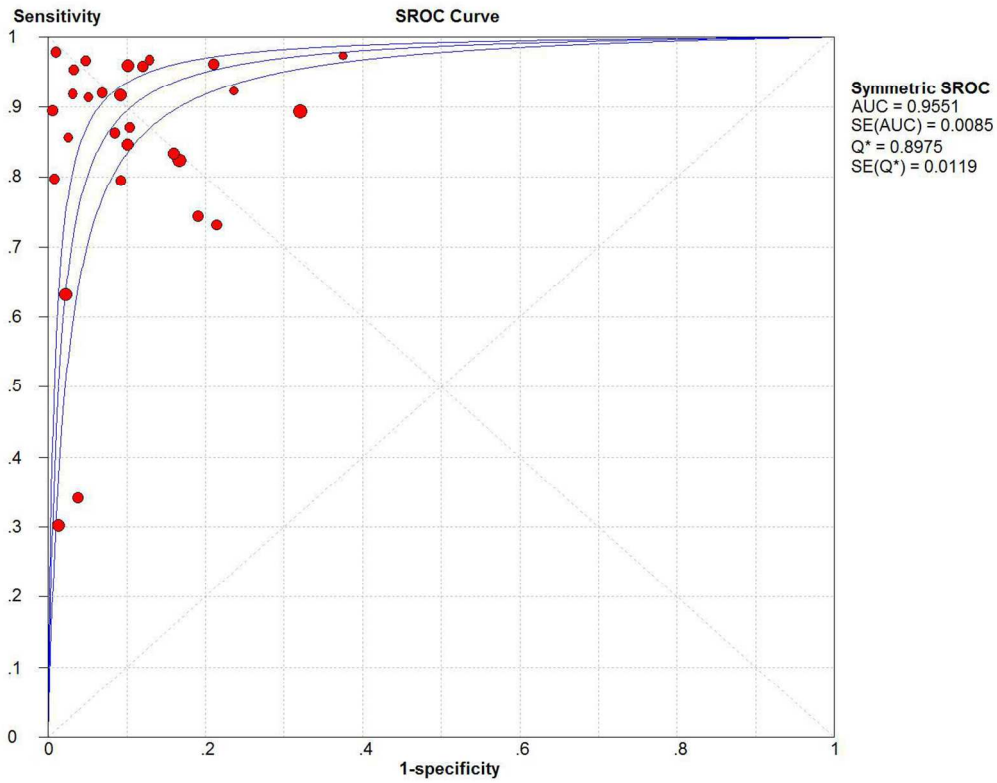

Fig 3. Summary receiver operating characteristic (SROC) curves and confidence interval for the diagnosis of H.pylori infection using IgG antibody in urine.

113x90mm (300 x 300 DPI)



1  
2  
3  
4  
5  
6  
7  
8  
9  
10  
11  
12  
13  
14  
15  
16  
17  
18  
19  
20  
21  
22  
23  
24  
25  
26  
27  
28  
29  
30  
31  
32  
33  
34  
35  
36  
37  
38  
39  
40  
41  
42  
43  
44  
45  
46  
47  
48  
49  
50  
51  
52  
53  
54  
55  
56  
57  
58  
59  
60

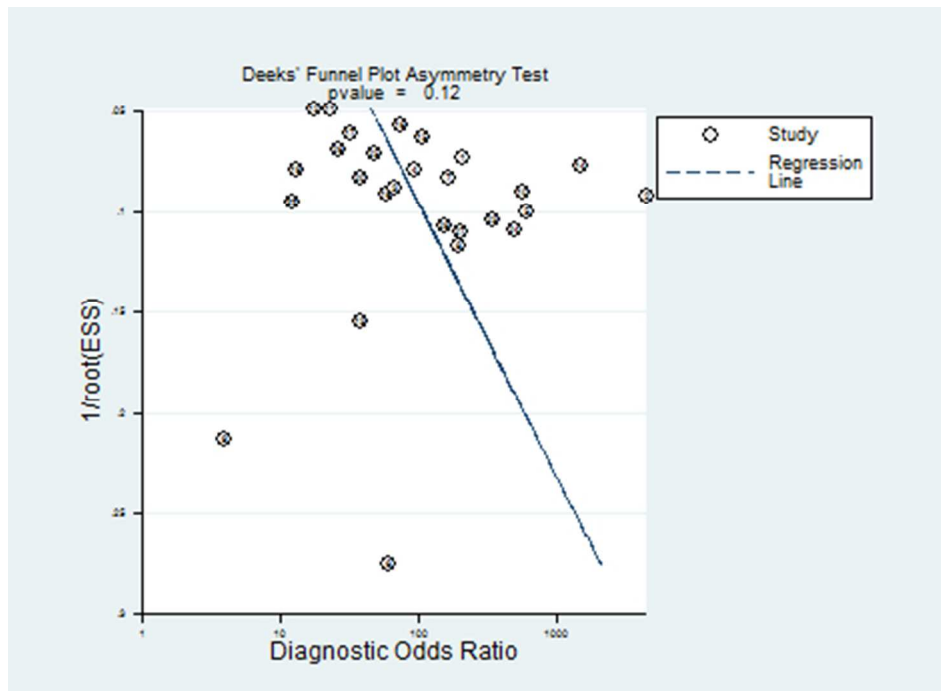

Fig 4. Deek's funnel plot to assess the likelihood of publication bias. The statistically non- significant P-value of 0.124 for the slope coefficient suggests symmetry in the data and a low likelihood of publication bias

39x29mm (300 x 300 DPI)

ew only



# PRISMA 2009 Checklist

1  
2  
3  
4  
5  
6  
7  
8  
9  
10  
11  
12  
13  
14  
15  
16  
17  
18  
19  
20  
21  
22  
23  
24  
25  
26  
27  
28  
29  
30  
31  
32  
33  
34  
35  
36  
37  
38  
39  
40  
41  
42  
43  
44  
45  
46  
47  
48  
49

| Section/topic                      | #  | Checklist item                                                                                                                                                                                                                                                                                              | Reported on page # |
|------------------------------------|----|-------------------------------------------------------------------------------------------------------------------------------------------------------------------------------------------------------------------------------------------------------------------------------------------------------------|--------------------|
| <b>TITLE</b>                       |    |                                                                                                                                                                                                                                                                                                             |                    |
| Title                              | 1  | Identify the report as a systematic review, meta-analysis, or both.                                                                                                                                                                                                                                         | 1                  |
| <b>ABSTRACT</b>                    |    |                                                                                                                                                                                                                                                                                                             |                    |
| Structured summary                 | 2  | Provide a structured summary including, as applicable: background; objectives; data sources; study eligibility criteria, participants, and interventions; study appraisal and synthesis methods; results; limitations; conclusions and implications of key findings; systematic review registration number. | 1                  |
| <b>INTRODUCTION</b>                |    |                                                                                                                                                                                                                                                                                                             |                    |
| Rationale                          | 3  | Describe the rationale for the review in the context of what is already known.                                                                                                                                                                                                                              | 3                  |
| Objectives                         | 4  | Provide an explicit statement of questions being addressed with reference to participants, interventions, comparisons, outcomes, and study design (PICOS).                                                                                                                                                  | 3,4                |
| <b>METHODS</b>                     |    |                                                                                                                                                                                                                                                                                                             |                    |
| Protocol and registration          | 5  | Indicate if a review protocol exists, if and where it can be accessed (e.g., Web address), and, if available, provide registration information including registration number.                                                                                                                               |                    |
| Eligibility criteria               | 6  | Specify study characteristics (e.g., PICOS, length of follow-up) and report characteristics (e.g., years considered, language, publication status) used as criteria for eligibility, giving rationale.                                                                                                      | 4                  |
| Information sources                | 7  | Describe all information sources (e.g., databases with dates of coverage, contact with study authors to identify additional studies) in the search and date last searched.                                                                                                                                  | 4,5                |
| Search                             | 8  | Present full electronic search strategy for at least one database, including any limits used, such that it could be repeated.                                                                                                                                                                               | 4                  |
| Study selection                    | 9  | State the process for selecting studies (i.e., screening, eligibility, included in systematic review, and, if applicable, included in the meta-analysis).                                                                                                                                                   | 4                  |
| Data collection process            | 10 | Describe method of data extraction from reports (e.g., piloted forms, independently, in duplicate) and any processes for obtaining and confirming data from investigators.                                                                                                                                  | 4,5                |
| Data items                         | 11 | List and define all variables for which data were sought (e.g., PICOS, funding sources) and any assumptions and simplifications made.                                                                                                                                                                       | 4,5                |
| Risk of bias in individual studies | 12 | Describe methods used for assessing risk of bias of individual studies (including specification of whether this was done at the study or outcome level), and how this information is to be used in any data synthesis.                                                                                      | 5                  |
| Summary measures                   | 13 | State the principal summary measures (e.g., risk ratio, difference in means).                                                                                                                                                                                                                               | 5                  |
| Synthesis of results               | 14 | Describe the methods of handling data and combining results of studies, if done, including measures of consistency (e.g., $I^2$ for each meta-analysis).                                                                                                                                                    | 5                  |



# PRISMA 2009 Checklist

Page 1 of 2

| Section/topic                 | #  | Checklist item                                                                                                                                                                                           | Reported on page # |
|-------------------------------|----|----------------------------------------------------------------------------------------------------------------------------------------------------------------------------------------------------------|--------------------|
| Risk of bias across studies   | 15 | Specify any assessment of risk of bias that may affect the cumulative evidence (e.g., publication bias, selective reporting within studies).                                                             | 5                  |
| Additional analyses           | 16 | Describe methods of additional analyses (e.g., sensitivity or subgroup analyses, meta-regression), if done, indicating which were pre-specified.                                                         | 5                  |
| <b>RESULTS</b>                |    |                                                                                                                                                                                                          |                    |
| Study selection               | 17 | Give numbers of studies screened, assessed for eligibility, and included in the review, with reasons for exclusions at each stage, ideally with a flow diagram.                                          | 6                  |
| Study characteristics         | 18 | For each study, present characteristics for which data were extracted (e.g., study size, PICOS, follow-up period) and provide the citations.                                                             | 6                  |
| Risk of bias within studies   | 19 | Present data on risk of bias of each study and, if available, any outcome level assessment (see item 12).                                                                                                |                    |
| Results of individual studies | 20 | For all outcomes considered (benefits or harms), present, for each study: (a) simple summary data for each intervention group (b) effect estimates and confidence intervals, ideally with a forest plot. | 6-8                |
| Synthesis of results          | 21 | Present results of each meta-analysis done, including confidence intervals and measures of consistency.                                                                                                  | 6-8                |
| Risk of bias across studies   | 22 | Present results of any assessment of risk of bias across studies (see Item 15).                                                                                                                          | 9                  |
| Additional analysis           | 23 | Give results of additional analyses, if done (e.g., sensitivity or subgroup analyses, meta-regression [see Item 16]).                                                                                    | 7-8                |
| <b>DISCUSSION</b>             |    |                                                                                                                                                                                                          |                    |
| Summary of evidence           | 24 | Summarize the main findings including the strength of evidence for each main outcome; consider their relevance to key groups (e.g., healthcare providers, users, and policy makers).                     | 9-10               |
| Limitations                   | 25 | Discuss limitations at study and outcome level (e.g., risk of bias), and at review-level (e.g., incomplete retrieval of identified research, reporting bias).                                            | 11                 |
| Conclusions                   | 26 | Provide a general interpretation of the results in the context of other evidence, and implications for future research.                                                                                  | 11                 |
| <b>FUNDING</b>                |    |                                                                                                                                                                                                          |                    |
| Funding                       | 27 | Describe sources of funding for the systematic review and other support (e.g., supply of data); role of funders for the systematic review.                                                               | 11                 |

From: Moher D, Liberati A, Tetzlaff J, Altman DG, The PRISMA Group (2009). Preferred Reporting Items for Systematic Reviews and Meta-Analyses: The PRISMA Statement. PLoS Med 6(6): e1000097. doi:10.1371/journal.pmed1000097

For more information, visit: [www.prisma-statement.org](http://www.prisma-statement.org).

Page 2 of 2

For peer review only - <http://bmjopen.bmj.com/site/about/guidelines.xhtml>

# BMJ Open

## Accuracy of testing for anti-Helicobacter pylori IgG in urine for H. pylori infection diagnosis: a systematic review and meta-analysis

|                                 |                                                                                                                                                                                                                                                                                                                                                                                                                                        |
|---------------------------------|----------------------------------------------------------------------------------------------------------------------------------------------------------------------------------------------------------------------------------------------------------------------------------------------------------------------------------------------------------------------------------------------------------------------------------------|
| Journal:                        | <i>BMJ Open</i>                                                                                                                                                                                                                                                                                                                                                                                                                        |
| Manuscript ID                   | bmjopen-2016-013248.R2                                                                                                                                                                                                                                                                                                                                                                                                                 |
| Article Type:                   | Research                                                                                                                                                                                                                                                                                                                                                                                                                               |
| Date Submitted by the Author:   | 22-Feb-2017                                                                                                                                                                                                                                                                                                                                                                                                                            |
| Complete List of Authors:       | Gong, Yuehua; Cancer Institute and General Surgery, The First Affiliated Hospital of China Medical University , Department of Tumor Etiology and Screening<br>Li, Qiuping; Cancer Institute and General Surgery, The First Affiliated Hospital of China Medical University , Department of Tumor Etiology and Screening<br>Yuan, Yuan; Cancer Institute and General Surgery, The First Affiliated Hospital of China Medical University |
| <b>Primary Subject Heading</b>: | Gastroenterology and hepatology                                                                                                                                                                                                                                                                                                                                                                                                        |
| Secondary Subject Heading:      | Infectious diseases, Gastroenterology and hepatology                                                                                                                                                                                                                                                                                                                                                                                   |
| Keywords:                       | H.pylori, urine IgG antibody, diagnosis, Meta analysis                                                                                                                                                                                                                                                                                                                                                                                 |
|                                 |                                                                                                                                                                                                                                                                                                                                                                                                                                        |

SCHOLARONE™  
Manuscripts

1  
2  
3 **Accuracy of testing for anti-*Helicobacter pylori* IgG in urine for *H. pylori* infection**  
4  
5 **diagnosis: a systematic review and meta-analysis**  
6

7 Yuehua Gong, Li Qiuping, Yuan Yuan\*

8  
9 *Department of Tumor Etiology and Screening, Cancer Institute and General Surgery, The First Affiliated Hospital of China*  
10 *Medical University and Key Laboratory of Cancer Etiology and Prevention, Liaoning Provincial Education Department,*  
11 *Shenyang 110001, China*  
12

13  
14 \*Correspondence should be addressed to Yuan Yuan; yuanyuan@cmu.edu.cn  
15

16  
17 **Abstract**  
18

19 **Objectives:** This meta-analysis aims to systematically measure the potential diagnostic value  
20 of anti-*H. pylori* IgG in urine for infection diagnosis, using all eligible studies published in  
21 English and Chinese language.  
22

23 **Design:** The random effect model was used to analyze the pooled sensitivity, specificity,  
24 positive likelihood ratio (PLR), negative LR (NLR), diagnostic odds ratio (DOR), together with  
25 the summary receiver operator characteristic (SROC) curve.  
26

27 **Setting:** Literature searches of databases including PubMed, EMBASE, MEDLINE, Web of  
28 Science, Chinese National Knowledge Infrastructure (CNKI) and Wanfang Databases were  
29 performed to retrieve studies evaluating the diagnostic value of urine IgG antibody for  
30 *H.pylori* infection.  
31

32 **Primary outcome measure:** Twenty-three studies with 4,963 subjects were included in the  
33 current meta-analysis.  
34

35 **Results:** The pooled sensitivity, specificity, PLR, NLR, DOR, and AUC were 0.83 (95% CI,  
36 0.82-0.85), 0.89 (95% CI, 0.88-0.90), 8.81 (95% CI, 6.37-12.2), 0.13 (95% CI, 0.09-0.2), 73 (95%  
37 CI, 46.45-114.74), and 0.9551, respectively. Subgroup analyses showed that diagnostic  
38 accuracy of the urine IgG assay was no different in age, region, study population and assay  
39 method.  
40

41 **Conclusions:** Anti-*H.pylori* antibody in urine might serve as a good marker in diagnosing  
42 *H.pylori* infection. However, further validation based on a larger sample is still required.  
43  
44  
45  
46  
47  
48  
49  
50  
51  
52  
53  
54  
55  
56  
57  
58  
59  
60

### Strengths and limitations of this study

1. A comprehensive search of literature databases was performed to identify all eligible studies that reported the diagnostic performance of an anti-*Helicobacter pylori* antibody in urine.
2. The systematic meta-analysis used a standard protocol, strict inclusion criteria, standardized data extraction, and independent reviewers.
3. We first assessed the summary predictive value of anti-*H. pylori* IgG in urine for infection diagnosis, and additional subgroup analyses based on study population, region, age, and assay method were used to explore heterogeneity.
4. Unpublished research such as conference papers and studies published in languages other than English or Chinese were not included in this meta-analysis, so some relevant research may have been missed.
5. We selected the cut-off value according to the manufacturer's recommendations, but this may not have been the most appropriate for specific areas.

## Introduction

Helicobacter pylori (*H. pylori*) is a bacterium that chronically infects more than half of the world's population and plays a causative role in the pathogenesis of chronic gastritis, peptic ulcer diseases, gastric cancer, and mucosa-associated lymphoid tissue lymphoma [1-4]. The considerable burden of these *H. pylori*-related outcomes means that there is an acute demand for accurate diagnosis of this infection. Several detection methods have already been developed, such as culture, histological staining, the urea breath test (UBT), and the *H. pylori* stool antigen test (HpSA), but a simple, non-invasive, inexpensive, and accurate diagnostic test remains the goal.

A number of methods have been developed for non-invasive *H. pylori* infection diagnosis using body fluids. Tests for the detection of serum anti-*H. pylori* antibodies are widely used because they are relatively straightforward, convenient, and economical. Several studies have also reported the presence of specific anti-*H. pylori* antibodies in body fluids other than serum [5,6]. For example, anti-*H. pylori* immunoglobulin (Ig)G is detectable in urine and has been used for the diagnosis of *H. pylori* infection. If urine samples could be used for the sensitive screening of *H. pylori* infection, this would be more convenient both for clinical practice and mass screening.

In 1993, Alemohammad *et al.* reported that the enzyme-linked immunosorbent assay (ELISA) was both highly sensitive and specific for the detection of anti-*H. pylori* antibodies in urine. This was confirmed by another study from Japan [7]. These studies laid the groundwork for the development of a urine-based ELISA kit and a rapid immunochromatography (IM) assay for *H. pylori* diagnosis [8]. Evaluation of the IM assay in Japanese asymptomatic adults and patients with gastric disorders showed promising results compared with UBT (sensitivity: 86.3%–99%; specificity: 91.5%–100%) [8,9]. The use of ELISA to detect *H. pylori* in Japanese children also revealed high levels of sensitivity and specificity. When compared with <sup>13</sup>C-UBT and/or HpSA, the ELISA sensitivity ranged from 92.3%–94.4%, and specificity from 76.4%–96.9% [10,11]. Different findings were recorded, however, for the same kit when compared with gastrointestinal endoscopic testing for *H. pylori*, in line with European multicentre studies. Sensitivity and specificity in adults were 89.4% and 68%, respectively [12], and the corresponding figures in children were 63.2% and 97.3%, respectively [13]. Subsequently, the accuracy and usefulness of the IM assay have been supported by several trials in different geographic areas, including Japan [14], Turkey [15], Hong Kong and Taiwan [16], the United States [17], and Europe [18].

These variations in the sensitivity and specificity of anti-*H. pylori* IgG urine testing

1  
2  
3 indicate the need for a comprehensive evaluation of the test performance before wider  
4 application. Therefore, this systematic review and meta-analysis was conducted to identify  
5 whether anti-*H. pylori* IgG in urine can serve as a valuable test for *H. pylori* diagnosis.  
6  
7

## 8 9 10 **Methods**

### 11 ***Literature search strategy***

12  
13 Literatures of electronic databases including PubMed, EMBASE, MEDLINE, Web of  
14 Science, Chinese National Knowledge Infrastructure (CNKI) and Wanfang Databases were  
15 searched by two independent researchers to identify relevant studies that evaluate the  
16 diagnostic value of urine IgG antibody for *H.pylori* infection. The last search date was  
17 January 7, 2016. The following search terms (in Title, Abstract or keywords fields) were  
18 combined using Boolean rules: '*H.pylori*', '*Helicobacter pylori*', 'urine IgG antibody',  
19 'urine antibody' (Supplemental Figure 1) , with a filter for human studies published in  
20 English or Chinese. Two researchers (Yuehua Gong and Qiuping Li) screened all the titles  
21 and abstracts; studies including data on *H. pylori* and urine IgG levels were read in full text.  
22 The reference lists of the selected papers were hand-searched to identify additional available  
23 papers. When multiple publications presented results using the same patient cohort, the most  
24 recent or the most complete publication was selected for inclusion. Review articles and  
25 references of the accepted articles were searched for additional papers.  
26  
27  
28  
29  
30  
31  
32  
33  
34  
35

### 36 ***Literature selection criteria***

37  
38 We included studies that met the following criteria: (1) Anti-*H.pylori* IgG antibody in  
39 urine was detected; (2) Investigation of the diagnostic accuracy of urine IgG of *H.pylori*  
40 compared to culture or histopathology or UBT or HpSA (based on only one or at least two  
41 reference methods); (3) Sensitivity, specificity, and cut-off values can be found in identified  
42 studies or calculated from the provided data; (4) Publication with full text in a peer-reviewed  
43 scientific journal. While the exclusion criteria were listed as follows: (1) studies with  
44 insufficient data to construct the 2\*2 table; (2) Reviews, letters, and conference abstracts; and  
45 (3) publications identified as duplicates. If a study fulfilled the eligibility criteria, it was  
46 included in the systematic review. Any discrepancies were resolved with discussion.  
47  
48  
49  
50  
51  
52  
53  
54

### 55 **Data extraction and Quality Assessment of Diagnostic Accuracy Studies (QUADAS)-2** 56 **assessment** 57 58 59 60



1  
2  
3 The following variables were extracted from the original studies in a predefined data  
4 extraction form (see Table 1): author, ethnicity, year of publication, number of cases, age  
5 (adults or children), study population (patients or healthy), reference standard, and assay  
6 method (ELISA or IM technique). True positives (TP), false positives (FP), false negatives  
7 (FN), and true negatives (TN) for urine IgG antibody diagnose were included. Extraction of  
8 studies was performed independently by two reviewers (Yuehua Gong and Qiuping Li).  
9 Discrepancies were discussed with the third researcher (Yuan Yuan) and agreement was  
10 eventually reached. If a study was selected for the systematic review but did not provide data  
11 that could be included in the meta-analysis, the authors were contacted via e-mail. If the  
12 authors did not reply or did not provide the requested information, then this article would be  
13 excluded. QUADAS-2 summary plots were outlined in Table 2 and Supplemental Figure 2  
14 [19].

### 25 *Statistical analysis*

26 The following parameters representing test accuracy were calculated based on the data  
27 (TP, FP, FN, and TN) we extracted from each included studies: the pooled sensitivity,  
28 specificity, PLR, NLR, DOR, and corresponding 95% confidence intervals (95% CI).  
29 Simultaneously, the SROC was also assessed. The heterogeneity was measured by Q test and  
30 the inconsistency index ( $I^2$ ), and  $P < 0.05$  and  $I^2 > 50\%$  indicated significant heterogeneity  
31 among studies. The random-effect model (DerSimonian-Laird method) was conducted for the  
32 meta-analysis to calculate the pooled sensitivity, specificity, and other related indexes of the  
33 studies, and meta-regression was performed to detect the source of the heterogeneity;  
34 otherwise, the fixed-effect model (MantelHaenszel method) was chosen.

35 In addition, the Spearman correlation coefficient was used to verify if the heterogeneity  
36 in meta-analysis could be explained by a threshold effect, which was defined as a positive  
37 correlation ( $P < 0.05$ ). Subgroup analyses were performed for region, age, study population  
38 and assay method. Deek's Funnel Plot Asymmetry Test was applied to determine the presence  
39 of publication bias using STATA 12.1 software (Stata Corp., College Station, Texas, USA.)  
40 [20]. MetaDisc (version 1.4) software [21] was also used to calculate other parameters of  
41 diagnostic performance. All  $P$  values were two-sided, and  $P < 0.05$  was considered  
42 statistically significant.

## 56 **Results**

### 58 **Search results**

1  
2  
3 This meta-analysis was organized according to the PRISMA statement (Supplemental file 1).  
4 Figure 1 summarizes the search process and numerical selection of the final papers that were  
5 included in the systematic review and meta-analysis. A systematic search of biomedical  
6 databases resulted in 423 hits, and after excluding duplicates, 246 citations were identified.  
7 No unpublished literature relevant to the topic was identified. Forty papers were selected  
8 based on their abstracts and titles and were read in full for eligibility. Two eligible studies  
9 referred to the same study group; hence, only one of these was included in the systematic  
10 review [10,18]. Twenty-four individual studies fulfilled the eligibility criteria and were  
11 included in the systematic review [7-9,11,12,14-18],[13,22-31]. Of these, 23 studies had  
12 extractable data after contacting the authors and were included in the meta-analysis  
13 [7-9][11-13,15-18,22-24,26,28,30-33]. A flowchart detailing the study selection process is  
14 shown in Figure 1.  
15  
16  
17  
18  
19  
20  
21  
22  
23

### 24 **Study characteristics**

25 Baseline characteristics of the eligible studies are summarized in Table 1. A total of 23 studies  
26 with 4963 participants were included in the meta-analysis. Of these, three were conducted in  
27 the United States [7,17,23], two in Europe [12,13], and the remaining 18 in Asia. All eligible  
28 studies were published between 2000 and 2014. Sample sizes ranged from 21–449. Urinary *H.*  
29 *pylori* IgG was detected using ELISA in nine studies, using IM in nine studies, and using  
30 both assays in five studies. Key data were successfully extracted from all studies, including  
31 TPs, FPs, FNs, and TNs. The number of TPs ranged from 12–237, FNs from 0–83, FPs from  
32 0–66, and TNs from 2–176.  
33  
34  
35  
36  
37  
38  
39  
40

### 41 **Diagnostic accuracy and threshold analysis**

42 Spearman's correlation coefficient was first used to determine the existence of the threshold  
43 effect because it is an important source of heterogeneity. The Spearman's correlation  
44 coefficient for sensitivity and 1-specificity in the meta-analysis was 0.161, with a *P*-value of  
45 0.413, suggesting no heterogeneity from the threshold effect. Heterogeneity was measured  
46 using the Q test and the inconsistency index ( $I^2$ ) to choose the appropriate calculation model.  
47 Significant heterogeneity was detected in the pooled diagnostic odds ratio (DOR) (DOR = 73,  
48  $I^2 = 75\%$ ,  $P = 0.0000$ ) (Figure 2). Therefore, the random effects model was used to calculate  
49 sensitivity, specificity, the positive likelihood ratio (PLR), and DOR.  
50  
51  
52  
53  
54  
55

56 Based on TP, TN, FP, and FN data extracted from the included studies, we evaluated  
57 the diagnostic accuracy of urinary IgG in *H. pylori* diagnosis from the following quantitative  
58  
59  
60

1  
2  
3 parameters: pooled sensitivity and specificity were 0.83 (95% CI: 0.82–0.85; Figure 3a) and  
4 0.89 (95% CI: 0.88–0.90; Figure 3b), respectively; pooled PLR and negative likelihood ratio  
5 (NLR) were 8.81 (95% CI: 6.37–12.2; Figure 3c) and 0.13 (95% CI: 0.09–0.2; Figure 3d),  
6 respectively. The summary receiver operating characteristic (sROC) curve for urinary IgG  
7 was positioned near the desirable upper left corner, and the area under the curve (AUC) was  
8 0.9551, indicating that the level of overall accuracy was high (Supplemental Figure 3).  
9  
10  
11  
12

### 13 14 15 **Subgroup analysis**

16 Subgroup analysis was conducted based on age, region, study population, and assay method.  
17 Pooled results are shown in Table 3. A random effects model was used because significant  
18 heterogeneity was observed (all  $I^2 > 50\%$ ). The differences between subgroups were  
19 conclusions based on whether there was the overlap of the 95% CI for each AUCs.  
20  
21  
22  
23

### 24 25 **Age analysis**

26 Seven studies containing 1047 adults (>17 years of age) were evaluated. Pooled sensitivity,  
27 specificity, PLR, and NLR were 0.87 (95% CI: 0.84–0.89), 0.91 (95% CI: 0.88–0.94), 8.13  
28 (95% CI: 4.61–14.33), and 0.13 (95% CI: 0.07–0.22), respectively, with a DOR of 85.12 and  
29 an AUC value of 0.9593(95% CI: 0.92-1.0). The diagnostic performance of urinary IgG was  
30 evaluated for young people in the four other studies containing 644 children ( $\leq 17$  years of  
31 age). Pooled sensitivity, specificity, PLR, and NLR were 0.53 (95% CI: 0.48–0.58), 0.96 (95%  
32 CI: 0.94–0.97), 17.93 (95% CI: 4.83–62.59), and 0.35 (95% CI: 0.22–0.58), respectively,  
33 with a DOR of 61.62 and an AUC value of 0.9632(95% CI: 0.91-1.01). There was no  
34 significant difference in the AUC values between adults and children.  
35  
36  
37  
38  
39  
40  
41  
42

### 43 44 **Regional analysis**

45 Of the 23 included studies, five were from Europe or the United States and the remaining 18  
46 were from Asia. For studies from Europe and the United States, the analysis showed a pooled  
47 sensitivity of 0.80 (95% CI: 0.77–0.82) and a pooled specificity of 0.88 (95% CI: 0.86–0.90).  
48 Combined PLR was 12.05 (95% CI: 5.22–27.8), NLR was 0.16 (95% CI: 0.07–0.38), and  
49 AUC and DOR were 0.9557(95% CI: 0.91-1.0) and 73.75, respectively. For studies from Asia,  
50 the pooled sensitivity was 0.86 (95% CI: 0.84–0.88) and the pooled specificity was 0.9 (95%  
51 CI: 0.88–0.92). Combined PLR was 7.74 (95% CI: 5.77–10.39), NLR was 0.12 (95% CI:  
52 0.07–0.2), DOR was 73.75, and AUC was 0.9553(95% CI: 0.94-0.97). There was no  
53 significant difference in the AUC values between Europe or the United States and Asia.  
54  
55  
56  
57  
58  
59  
60

### Study population analysis

Study population analysis, of both patients and healthy controls, was performed in the systematic review. A total of 16 patient studies and five studies of healthy controls or individuals with no upper abdominal symptoms were evaluated. In the patient population, pooled sensitivity, specificity, PLR, and NLR were 0.84 (95% CI: 0.82–0.85), 0.87 (95% CI: 0.85–0.89), 7.17 (95% CI: 5.18–9.93), and 0.14 (95% CI: 0.09–0.23), respectively, with a DOR of 54.29 and AUC value of 0.9436(95% CI: 0.92-0.96). In the healthy population, pooled sensitivity, specificity, PLR, and NLR were 0.75 (95% CI: 0.69–0.80), 0.97 (95% CI: 0.94–0.98), 16.25 (95% CI: 6.94–38.06), and 0.13 (95% CI: 0.03–0.53), respectively, with a DOR of 156.11 and AUC value of 0.98(95% CI: 0.96-1.0). Except for pooled sensitivity, the diagnostic performance of the urine IgG assay was better for the healthy population than the patient population. However, there was no significant difference in AUC values between patients and controls.

### Assay method analysis

Of all studies included, urinary *H. pylori* IgG was detected using ELISA in nine, IM in nine, and both assays in five. For studies that used ELISA, the pooled sensitivity was 0.86 (95% CI: 0.84–0.87) and pooled specificity was 0.87 (95% CI: 0.84–0.88). Combined PLR was 7.92 (95% CI: 5.02–12.5), NLR was 0.12 (95% CI: 0.07–0.23), and AUC and DOR were 0.9521 and 67.46, respectively. For studies that used IM, pooled sensitivity, specificity, PLR, and NLR were 0.81 (95% CI: 0.78–0.83), 0.92 (95% CI: 0.89–0.93), 9.81 (95% CI: 6.28–15.34), and 0.14 (95% CI: 0.07–0.28), respectively, with a DOR of 82.94 and AUC value of 0.9584. No significant difference was detected between ELISA and IM for the diagnostic accuracy of urine antibody detection.

### Meta-regression analysis

Heterogeneity was found in summary estimates for sensitivity, specificity, PLR, NLR, and DOR. Therefore, meta-regression was conducted to examine the source of heterogeneity based on region, sample size, age, study population, blind design, quality of study, and assay method. The results indicated that study population and quality of study were the important factors contributing to heterogeneity ( $P = 0.0189$  and  $P = 0.0295$ , respectively) (Table 4).

### Publication bias

1  
2  
3 Because publication bias is recognized as an important factor that influences the results of  
4 meta-analyses [34], the Deeks' funnel plot asymmetry test was performed to examine  
5 publication bias (Supplemental Figure 4). The test returned a *P*-value of 0.124, suggesting no  
6 significant publication bias was found in the pooled analysis of the studies.  
7  
8  
9

## 10 11 **Discussion**

12 Non-invasive tests for the assessment of *H. pylori* status have become part of patient  
13 management strategies [35-37]. Preliminary studies have explored the diagnostic accuracy of  
14 testing for anti-*H. pylori* antibodies in urine, but the results are inconclusive. In the present  
15 study, we performed comprehensive database searches for all eligible studies reporting the  
16 diagnostic accuracy of testing for anti-*H. pylori* antibodies in urine. Our meta-analysis was  
17 strengthened by the use of a standard protocol, strict inclusion criteria, standardized data  
18 extraction, and independent reviewers. To the best of our knowledge, this is the first study  
19 assessing the summary predictive value of anti-*H. pylori* IgG in urine for infection diagnosis.  
20  
21  
22  
23  
24  
25  
26

27 *Anti-H. pylori* IgG in urine is detectable and has been used for the diagnosis of *H. pylori*  
28 infection, but a comprehensive evaluation of the test performance is needed before its wider  
29 application. After pooling data, we obtained a pooled sensitivity of 0.83 and a pooled  
30 specificity of 0.89, which represent good markers for *H. pylori* diagnosis. The sROC curve,  
31 which assesses overall test performance by showing the trade-off between sensitivity and  
32 specificity [38,39], had an AUC of 0.9551, suggesting a good level of accuracy. Another  
33 indicator of diagnostic accuracy is DOR, which combines sensitivity and specificity data into  
34 a single number ranging from 0 to infinity, with higher values indicating better discriminatory  
35 test performances [40]. The mean DOR in the meta-analysis was 73, suggesting that testing  
36 for anti-*H. pylori* antibodies in urine should be helpful in the diagnosis of *H. pylori* infection.  
37 We further examined the diagnostic accuracy of an anti-*H. pylori* antibody in urine by  
38 calculating the PLR and NLR, which can be easier to relate to clinical practice than sROC  
39 and DOR. The pooled PLR was 8.81 and the pooled NLR was 0.13, indicating that the  
40 presence of anti-*H. pylori* antibodies in urine has an important function in diagnosing *H.*  
41 *pylori* infection. Substantial heterogeneity was found with meta-analysis, so the random  
42 effects model was used to synthesize the above data. Our results show that anti-*H. pylori* IgG  
43 represents a good marker for the diagnosis of *H. pylori* infection.  
44  
45  
46  
47  
48  
49  
50  
51  
52  
53  
54

55 Heterogeneity is an important factor that can affect the results of meta-analysis. Therefore,  
56 we used the Spearman's correlation coefficient to clarify whether the threshold effect  
57  
58  
59  
60

1  
2  
3 contributed to the source of heterogeneity. The Spearman's correlation coefficient was 0.193,  
4 with a *P*-value of 0.334, suggesting that heterogeneity among the included studies could not  
5 have been induced by the threshold effect. We further used subgroup analysis based on study  
6 population, region, age, and assay method to explore heterogeneity. No significant difference  
7 in age, region, or assay method was detected, but subgroup analysis for the study population  
8 revealed a little difference in AUC values between patients and controls, suggesting a  
9 relatively high level of diagnostic accuracy in the healthy population, although there was the  
10 overlap of the 95% CI for each AUCs of study population subgroup. In meta-analysis, the  
11 patient population included dyspeptic, chronic gastritis, and peptic ulcer patients amongst  
12 others. It is possible that the disease condition in the stomach may cause a change in *H. pylori*  
13 colonization [41]. On the other hand, *H. pylori* IgG is not synchronized with the *H. pylori*  
14 infection process, so the delayed generation or disappearance of *H. pylori* colonization for  
15 several months may affect the level of anti-*H. pylori* IgG in the urine [42]. Indeed,  
16 Graham *et al.* [23] reported that urine tests may remain positive for an extended time after  
17 successful treatment of the infection. This may be an important factor affecting the accuracy  
18 of the antibody test in the diseased population. The meta-regression analysis also  
19 demonstrated that study population was an important factor contributing to heterogeneity,  
20 which is consistent with subgroup analysis. These findings indicate that *H. pylori* infection  
21 diagnosis by anti-*H. pylori* IgG in the urine requires extra caution in diseased populations.  
22  
23  
24  
25  
26  
27  
28  
29  
30  
31  
32  
33

34 The QUADAS tool was developed and evaluated by Whiting *et al.* [43] and is  
35 recommended by the Cochrane diagnostic accuracy systematic reviews [44] to provide a  
36 methodological assessment of the quality of diagnostic accuracy studies. Experience, reports  
37 from users, and feedback from the Cochrane Collaboration suggested the potential for  
38 improvements; therefore, QUADAS-2 was developed [19] and has been shown to be a  
39 considerable improvement over the original tool. The responses to QUADAS-2 signalling  
40 questions are assessed in terms of risk of bias or concerns regarding applicability. In the  
41 present meta-analysis, 23 of the included studies were qualified using QUADAS-2  
42 assessment, which included a score of 7 for one study, a score of 8 for nine studies, a score of  
43 9 for four studies, and a score of 10 or more for nine studies. Meta-regression analysis  
44 showed that the quality of included studies was another factor for heterogeneity. Therefore, a  
45 difference in diagnostic accuracy was present between low and high scoring studies  
46 according to regression analysis. This indicates that meta-analyses should include as many  
47 high-quality articles as possible to improve their accuracy.  
48  
49  
50  
51  
52  
53  
54  
55  
56  
57

58 There are several limitations to our meta-analysis that should be borne in mind when  
59  
60

1  
2  
3 interpreting the results. First, the studies included are not an exhaustive list because the  
4 search range was limited to published studies. Unpublished research, such as conference  
5 papers, cannot be obtained so it is possible that some relevant literature has been missed.  
6  
7 Additionally, only studies published in English or Chinese were included. Second, for articles  
8 that contained different cut-off values within the same study, we selected cut-off values  
9 according to the manufacturers' recommendations. However, these may not be the most  
10 appropriate values for specific areas.  
11  
12

13  
14 In conclusion, testing for anti-*H. pylori* antibodies in urine appears to have an  
15 important function and represents a good marker for the diagnosis of *H. pylori* infection.  
16 Sources of heterogeneity were found to come from the quality of the studies included, and  
17 from the study population. Further large-scale, well-designed studies examining different  
18 study populations are required to confirm the results of this meta-analysis.  
19  
20  
21  
22  
23

#### 24 **Acknowledgements**

25  
26 This work was supported by a grant from Natural Science Foundation of Liaoning Province  
27 (201602822).  
28  
29  
30  
31  
32

#### 33 **Author contributions**

34  
35 GYH and YY wrote the main manuscript text and LQP analyzed the data. All authors  
36 reviewed the manuscript.  
37  
38  
39  
40  
41

#### 42 **Competing financial interests**

43  
44 The authors declare that they have no competing financial interests.  
45  
46  
47  
48

#### 49 **Data sharing statement**

50  
51 No additional unpublished data are available.  
52  
53  
54  
55  
56  
57  
58  
59  
60

## References

1. Covacci A, Telford JL, Del Giudice G, Parsonnet J, Rappuoli R (1999) *Helicobacter pylori* virulence and genetic geography. *Science* 284: 1328-1333.
2. Peek RM, Jr., Blaser MJ (2002) *Helicobacter pylori* and gastrointestinal tract adenocarcinomas. *Nat Rev Cancer* 2: 28-37.
3. Suerbaum S, Michetti P (2002) *Helicobacter pylori* infection. *N Engl J Med* 347: 1175-1186.
4. Plebani A, Notarangelo LD, Monafo V, Nespoli L, Ugazio AG (1984) A new immunoperoxidase assay for *Lolium perenne*-specific IgE in serum based on the biotin/avidin system (BAS). *Clin Allergy* 14: 373-378.
5. Yamamoto T, Tamura M, Ishii T, Anjiki H, Hattori K, et al. (2003) Urinary antibody titers to *Helicobacter pylori* and an impact of clinical characteristics. *J Clin Gastroenterol* 36: 329-331.
6. Yamamoto T, Kojima K, Sanaka M, Ishii T, Osaki Y, et al. (2006) Reliability of rapid urinary test for antibody to *Helicobacter pylori* in adult patients with proteinuria. *Diagn Microbiol Infect Dis* 54: 105-108.
7. Alemohammad MM, Foley TJ, Cohen H (1993) Detection of immunoglobulin G antibodies to *Helicobacter pylori* in urine by an enzyme immunoassay method. *J Clin Microbiol* 31: 2174-2177.
8. Katsuragi K, Noda A, Tachikawa T, Azuma A, Mukai F, et al. (1998) Highly sensitive urine-based enzyme-linked immunosorbent assay for detection of antibody to *Helicobacter pylori*. *Helicobacter* 3: 289-295.
9. Miwa H, Hirose M, Kikuchi S, Terai T, Iwazaki R, et al. (1999) How useful is the detection kit for antibody to *Helicobacter pylori* in urine (URINELISA) in clinical practice? *Am J Gastroenterol* 94: 3460-3463.
10. Okuda M, Nakazawa T, Booka M, Miyashiro E, Yosikawa N (2004) Evaluation of a urine antibody test for *Helicobacter pylori* in Japanese children. *J Pediatr* 144: 196-199.
11. Shimizu T, Yarita Y, Haruna H, Kaneko K, Yamashiro Y, et al. (2003) Urine-based enzyme-linked immunosorbent assay for the detection of *Helicobacter pylori* antibodies in children. *J Paediatr Child Health* 39: 606-610.
12. Leodolter A, Vaira D, Bazzoli F, Schutze K, Hirschl A, et al. (2003) European multicentre validation trial of two new non-invasive tests for the detection of *Helicobacter pylori* antibodies: urine-based ELISA and rapid urine test. *Aliment Pharmacol Ther* 18: 927-931.
13. Megraud F (2005) Comparison of non-invasive tests to detect *Helicobacter pylori* infection in children and adolescents: results of a multicenter European study. *J Pediatr* 146: 198-203.
14. Quach DT, Hiyama T, Shimamoto F, Le QD, Ho LX, et al. (2014) Value of a new stick-type rapid urine test for the diagnosis of *Helicobacter pylori* infection in the Vietnamese population. *World J Gastroenterol* 20: 5087-5091.
15. Demiray Gurbuz E, Gonen C, Bekmen N, Dolek D, Soy Turk M, et al. (2012) The diagnostic accuracy of urine IgG antibody tests for the detection of *Helicobacter pylori* infection in Turkish dyspeptic patients. *Turk J Gastroenterol* 23: 753-758.
16. Lu CY, Kuo FC, Wang SW, Lo YC, Wu IC, et al. (2006) The clinical applications and accuracy of 2 rapid near-patient tests in detecting *Helicobacter pylori* infection. *Diagn Microbiol Infect Dis* 56: 241-246.
17. Opekun AR, Luu P, Gotschall AB, Abdalla N, Torres E, et al. (2006) Point-of-care *Helicobacter pylori* urine antibody detection in a multi-ethnic adult population in the United States. *Transl Res* 148: 13-18.
18. Okuda M, Kamiya S, Booka M, Kikuchi S, Osaki T, et al. (2013) Diagnostic accuracy of urine-based kits for detection of *Helicobacter pylori* antibody in children. *Pediatr Int* 55: 337-341.
19. Whiting PF, Rutjes AW, Westwood ME, Mallett S, Deeks JJ, et al. (2011) QUADAS-2: a revised tool for the quality assessment of diagnostic accuracy studies. *Ann Intern Med* 155: 529-536.
20. Deeks JJ, Macaskill P, Irwig L (2005) The performance of tests of publication bias and other sample size effects in systematic reviews of diagnostic test accuracy was assessed. *J Clin Epidemiol* 58: 882-893.
21. Zamora J, Abaira V, Muriel A, Khan K, Coomarasamy A (2006) Meta-DiSc: a software for meta-analysis of test accuracy data. *BMC Med Res Methodol* 6: 31.
22. Yamamoto S, Uemura N, Okamoto S, Yamaguchi S, Mashiba H, et al. (2000) A new rapid test for detecting anti-*Helicobacter pylori* antibody excreted into urine. *Helicobacter* 5: 160-164.
23. Graham DY, Reddy S (2001) Rapid detection of anti-*Helicobacter pylori* IgG in urine using immunochromatography. *Aliment Pharmacol Ther* 15: 699-702.
24. Fujisawa T, Kaneko T, Kumagai T, Akamatsu T, Katsuyama T, et al. (2001) Evaluation of urinary rapid test for *Helicobacter pylori* in general practice. *J Clin Lab Anal* 15: 154-159.
25. Wu DC, Kuo CH, Lu CY, Su YC, Yu FJ, et al. (2001) Evaluation of an office-based urine test for detecting *Helicobacter pylori*: a Prospective Pilot Study. *Hepatogastroenterology* 48: 614-617.
26. Miwa H, Akamatsu S, Tachikawa T, Sogabe T, Ohtaka K, et al. (2001) On-site diagnosis of H-pylori infection by urine. *Diagnostic Microbiology and Infectious Disease* 39: 95-97.



- 1
- 2
- 3 27. Adachi K, Kawamura A, Ono M, Masuzaki K, Takashima T, et al. (2002) Comparative evaluation of
- 4 urine-based and other minimally invasive methods for the diagnosis of *Helicobacter pylori* infection. *J*
- 5 *Gastroenterol* 37: 703-708.
- 6 28. Wong WM, Wong BC, Xia HH, Tang VS, Lai KC, et al. (2002) An evaluation of a rapid urine test
- 7 for the diagnosis of *Helicobacter pylori* infection in the Chinese population. *Aliment Pharmacol Ther*
- 8 16: 813-817.
- 9 29. Kuo FC, Wang SW, Wu IC, Yu FJ, Yang YC, et al. (2005) Evaluation of urine ELISA test for detecting
- 10 *Helicobacter pylori* infection in Taiwan: a prospective study. *World J Gastroenterol* 11: 5545-5548.
- 11 30. Muhsen K, Athamna A, Athamna M, Spungin-Bialik A, Cohen D (2006) Evaluation of a urine-based
- 12 enzyme-linked immunosorbent assay test for the detection of *Helicobacter pylori* infection among 3- to
- 13 5-year-old Israeli Arab healthy children. *J Pediatr Gastroenterol Nutr* 43: 398-401.
- 14 31. Nguyen LT, Uchida T, Tsukamoto Y, Trinh TD, Ta L, et al. (2010) Evaluation of rapid urine test for the
- 15 detection of *Helicobacter pylori* infection in the Vietnamese population. *Dig Dis Sci* 55: 89-93.
- 16 32. Quach DT, Hiyama T, Shimamoto F, Le QD, Ho LX, et al. (2014) Value of a new stick-type rapid urine test
- 17 for the diagnosis of *Helicobacter pylori* infection in the Vietnamese population. *World Journal of*
- 18 *Gastroenterology* 20: 5087-5091.
- 19 33. Kuo F-C, Wang S-W, Wu IC, Yu F-J, Yang Y-C, et al. (2005) Evaluation of urine ELISA test for detecting
- 20 *Helicobacter pylori* infection in Taiwan: A prospective study. *World Journal of Gastroenterology* 11:
- 21 5545-5548.
- 22 34. Sterne JA, Gavaghan D, Egger M (2000) Publication and related bias in meta-analysis: power of statistical
- 23 tests and prevalence in the literature. *J Clin Epidemiol* 53: 1119-1129.
- 24 35. Malfertheiner P, Megraud F, O'Morain CA, Atherton J, Axon AT, et al. (2012) Management of *Helicobacter*
- 25 *pylori* infection--the Maastricht IV/ Florence Consensus Report. *Gut* 61: 646-664.
- 26 36. Wang YK, Kuo FC, Liu CJ, Wu MC, Shih HY, et al. (2015) Diagnosis of *Helicobacter pylori* infection:
- 27 Current options and developments. *World J Gastroenterol* 21: 11221-11235.
- 28 37. Miftahussurur M, Yamaoka Y (2016) Diagnostic Methods of *Helicobacter pylori* Infection for
- 29 Epidemiological Studies: Critical Importance of Indirect Test Validation. *Biomed Res Int* 2016:
- 30 4819423.
- 31 38. Hamza TH, van Houwelingen HC, Heijnenbroek-Kal MH, Stijnen T (2009) Associating explanatory variables
- 32 with summary receiver operating characteristic curves in diagnostic meta-analysis. *J Clin Epidemiol* 62:
- 33 1284-1291.
- 34 39. Schlattmann P, Verba M, Dewey M, Walther M (2015) Mixture models in diagnostic
- 35 meta-analyses--clustering summary receiver operating characteristic curves accounted for
- 36 heterogeneity and correlation. *J Clin Epidemiol* 68: 61-72.
- 37 40. Chen KF, Chaou CH, Jiang JY, Yu HW, Meng YH, et al. (2016) Diagnostic Accuracy of
- 38 Lipopolysaccharide-Binding Protein as Biomarker for Sepsis in Adult Patients: A Systematic Review
- 39 and Meta-Analysis. *PLoS One* 11: e0153188.
- 40 41. Bucker R, Azevedo-Vethacke M, Groll C, Garten D, Josenhans C, et al. (2012) *Helicobacter pylori*
- 41 colonization critically depends on postprandial gastric conditions. *Sci Rep* 2: 994.
- 42 42. Gong Y, Wei W, Jingwei L, Nannan D, Yuan Y (2015) *Helicobacter pylori* Infection Status Correlates with
- 43 Serum Parameter Levels Responding to Multi-organ Functions. *Dig Dis Sci* 60: 1748-1754.
- 44 43. Whiting P, Rutjes AW, Reitsma JB, Bossuyt PM, Kleijnen J (2003) The development of QUADAS: a tool
- 45 for the quality assessment of studies of diagnostic accuracy included in systematic reviews. *BMC Med*
- 46 *Res Methodol* 3: 25.
- 47 44. Leeflang MM, Deeks JJ, Takwoingi Y, Macaskill P (2013) Cochrane diagnostic test accuracy reviews. *Syst*
- 48 *Rev* 2: 82.
- 49
- 50
- 51
- 52
- 53
- 54
- 55
- 56
- 57
- 58
- 59
- 60

1  
2  
3 **Figure legends**  
4  
5  
6

7 **Figure 1.** Flow diagram of the literature search.  
8  
9

10 **Figure 2.** Forest plots of DOR for *H. pylori* diagnosis by urine IgG antibody. The pooled diagnostic odds  
11 ratio was 73 (95%CI: 46.45–114.74).  
12  
13

14 **Figure 3.** Forest plots of sensitivity, specificity, PLR, and NLR for *H. pylori* diagnosis by urine IgG  
15  
16 (a) The summary sensitivity was 0.83 (95% CI: 0.82–0.85;  $I^2 = 94.4\%$ ). (b) The summary specificity was  
17 0.89 (95% CI: 0.87–0.90;  $I^2 = 86.1\%$ ). (c) The summary PLR was 8.5 (95% CI: 6.27–12.2;  $I^2 = 81.0\%$ ). (d)  
18 The summary NLR of all articles was 0.13 (95% CI: 0.09–0.20;  $I^2 = 96.3\%$ ).  
19  
20  
21  
22  
23  
24  
25  
26  
27  
28  
29  
30  
31  
32  
33  
34  
35  
36  
37  
38  
39  
40  
41  
42  
43  
44  
45  
46  
47  
48  
49  
50  
51  
52  
53  
54  
55  
56  
57  
58  
59  
60

Table 1. Characteristics of the studies included in the meta-analysis

| Author                 | Ethnicity    | Year | Region  | No. of cases | Age      | Diseases | Reference standard | Blind design | Assay method | TP(a) | FP(b) | FN(c) | TN(d) |
|------------------------|--------------|------|---------|--------------|----------|----------|--------------------|--------------|--------------|-------|-------|-------|-------|
| Mohammad M             | American     | 1993 | America | 306          | MIX      | Patient  | C,HE,R             | N.A.         | ELISA        | 237   | 6     | 10    | 53    |
| Kiyonori Katsuragi     | Japanese     | 1998 | Asia    | 119          | N.A.     | MIX      | U                  | N.A.         | ELISA        | 69    | 0     | 1     | 49    |
| Hiroto Miwa            | Japanese     | 1999 | Asia    | 132          | Adult    | Patient  | U                  | Yes          | ELISA        | 63    | 5     | 10    | 54    |
| Mototsugu Kato         | Japanese     | 2000 | Asia    | 189          | N.A.     | Patient  | C,H,R              | N.A.         | ELISA        | 127   | 12    | 5     | 45    |
| Soichiro Yamamoto      | Japanese     | 2000 | Asia    | 117          | N.A.     | mix      | H,S                | N.A.         | IM           | 81    | 2     | 7     | 27    |
| D. Y. Graham           | American     | 2001 | America | 104          | Adult    | healthy  | U                  | Yes          | IM           | 41    | 2     | 2     | 59    |
| Toru Fujisawa          | Japanese     | 2001 | Asia    | 21           | Adult    | healthy  | C,H,R              | N.A.         | IM           | 18    | 1     | 0     | 2     |
| Hiroto Miwa            | Japanese     | 2001 | Asia    | 155          | Adult    | Patient  | U                  | N.A.         | IM           | 93    | 7     | 4     | 51    |
| Kyoichi Adachi         | Japanese     | 2002 | Asia    | 100          | MIX      | healthy  | U                  | Yes          | ELISA        | 32    | 2     | 3     | 37    |
|                        |              |      |         |              |          |          |                    |              | IM           | 30    | 1     | 5     | 38    |
| W. M. Wong             | Chinese      | 2002 | Asia    | 123          | Adult    | Patient  | R,H                | Yes          | IM           | 58    | 3     | 2     | 60    |
| Youke Lu               | Chinese      | 2002 | Asia    | 102          | MIX      | Patient  | C,R,H              | N.A.         | ELISA        | 60    | 4     | 2     | 27    |
| A. Leodolter, D. Vaira | European     | 2003 | Europe  | 449          | N.A.     | Patient  | C,H,R              | N.A.         | IM           | 178   | 34    | 38    | 170   |
|                        |              |      |         |              |          |          |                    |              | ELISA        | 193   | 66    | 23    | 140   |
| T Shimizu              | Japanese     | 2003 | Asia    | 68           | Children | Patient  | U, SA              | N.A.         | ELISA        | 12    | 13    | 1     | 42    |
| Antone R. Opekun       | American     | 2004 | America | 188          | Adult    | Patient  | U,S                | Yes          | IM           | 72    | 0     | 8     | 87    |
| Fu-Chen Kuo            | Chinese      | 2005 | Asia    | 317          | MIX      | Patient  | C,R,H,U            | N.A.         | ELISA        | 211   | 8     | 19    | 79    |
| Francis Megraud        | European     | 2005 | Europe  | 316          | Children | Patient  | C,H,R              | Yes          | ELISA        | 86    | 4     | 50    | 176   |
|                        |              |      |         |              |          |          |                    |              | IM           | 36    | 2     | 83    | 151   |
| Yanfang Gong           | Chinese      | 2005 | Asia    | 215          | MIX      | Patient  | U                  | Yes          | ELISA        | 80    | 19    | 16    | 100   |
| Chien-Yu Lu            | Chinese      | 2006 | Asia    | 120          | NA       | Patient  | C,HE,R,U           | Yes          | IM           | 54    | 6     | 8     | 52    |
| Khitam Muhsen          | Israeli Arab | 2006 | Asia    | 159          | Children | healthy  | SA                 | N.A.         | ELISA        | 27    | 3     | 52    | 77    |
| Lam Tung Nguyen        | Vietnamese   | 2010 | Asia    | 148          | MIX      | Patient  | C,IM,S             | Yes          | IM           | 66    | 6     | 17    | 59    |
| Demray Gürbüz E        | Turks        | 2012 | Asia    | 124          | Adult    | Patient  | C,H,R              | Yes          | IM           | 61    | 8     | 21    | 34    |
|                        |              |      |         |              |          |          |                    |              | ELISA        | 61    | 8     | 21    | 34    |
| Masumi Okuda           | Japanese     | 2013 | Asia    | 101          | Children | healthy  | U, SA              | Yes          | ELISA        | 34    | 2     | 3     | 62    |
|                        |              |      |         |              |          |          |                    |              | IM           | 29    | 0     | 7     | 64    |
| Duc T Quach            | Vietnamese   | 2014 | Asia    | 200          | Adult    | Patient  | R,H                | N.A.         | IM           | 94    | 9     | 17    | 80    |

C: culture, HE: hematoxylin and eosin, H: histology, R: rapid urease test, U: urea breath test, SA: stool, IM: immunochromatographic technique, S: serology.

**Table 2.** Summary of QUADAS-2 assessments of included studies

| Author                 | 1 | 2 | 3 | 4 | 5 | 6 | 7 | 8 | 9 | 10 | 11 | 12 | 13 | 14 | Quantity |
|------------------------|---|---|---|---|---|---|---|---|---|----|----|----|----|----|----------|
| Mohammad M             | N | Y | Y | Y | U | Y | N | Y | U | N  | U  | Y  | Y  | Y  | 8        |
| Kiyonri Katsuragi      | N | Y | Y | Y | U | Y | N | Y | U | N  | U  | Y  | Y  | Y  | 8        |
| Hiroto Miwa            | N | Y | Y | Y | Y | Y | N | Y | Y | N  | Y  | Y  | Y  | Y  | 11       |
| Mototsugu Kato         | U | Y | Y | Y | U | Y | N | Y | U | N  | U  | Y  | Y  | Y  | 8        |
| Soichiro Yamamoto      | U | Y | Y | Y | U | Y | N | Y | U | N  | Y  | Y  | Y  | Y  | 8        |
| D. Y. Graham           | N | Y | Y | Y | Y | Y | N | Y | Y | N  | U  | Y  | Y  | Y  | 10       |
| Toru Fujisawa          | U | Y | Y | Y | U | Y | N | Y | U | N  | U  | Y  | Y  | Y  | 8        |
| Hiroto Miwa            | Y | Y | Y | Y | U | Y | N | Y | U | N  | Y  | Y  | Y  | Y  | 10       |
| Kyoichi Adachi         | N | Y | Y | Y | Y | Y | N | Y | Y | N  | Y  | Y  | Y  | Y  | 11       |
| W. M. WONG             | U | Y | Y | Y | Y | Y | N | Y | Y | N  | U  | Y  | Y  | Y  | 10       |
| Youke Lu               | Y | Y | Y | Y | U | Y | N | Y | U | N  | Y  | Y  | Y  | Y  | 10       |
| A. LEODOLTER, D. VAIRA | N | Y | Y | Y | U | Y | N | Y | U | N  | U  | Y  | Y  | Y  | 8        |
| T Shimizu              | N | Y | Y | Y | U | Y | N | Y | U | N  | Y  | Y  | Y  | Y  | 9        |
| Antone R. Opekun       | Y | Y | Y | Y | U | Y | Y | Y | Y | Y  | Y  | Y  | Y  | Y  | 13       |
| Fu-Chen Kuo            | N | Y | Y | Y | U | Y | N | Y | U | N  | Y  | Y  | Y  | Y  | 9        |
| Francis Megraud        | U | Y | Y | Y | Y | Y | N | Y | Y | N  | Y  | Y  | Y  | Y  | 11       |
| Chien-Yu Lu            | N | Y | Y | Y | Y | Y | N | Y | Y | N  | Y  | Y  | Y  | Y  | 11       |
| Yanfang Gong           | U | Y | N | Y | Y | Y | N | Y | Y | N  | U  | Y  | Y  | Y  | 9        |
| Khitam Muhsen          | N | Y | N | Y | U | Y | N | Y | U | N  | U  | Y  | Y  | Y  | 7        |
| Lam Tung Nguyen        | N | Y | Y | Y | Y | Y | N | Y | Y | N  | U  | Y  | Y  | Y  | 8        |
| Demiray Gürbüz E       | N | Y | Y | Y | U | Y | N | Y | Y | N  | U  | Y  | Y  | Y  | 8        |
| Masumi Okuda           | N | Y | Y | Y | Y | Y | N | Y | Y | N  | Y  | Y  | Y  | Y  | 9        |
| Duc T Quach            | U | Y | Y | Y | U | Y | N | Y | U | N  | U  | Y  | Y  | Y  | 8        |

Y: Yes, N: No, U: Unclear.

1. Was a consecutive or random sample of patients enrolled?
2. Was a case-control design avoided?
3. Did the study avoid inappropriate exclusions?
4. Are there concerns that the included patients and setting do not match the review question?
5. Were the index test results interpreted without knowledge of the results of the reference standard?
6. If a threshold was used, was it prespecified?
7. Are there concerns that the index test, its conduct, or its interpretation differ from the review question?
8. Is the reference standard likely to correctly classify the target condition?
9. Were the reference standard results interpreted without knowledge of the results of the index test?
10. Are there concerns that the target condition as defined by the reference standard does not match the question?
11. Was there an appropriate interval between the index test and reference standard?
12. Did all patients receive the same reference standard?
13. Were all patients included in the analysis?
14. Could the patient flow have introduced bias?

Table 3. Group/subgroup analysis of pooled estimates with 95 % confidence interval for sensitivity, specificity, and positive and negative likelihood ratios

| Group/Subgroup     | Spearman P | Cochrane Q test      |        | Pooled Sensitivity ( 95%CI ) | Pooled Specificity ( 95%CI ) | Pooled Positive LR ( 95%CI ) | Pooled Negative NR ( 95%CI ) | AUC ( 95%CI )       |
|--------------------|------------|----------------------|--------|------------------------------|------------------------------|------------------------------|------------------------------|---------------------|
|                    |            | DOR ( 95%CI )        | P      |                              |                              |                              |                              |                     |
| Overall            | 0.413      | 73(46.45-114.74)     | 0.0000 | 0.83(0.82-0.85)              | 0.89(0.88-0.90)              | 8.81(6.37-12.2)              | 0.13(0.09-0.2)               | 0.96<br>(0.94-0.97) |
| Age                |            |                      |        |                              |                              |                              |                              |                     |
| Children           | 0.397      | 61.62(22.16-171.32)  | 0.0335 | 0.53(0.48-0.58)              | 0.96(0.94-0.97)              | 17.93(4.83-62.59)            | 0.35(0.22-0.58)              | 0.96<br>(0.91-1.01) |
| Adult              | 0.732      | 85.12(29.81-243.06)  | 0.0000 | 0.87(0.84-0.89)              | 0.91(0.88-0.94)              | 8.13(4.61-14.33)             | 0.13(0.07-0.22)              | 0.96<br>(0.92-1.0)  |
| Region             |            |                      |        |                              |                              |                              |                              |                     |
| Asian              | 0.724      | 73.75(43.38-125.38)  | 0.0000 | 0.86 ( 0.84-0.88 )           | 0.9(0.88-0.92)               | 7.74(5.77-10.39)             | 0.12(0.07-0.20)              | 0.96<br>(0.94-0.97) |
| Europe and America | 0.645      | 73.75(29.26-125.38)  | 0.0000 | 0.80 ( 0.77-0.82 )           | 0.88(0.86-0.90)              | 12.05(5.22-27.8)             | 0.16(0.07-0.38)              | 0.96<br>(0.91-1.0)  |
| Study population   |            |                      |        |                              |                              |                              |                              |                     |
| Patient            | 0.616      | 54.29(34.07-86.51)   | 0.0000 | 0.84(0.82-0.85)              | 0.87(0.85-0.89)              | 7.17(5.18-9.93)              | 0.14 ( 0.09-0.23 )           | 0.94<br>(0.92-0.96) |
| Healthy            | 0.294      | 156.11(41.44-588.04) | 0.0073 | 0.75 ( 0.69-0.80 )           | 0.97(0.94-0.98)              | 16.25(6.94-38.06)            | 0.13 ( 0.03-0.53 )           | 0.98<br>(0.96-1.0)  |
| Assay method       |            |                      |        |                              |                              |                              |                              |                     |
| IM                 | 0.5940     | 82.94(41.62-165.29)  | 0.0000 | 0.81(0.78-0.83)              | 0.92(0.90-0.94)              | 9.81 ( 6.28-15.34 )          | 0.14 ( 0.07-0.28 )           | 0.96<br>(0.93-0.98) |
| ELISA              | 0.7820     | 67.46(35.58-127.9)   | 0.0000 | 0.86(0.84-0.87)              | 0.87(0.84-0.88)              | 7.92(5.02-12.5)              | 0.12 ( 0.07-0.23 )           | 0.95<br>(0.93-0.98) |

**Table 4.** Meta-regression of potential heterogeneity within the included studies

| Variables        | Coeff. | Std. Err. | P-value | RDOR | [95%CI]      |
|------------------|--------|-----------|---------|------|--------------|
| Cte.             | -0.98  | 3.4737    | 0.781   | ---- | ----         |
| S                | 0.309  | 0.1614    | 0.0706  | ---- | ----         |
| Region           | -0.459 | 0.8022    | 0.574   | 0.63 | (0.12;3.39)  |
| Sample size      | -0.001 | 0.0041    | 0.8856  | 1    | (0.99;1.01)  |
| Age              | -0.093 | 0.2489    | 0.7117  | 0.91 | (0.54;1.53)  |
| Study population | 1.367  | 0.5326    | 0.0189  | 3.92 | (1.29;11.96) |
| blinded design   | 0.144  | 0.6537    | 0.8282  | 1.15 | (0.29;4.54)  |
| Assay method     | 0.008  | 0.4155    | 0.9841  | 1.01 | (0.42;2.41)  |
| quanlity         | 0.518  | 0.22      | 0.0295  | 1.68 | (1.06;2.66)  |

Cte: Constant coefficient, S: Statistic, Coeff: Constant coefficient, Std. Err: Standard error, RDOR: Relative diagnostic odd ratio.

or peer review only

1  
2  
3  
4  
5  
6  
7  
8  
9  
10  
11  
12  
13  
14  
15  
16  
17  
18  
19  
20  
21  
22  
23  
24  
25  
26  
27  
28  
29  
30  
31  
32  
33  
34  
35  
36  
37  
38  
39  
40  
41  
42  
43  
44  
45  
46  
47  
48  
49  
50  
51  
52  
53  
54  
55  
56  
57  
58  
59  
60

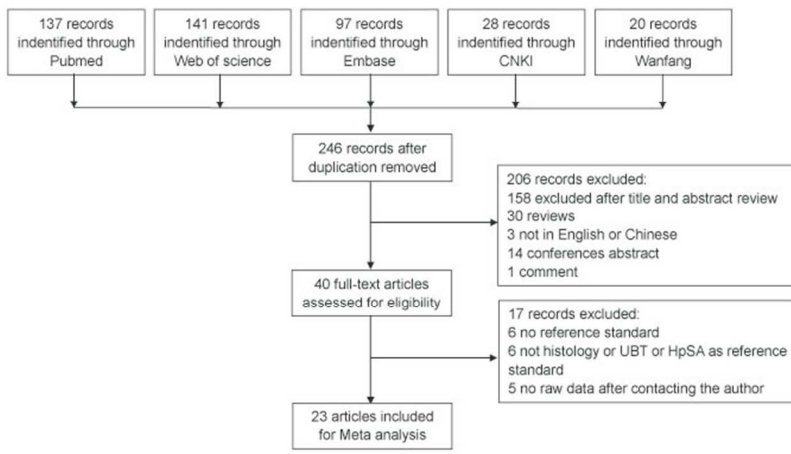

Figure 1. Flow diagram of the literature search.

71x50mm (300 x 300 DPI)

Review only



Figure 2. Forest plots of DOR for H. pylori diagnosis by urine IgG antibody. The pooled diagnostic odds ratio was 73 (95%CI: 46.45–114.74).

103x88mm (300 x 300 DPI)

Only



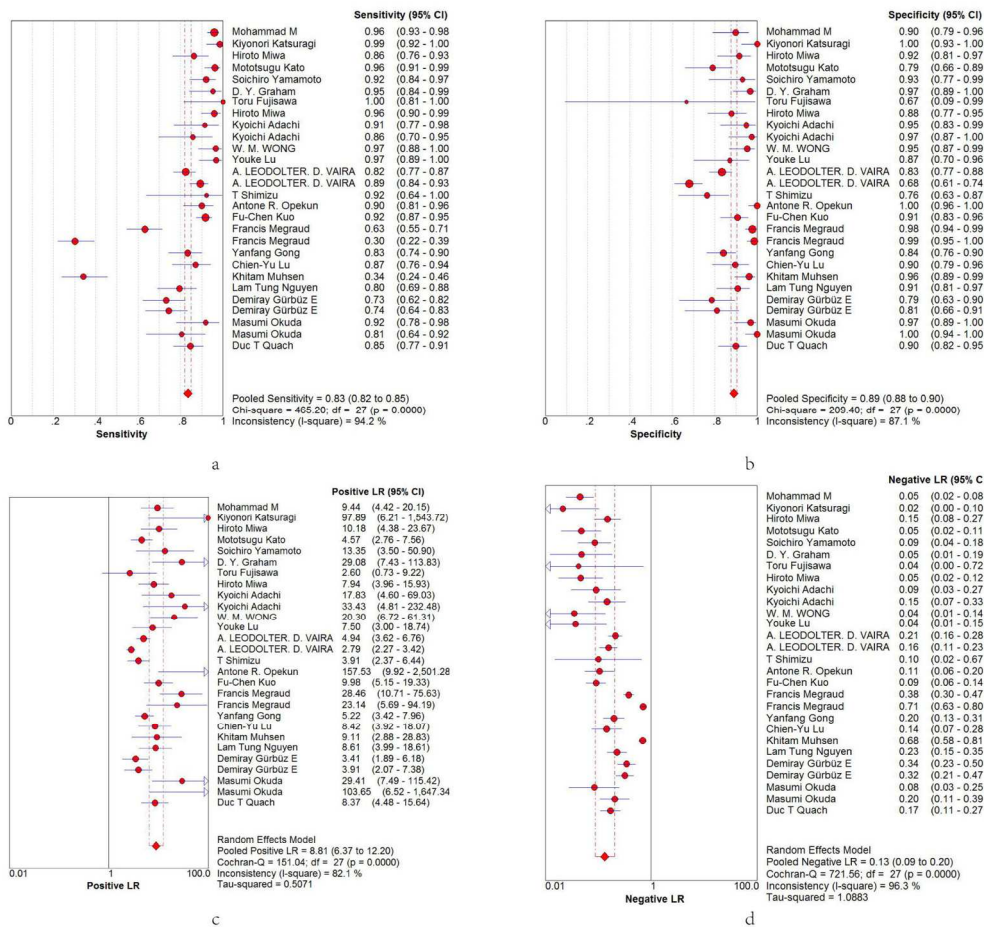

Figure 3. Forest plots of sensitivity, specificity, PLR, and NLR for H. pylori diagnosis by urine IgG antibody. (a) The summary sensitivity was 0.83 (95% CI: 0.82-0.85; I<sup>2</sup> = 94.4%). (b) The summary specificity was 0.89 (95% CI: 0.87-0.90; I<sup>2</sup> = 86.1%). (c) The summary PLR was 8.5 (95% CI: 6.27-12.2; I<sup>2</sup> = 81.0%). (d) The summary NLR of all articles was 0.13 (95% CI: 0.09-0.20; I<sup>2</sup> = 96.3%).

150x140mm (300 x 300 DPI)

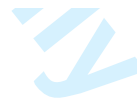

1  
2  
3  
4  
5  
6  
7 #1 H.pylori

8 Search details:

9 "helicobacter pylori"[MeSH Terms] OR ("helicobacter"[All Fields] AND "pylori"[All Fields]) OR

10 "helicobacter pylori"[All Fields] OR "h pylori"[All Fields]

11 #2 Helicobacter pylori

12 #3 #1 OR #2

13 #4 urine IgG antibody

14 Search details:

15 ("urine"[Subheading] OR "urine"[All Fields] OR "urine"[MeSH Terms]) AND IgG[All Fields] AND

16 ("immunoglobulins"[MeSH Terms] OR "immunoglobulins"[All Fields] OR "antibody"[All Fields] OR

17 "antibodies"[MeSH Terms] OR "antibodies"[All Fields])

18 #5 urine antibody

19 #6 #4 OR #5

20 #7 #3 AND #6

21  
22  
23  
24  
25 Supplemental Figure 1. Detail of search strategy as performed in Pubmed.

26  
27 144x76mm (300 x 300 DPI)

28  
29  
30  
31  
32  
33  
34  
35  
36  
37  
38  
39  
40  
41  
42  
43  
44  
45  
46  
47  
48  
49  
50  
51  
52  
53  
54  
55  
56  
57  
58  
59  
60  
review only

1  
2  
3  
4  
5  
6  
7  
8  
9  
10  
11  
12  
13  
14  
15  
16  
17  
18  
19  
20  
21  
22  
23  
24  
25  
26  
27  
28  
29  
30  
31  
32  
33  
34  
35  
36  
37  
38  
39  
40  
41  
42  
43  
44  
45  
46  
47  
48  
49  
50  
51  
52  
53  
54  
55  
56  
57  
58  
59  
60

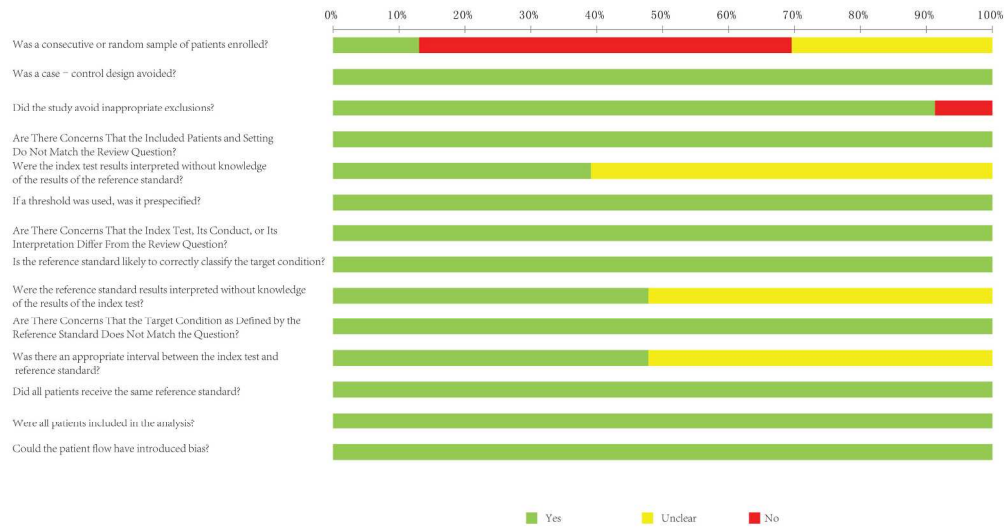

Supplemental Figure 2. Summary of QUADAS-2 assessments of included studies.

216x112mm (300 x 300 DPI)

review only

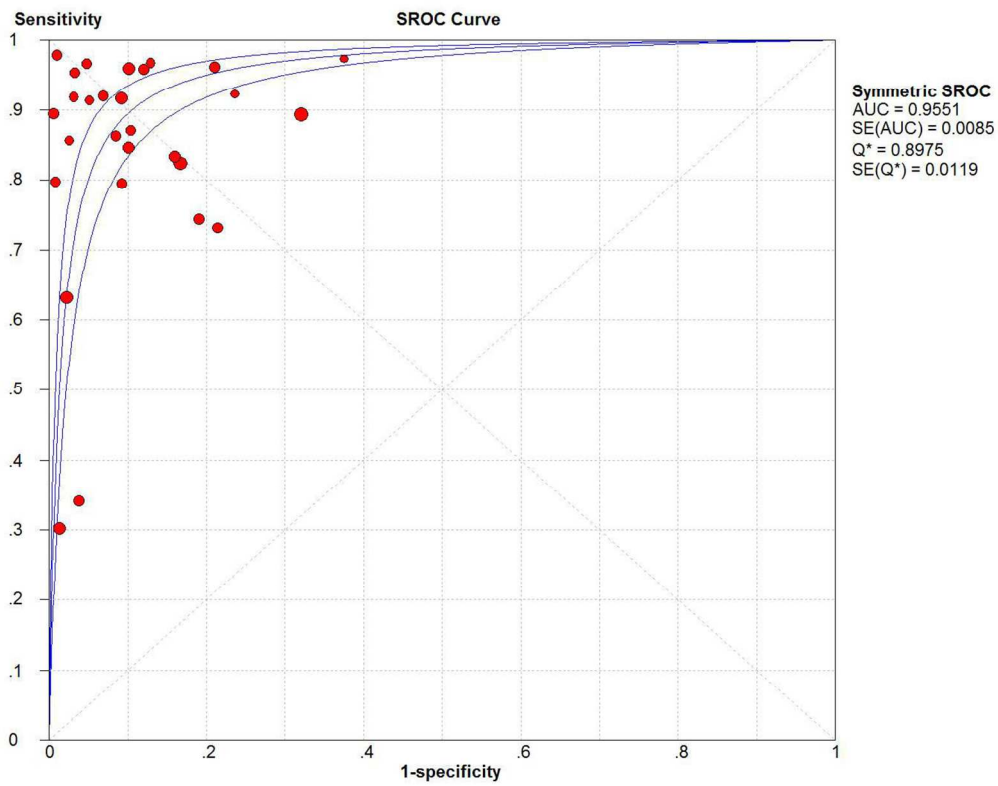

33  
34 Supplemental Figure 3. Summary receiver operating characteristic (SROC) curves and confidence interval  
35 for the diagnosis of H.pylori infection using IgG antibody in urine.

36 113x90mm (300 x 300 DPI)

1  
2  
3  
4  
5  
6  
7  
8  
9  
10  
11  
12  
13  
14  
15  
16  
17  
18  
19  
20  
21  
22  
23  
24  
25  
26  
27  
28  
29  
30  
31  
32  
33  
34  
35  
36  
37  
38  
39  
40  
41  
42  
43  
44  
45  
46  
47  
48  
49  
50  
51  
52  
53  
54  
55  
56  
57  
58  
59  
60

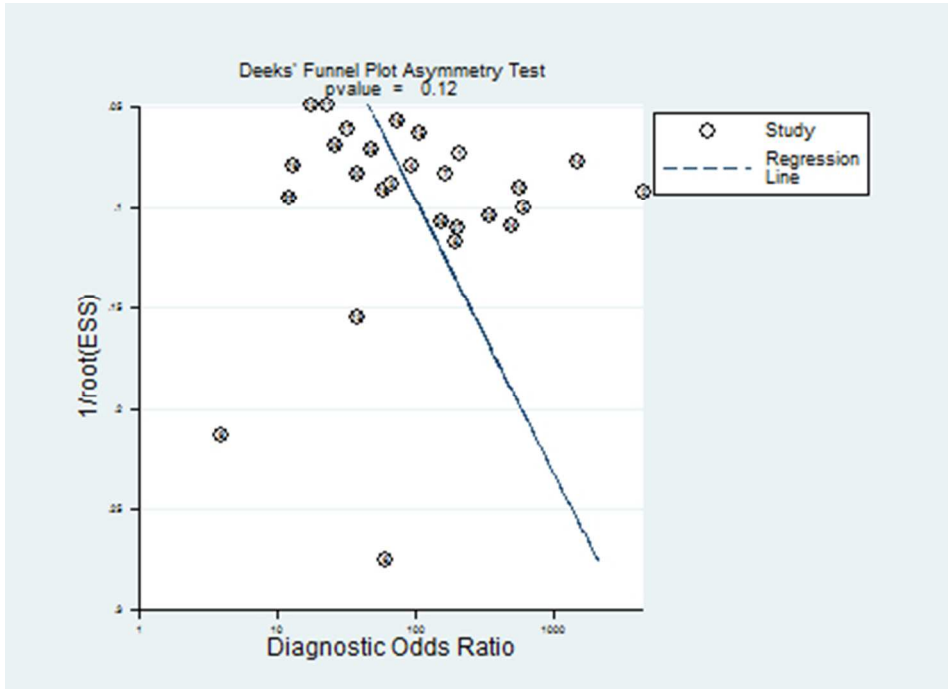

Supplemental Figure 4. Deek's funnel plot to assess the likelihood of publication bias. The statistically non-significant P-value of 0.124 for the slope coefficient suggests symmetry in the data and a low likelihood of publication bias

39x29mm (300 x 300 DPI)

Review only

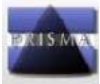

# PRISMA 2009 Checklist

| Section/topic                      | #  | Checklist item                                                                                                                                                                                                                                                                                              | Reported on page # |
|------------------------------------|----|-------------------------------------------------------------------------------------------------------------------------------------------------------------------------------------------------------------------------------------------------------------------------------------------------------------|--------------------|
| <b>TITLE</b>                       |    |                                                                                                                                                                                                                                                                                                             |                    |
| Title                              | 1  | Identify the report as a systematic review, meta-analysis, or both.                                                                                                                                                                                                                                         | 1                  |
| <b>ABSTRACT</b>                    |    |                                                                                                                                                                                                                                                                                                             |                    |
| Structured summary                 | 2  | Provide a structured summary including, as applicable: background; objectives; data sources; study eligibility criteria, participants, and interventions; study appraisal and synthesis methods; results; limitations; conclusions and implications of key findings; systematic review registration number. | 1                  |
| <b>INTRODUCTION</b>                |    |                                                                                                                                                                                                                                                                                                             |                    |
| Rationale                          | 3  | Describe the rationale for the review in the context of what is already known.                                                                                                                                                                                                                              | 3                  |
| Objectives                         | 4  | Provide an explicit statement of questions being addressed with reference to participants, interventions, comparisons, outcomes, and study design (PICOS).                                                                                                                                                  | 3,4                |
| <b>METHODS</b>                     |    |                                                                                                                                                                                                                                                                                                             |                    |
| Protocol and registration          | 5  | Indicate if a review protocol exists, if and where it can be accessed (e.g., Web address), and, if available, provide registration information including registration number.                                                                                                                               |                    |
| Eligibility criteria               | 6  | Specify study characteristics (e.g., PICOS, length of follow-up) and report characteristics (e.g., years considered, language, publication status) used as criteria for eligibility, giving rationale.                                                                                                      | 4                  |
| Information sources                | 7  | Describe all information sources (e.g., databases with dates of coverage, contact with study authors to identify additional studies) in the search and date last searched.                                                                                                                                  | 4,5                |
| Search                             | 8  | Present full electronic search strategy for at least one database, including any limits used, such that it could be repeated.                                                                                                                                                                               | 4                  |
| Study selection                    | 9  | State the process for selecting studies (i.e., screening, eligibility, included in systematic review, and, if applicable, included in the meta-analysis).                                                                                                                                                   | 4                  |
| Data collection process            | 10 | Describe method of data extraction from reports (e.g., piloted forms, independently, in duplicate) and any processes for obtaining and confirming data from investigators.                                                                                                                                  | 4,5                |
| Data items                         | 11 | List and define all variables for which data were sought (e.g., PICOS, funding sources) and any assumptions and simplifications made.                                                                                                                                                                       | 4,5                |
| Risk of bias in individual studies | 12 | Describe methods used for assessing risk of bias of individual studies (including specification of whether this was done at the study or outcome level), and how this information is to be used in any data synthesis.                                                                                      | 5                  |
| Summary measures                   | 13 | State the principal summary measures (e.g., risk ratio, difference in means).                                                                                                                                                                                                                               | 5                  |
| Synthesis of results               | 14 | Describe the methods of handling data and combining results of studies, if done, including measures of consistency (e.g., $I^2$ ) for each meta-analysis.                                                                                                                                                   | 5                  |

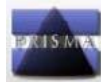

# PRISMA 2009 Checklist

| Section/topic                 | #  | Checklist item                                                                                                                                                                                           | Reported on page # |
|-------------------------------|----|----------------------------------------------------------------------------------------------------------------------------------------------------------------------------------------------------------|--------------------|
| Risk of bias across studies   | 15 | Specify any assessment of risk of bias that may affect the cumulative evidence (e.g., publication bias, selective reporting within studies).                                                             | 5                  |
| Additional analyses           | 16 | Describe methods of additional analyses (e.g., sensitivity or subgroup analyses, meta-regression), if done, indicating which were pre-specified.                                                         | 5                  |
| <b>RESULTS</b>                |    |                                                                                                                                                                                                          |                    |
| Study selection               | 17 | Give numbers of studies screened, assessed for eligibility, and included in the review, with reasons for exclusions at each stage, ideally with a flow diagram.                                          | 6                  |
| Study characteristics         | 18 | For each study, present characteristics for which data were extracted (e.g., study size, PICOS, follow-up period) and provide the citations.                                                             | 6                  |
| Risk of bias within studies   | 19 | Present data on risk of bias of each study and, if available, any outcome level assessment (see item 12).                                                                                                |                    |
| Results of individual studies | 20 | For all outcomes considered (benefits or harms), present, for each study: (a) simple summary data for each intervention group (b) effect estimates and confidence intervals, ideally with a forest plot. | 6-8                |
| Synthesis of results          | 21 | Present results of each meta-analysis done, including confidence intervals and measures of consistency.                                                                                                  | 6-8                |
| Risk of bias across studies   | 22 | Present results of any assessment of risk of bias across studies (see Item 15).                                                                                                                          | 9                  |
| Additional analysis           | 23 | Give results of additional analyses, if done (e.g., sensitivity or subgroup analyses, meta-regression [see Item 16]).                                                                                    | 7-8                |
| <b>DISCUSSION</b>             |    |                                                                                                                                                                                                          |                    |
| Summary of evidence           | 24 | Summarize the main findings including the strength of evidence for each main outcome; consider their relevance to key groups (e.g., healthcare providers, users, and policy makers).                     | 9-10               |
| Limitations                   | 25 | Discuss limitations at study and outcome level (e.g., risk of bias), and at review-level (e.g., incomplete retrieval of identified research, reporting bias).                                            | 11                 |
| Conclusions                   | 26 | Provide a general interpretation of the results in the context of other evidence, and implications for future research.                                                                                  | 11                 |
| <b>FUNDING</b>                |    |                                                                                                                                                                                                          |                    |
| Funding                       | 27 | Describe sources of funding for the systematic review and other support (e.g., supply of data); role of funders for the systematic review.                                                               | 11                 |

From: Moher D, Liberati A, Tetzlaff J, Altman DG, The PRISMA Group (2009). Preferred Reporting Items for Systematic Reviews and Meta-Analyses: The PRISMA Statement. PLoS Med 6(6): e1000097. doi:10.1371/journal.pmed1000097

For more information, visit: [www.prisma-statement.org](http://www.prisma-statement.org).
